# Supplementary material for: Platyzoan Paraphyly Based on Phylogenomic Data Supports a Noncoelomate Ancestry of Spiralia
Source: Oxford University Press journal article supplement (doi:10.1093/molbev/msu143), 2014-04-18
Supplement: msu143_Supplementary_Data.zip [file msu143_Supplementary_Data.zip]

**Table S1.** Collection information for species for which transcriptomic libraries were generated in this study.

| Species                                                  | Locality                                                                                        | Latitude/<br>Longitude     | Tissue                        |
|----------------------------------------------------------|-------------------------------------------------------------------------------------------------|----------------------------|-------------------------------|
| <i>Macracanthorhynchus<br/>hirudinaceus</i> <sup>1</sup> | South-Bakony Mountain, Game Park King Mathias,<br>South of Herend and Szentgal, Hungary         | 47.07866 N/<br>017.74976 E | ~50mg middle<br>piece, female |
| <i>Rotaria<br/>rotatoria</i>                             | Harasov lake (littoral benthos), Středočeský kraj,<br>Kokorinsko Protected Area, Czech Republic | 50.24441 N/<br>014.34150 E | ~600 specimen                 |
| <i>Lecane<br/>inermis</i>                                | Culture, Institute of Environmental Sciences,<br>Jagiellonian University, Poland                | n.a.                       | ~1000 specimen                |
| <i>Gnathostomula<br/>paradoxa</i>                        | List, North Sea island Sylt, Germany                                                            | 55.02480 N/<br>008.43520 E | ~10 specimen                  |
| <i>Macrodasyus sp.</i>                                   | List, North Sea island Sylt, Germany                                                            | 55.01534 N/<br>008.43618 E | ~20 specimen                  |
| <i>Dactylopodola<br/>baltica</i>                         | List, North Sea island Sylt, Germany                                                            | 55.01542 N/<br>008.43776 E | ~20 specimen                  |
| <i>Megadasyus sp.</i>                                    | List, North Sea island Sylt, Germany                                                            | 55.01534 N/<br>008.43618 E | ~100 specimen                 |
| <i>Lepidodermella<br/>squamata</i>                       | Culture, Carolina Biological Supply Company<br>(Burlington, NC)                                 | n.a.                       | ~500 specimen                 |
| <i>Nematoplana<br/>coelogygnoporoides</i>                | List, North Sea island Sylt, Germany                                                            | 55.02469 N/<br>008.43723 E | ~50 specimen                  |
| <i>Stylochoplana<br/>maculata</i>                        | North Sea island Helgoland, Germany                                                             | 54.18902 N/<br>007.86986 E | ~10 specimen                  |
| <i>Cephalothrix<br/>linearis</i>                         | Roscoff, Bretany, France                                                                        | 48.72947 N/<br>003.98924 W | 1 specimen                    |
| <i>Tubulanus<br/>polymorphus</i>                         | Ile Callot, Bretany, France                                                                     | 48.68664 N/<br>003.91958 W | small middle piece            |

<sup>1</sup> Host: wild boar (*Sus Scrofa*), ~16months of age, shot on 13 July 2010

**Table S2.** Information regarding the ESTs libraries used in this study and the taxonomic affiliation of the species. If not generated for this study sources of libraries were NCBI dbEST, trace archive, non-redundant database (nr) or short read archive (SRA) as well as genomes and Wey et al. (2013). Sequencing was done using either Sanger sequencing, 454 pyrosequencing or a Illumina Genome Analyzer IIx (GAIIx) HiSeq 2000 or MiSeq. Assembly was conducted with the pipeline described in Hausdorf et al. (2007) (MGIBlast/CAP3) or the CLC Genomics Workbench (CLC). #reads = number of quality processed reads for assembly.

| Group           | Subgroup                        | Species                                 | Source                       | sequencing      | #reads      | assembly      | #Contigs |
|-----------------|---------------------------------|-----------------------------------------|------------------------------|-----------------|-------------|---------------|----------|
| <b>Platyzoa</b> |                                 |                                         |                              |                 |             |               |          |
| Syndermata      | Acanthocephala                  | <i>Echinorhynchus truttae</i>           | NCBI dbEST                   | Sanger          | 1,238       | MGIBlast/CAP3 | 799      |
|                 |                                 | <i>Pomphorhynchus laevis</i>            | Wey et al. 2013              | Sanger          | 9,268       | MGIBlast/CAP3 | 4,126    |
|                 |                                 | <i>Macracanthorhynchus hirudinaceus</i> | this study                   | HiSeq/<br>MiSeq | 110,740,353 | CLC           | 22,822   |
|                 |                                 | <i>Paratenuisentis ambiguus</i>         | Wey et al. 2013              | 454             | 68,720      | MGIBlast/CAP3 | 9,825    |
|                 | Seisonidea                      | <i>Seison sp.</i>                       | Wey et al. 2013              | 454             | 58,239      | MGIBlast/CAP3 | 10,824   |
|                 | Bdelloidea                      | <i>Philodina roseola</i>                | NCBI dbEST/<br>trace archive | Sanger          | 3,171       | MGIBlast/CAP3 | 2,227    |
|                 |                                 | <i>Rotaria rotatoria</i>                | this study                   | HiSeq           | 72,636,191  | CLC           | 32,179   |
|                 |                                 | <i>Adineta vaga</i>                     | Wey et al. 2013              | 454             | 170,104     | MGIBlast/CAP3 | 18,966   |
|                 | Monogononta                     | <i>Brachionus plicatilis</i>            | dbEST/trace<br>archive       | Sanger          | 56,040      | MGIBlast/CAP3 | 18,828   |
|                 |                                 | <i>Brachionus manjavacas</i>            | Wey et al. 2013              | Sanger/454      | 85,393      | MGIBlast/CAP3 | 11,629   |
|                 |                                 | <i>Lecane inermis</i>                   | this study                   | 454             | 41,040      | MGIBlast/CAP3 | 6,637    |
| Gnathostomulida | /                               | <i>Gnathostomula peregrina</i>          | NCBI trace<br>archive        | Sanger          | 3,075       | MGIBlast/CAP3 | 2,108    |
|                 |                                 | <i>Gnathostomula paradoxa</i>           | this study                   | GAIIx           | 50,624,897  | CLC           | 53,430   |
| Gastrotricha    | Macrodasyida                    | <i>Turbanella ambronensis</i>           | NCBI trace<br>archive        | Sanger          | 3,129       | MGIBlast/CAP3 | 814      |
|                 |                                 | <i>Macrodasydys sp.</i>                 | this study                   | GAIIx           | 21,024,813  | CLC           | 28,219   |
|                 |                                 | <i>Dactylopodola baltica</i>            | this study                   | GAIIx           | 10,521,419  | CLC           | 25,346   |
|                 |                                 | <i>Megadasydys sp.</i>                  | this study                   | GAIIx           | 22,843,936  | CLC           | 52,730   |
|                 | Chaetonotida                    | <i>Lepidodermella squamata</i>          | this study                   | GAIIx           | 22,511,133  | CLC           | 65,056   |
| Platyhelminthes | Cestoda                         | <i>Echinococcus multilocularis</i>      | NCBI dbEST                   | Sanger          | 1,168       | MGIBlast/CAP3 | 775      |
|                 |                                 | <i>Echinococcus granulosus</i>          | NCBI dbEST                   | Sanger          | 9,701       | MGIBlast/CAP3 | 2,723    |
|                 |                                 | <i>Moniezia expansa</i>                 | NCBI nr                      |                 |             |               | 49,605   |
|                 |                                 | <i>Spirometra erinacei</i>              | NCBI dbEST                   | Sanger          | 6,836       | CLC           | 1,012    |
|                 |                                 | <i>Taenia solium</i>                    | NCBI dbEST                   | Sanger          | 23,245      | MGIBlast/CAP3 | 6,623    |
|                 |                                 | <i>Schistosoma mansoni</i>              | Genome                       |                 |             |               | 33,704   |
|                 | "Trematoda"<br>(Digenea)        | <i>Schistosoma japonicum</i>            | NCBI dbEST                   | Sanger          | 96,831      | MGIBlast/CAP3 | 32,405   |
|                 |                                 | <i>Clonorchis sinensis</i>              | NCBI dbEST                   | Sanger          | 2,908       | MGIBlast/CAP3 | 1,725    |
|                 |                                 | <i>Fasciola gigantica</i>               | NCBI dbEST                   | Sanger          | 8,395       | CLC           | 797      |
|                 |                                 | <i>Opisthorchis viverrini</i>           | NCBI dbEST                   | Sanger          | 4,194       | MGIBlast/CAP3 | 1,979    |
|                 | "Turbellaria"<br>(Tricladida)   | <i>Dugesia japonica</i>                 | NCBI dbEST                   | Sanger          | 7,252       | MGIBlast/CAP3 | 3,929    |
|                 |                                 | <i>Dugesia ryukyuensis</i>              | NCBI dbEST                   | Sanger          | 8,986       | MGIBlast/CAP3 | 3,319    |
|                 |                                 | <i>Schmidtea mediterranea</i>           | NCBI dbEST                   | Sanger          | 73,760      | MGIBlast/CAP3 | 16,323   |
|                 | "Turbellaria"<br>(Macrostomida) | <i>Macrostomum lignano</i>              | NCBI dbEST                   | Sanger          | 7,607       | MGIBlast/CAP3 | 5,534    |
|                 | "Turbellaria"<br>(Proseriata)   | <i>Nematoplanea coelogyneporoides</i>   | this study                   | 454             | 380,401     | CLC           | 3,718    |
|                 | "Turbellaria"<br>(Polycladida)  | <i>Paraplanocera sp.</i>                | trace archive                | Sanger          | 3,224       | MGIBlast/CAP3 | 1,485    |
|                 |                                 | <i>Stylochoplana maculata</i>           | this study                   | 454             | 632,726     | CLC           | 23,097   |

| Lophotrochozoa       |                 |                                |                      |        |            |               |        |
|----------------------|-----------------|--------------------------------|----------------------|--------|------------|---------------|--------|
| Cycliophora          | /               | <i>Symbion pandora</i>         | NCBI trace archive   | Sanger | 3,763      | MGIBlast/CAP3 | 949    |
| Entoprocta           | /               | <i>Pedicellina cernua</i>      | NCBI trace archive   | Sanger | 7,777      | MGIBlast/CAP3 | 2,348  |
|                      |                 | <i>Pedicellina sp.</i>         | NCBI trace archive   | Sanger | 1,907      | MGIBlast/CAP3 | 648    |
| Ectoprocta (Bryozoa) | Phylactolaemata | <i>Criststella mucedo</i>      | NCBI trace archive   | Sanger | 2,981      | MGIBlast/CAP3 | 668    |
|                      | Gymnolaemata    | <i>Bugula neritina</i>         | NCBI SRA             | 454    | 139,131    | CLC           | 5,142  |
|                      |                 | <i>Tubulipora sp.</i>          | NCBI dbEST           | Sanger | 2,039      | CLC           | 1,237  |
|                      |                 | <i>Flustra foliacea</i>        | Hausdorf et al. 2007 | Sanger | 4,074      | MGIBlast/CAP3 | 1,755  |
|                      |                 | <i>Alcyonidium diaphanum</i>   | NCBI dbEST           | Sanger | 2,331      | CLC           | 1,424  |
| Brachiopoda          | Brachiopoda     | <i>Terebratalia transversa</i> | NCBI trace archive   | Sanger | 3,154      | MGIBlast/CAP3 | 1,902  |
|                      |                 | <i>Lingula anatina</i>         | NCBI SRA             | 454    | 70,309     | CLC           | 5,748  |
| Nemertea             | /               | <i>Cephalothrix linearis</i>   | this study           | GAIIx  | 23,104,655 | CLC           | 44,041 |
|                      |                 | <i>Tubulanus polymorphus</i>   | this study           | GAIIx  | 13,645     | CLC           | 37,851 |
| Mollusca             | Cephalopoda     | <i>Euprymna scolopes</i>       | NCBI dbEST           | Sanger | 77,159     | MGIBlast/CAP3 | 27,036 |
|                      |                 | <i>Idiosepius paradoxus</i>    | NCBI dbEST           | Sanger | 8,811      | MGIBlast/CAP3 | 5,058  |
|                      | Polyplacophora  | <i>Chaetopleura apiculata</i>  | NCBI SRA             | 454    | 148,345    | CLC           | 7,762  |
|                      | Neomeniomorpha  | <i>Neomenia megaltrapezata</i> | NCBI SRA             | GAIIx  | 54,583,176 | CLC           | 31,371 |
|                      | Gastropoda      | <i>Biomphalaria glabrata</i>   | NCBI dbEST           | Sanger | 52,852     | MGIBlast/CAP3 | 20,079 |
|                      |                 | <i>Lottia gigantea</i>         | Genome               |        |            |               | 23,851 |
|                      |                 | <i>Aplysia californica</i>     | NCBI dbEST           | Sanger | 178,146    | MGIBlast/CAP3 | 61,194 |
|                      | Bivalvia        | <i>Crassostrea gigas</i>       | NCBI dbEST           | Sanger | 28,767     | MGIBlast/CAP3 | 17,941 |
|                      |                 | <i>Mytilus californianus</i>   | NCBI dbEST           | Sanger | 23,688     | MGIBlast/CAP3 | 15,429 |
| Annelida             | Clitellata      | <i>Helobdella robusta</i>      | Genome               |        |            |               | 23,432 |
|                      |                 | <i>Lumbricus rubellus</i>      | NCBI dbEST           | Sanger | 19,888     | MGIBlast/CAP3 | 10,422 |
|                      |                 | <i>Tubifex tubifex</i>         | NCBI dbEST           | Sanger | 17,009     | MGIBlast/CAP3 | 8,008  |
|                      | "Polychaeta"    | <i>Capitella telata</i>        | Genome               |        |            |               | 32,415 |
|                      |                 | <i>Alvinella pompejana</i>     | NCBI dbEST           | Sanger | 142,322    | MGIBlast/CAP3 | 25,723 |
| Ecdysozoa            |                 |                                |                      |        |            |               |        |
| Ecdysozoa            | Priapulida      | <i>Priapulus caudatus</i>      | NCBI dbEST           | Sanger | 2,281      | MGIBlast/CAP3 | 1,424  |
|                      | Kinorhyncha     | <i>Echinoderes horni</i>       | NCBI trace archive   | Sanger | 3,050      | MGIBlast/CAP3 | 2,277  |
|                      | Arthropoda      | <i>Daphnia pulex</i>           | NCBI dbEST           | Sanger | 152,067    | MGIBlast/CAP3 | 32,206 |
|                      |                 | <i>Apis mellifera</i>          | Genome               |        |            |               | 25,009 |

**Table S3.** Information regarding the orthology prediction (Orth.), the exclusion of redundantly assigned sequences (Red.) and the alignment (Align.) and masking (Mask.) procedure. Mean values are also provided. Absolute numbers (#) as well as percentages (%) are given. Pos = positions, Diff = difference.

| Gene-ID | Orth.<br>#taxa | Red.<br>#taxa | Diff.<br># % | Align.<br>#Pos. | Mask.<br>#Pos. | Diff.<br>% |
|---------|----------------|---------------|--------------|-----------------|----------------|------------|
| 111202  | 33             | 32            | 1 3.0        | 574             | 1              | 99.8       |
| 111203  | 32             | 31            | 1 3.1        | 247             | 108            | 56.3       |
| 111204  | 39             | 39            | 0 0.0        | 164             | 132            | 19.5       |
| 111205  | 23             | 23            | 0 0.0        | 1253            | 34             | 97.3       |
| 111206  | 19             | 19            | 0 0.0        | 607             | 103            | 83.0       |
| 111207  | 26             | 26            | 0 0.0        | 504             | 71             | 85.9       |
| 111208  | 17             | 17            | 0 0.0        | 1674            | 1              | 99.9       |
| 111209  | 23             | 23            | 0 0.0        | 1749            | 51             | 97.1       |
| 111210  | 22             | 22            | 0 0.0        | 577             | 37             | 93.6       |
| 111211  | 29             | 29            | 0 0.0        | 790             | 1              | 99.9       |
| 111212  | 20             | 20            | 0 0.0        | 500             | 61             | 87.8       |
| 111213  | 20             | 20            | 0 0.0        | 255             | 153            | 40.0       |
| 111214  | 47             | 41            | 6 12.8       | 240             | 185            | 22.9       |
| 111215  | 39             | 38            | 1 2.6        | 164             | 123            | 25.0       |
| 111216  | 46             | 46            | 0 0.0        | 146             | 146            | 0.0        |
| 111217  | 46             | 46            | 0 0.0        | 154             | 154            | 0.0        |
| 111218  | 16             | 16            | 0 0.0        | 653             | 78             | 88.1       |
| 111219  | 28             | 28            | 0 0.0        | 747             | 66             | 91.2       |
| 111220  | 25             | 25            | 0 0.0        | 389             | 116            | 70.2       |
| 111221  | 21             | 21            | 0 0.0        | 783             | 1              | 99.9       |
| 111222  | 33             | 33            | 0 0.0        | 222             | 152            | 31.5       |
| 111223  | 26             | 26            | 0 0.0        | 1019            | 7              | 99.3       |
| 111224  | 19             | 19            | 0 0.0        | 1290            | 1              | 99.9       |
| 111225  | 18             | 18            | 0 0.0        | 827             | 104            | 87.4       |
| 111226  | 16             | 16            | 0 0.0        | 896             | 1              | 99.9       |
| 111227  | 21             | 21            | 0 0.0        | 1364            | 1              | 99.9       |
| 111228  | 14             | 14            | 0 0.0        | 665             | 56             | 91.6       |
| 111229  | 43             | 43            | 0 0.0        | 274             | 191            | 30.3       |
| 111230  | 24             | 24            | 0 0.0        | 269             | 70             | 74.0       |
| 111231  | 24             | 24            | 0 0.0        | 1429            | 1              | 99.9       |
| 111232  | 30             | 30            | 0 0.0        | 307             | 162            | 47.2       |
| 111233  | 24             | 24            | 0 0.0        | 497             | 1              | 99.8       |
| 111234  | 25             | 25            | 0 0.0        | 336             | 211            | 37.2       |
| 111235  | 22             | 22            | 0 0.0        | 511             | 55             | 89.2       |
| 111236  | 17             | 17            | 0 0.0        | 1110            | 1              | 99.9       |
| 111237  | 27             | 27            | 0 0.0        | 359             | 195            | 45.7       |
| 111238  | 28             | 28            | 0 0.0        | 148             | 91             | 38.5       |
| 111239  | 23             | 23            | 0 0.0        | 224             | 135            | 39.7       |
| 111240  | 20             | 20            | 0 0.0        | 1612            | 35             | 97.8       |
| 111241  | 27             | 27            | 0 0.0        | 405             | 12             | 97.0       |
| 111242  | 21             | 21            | 0 0.0        | 275             | 102            | 62.9       |
| 111243  | 34             | 34            | 0 0.0        | 253             | 218            | 13.8       |
| 111244  | 18             | 18            | 0 0.0        | 337             | 1              | 99.7       |
| 111245  | 15             | 15            | 0 0.0        | 345             | 168            | 51.3       |
| 111246  | 25             | 25            | 0 0.0        | 732             | 1              | 99.9       |
| 111247  | 29             | 29            | 0 0.0        | 336             | 71             | 78.9       |
| 111248  | 23             | 23            | 0 0.0        | 632             | 107            | 83.1       |
| 111249  | 37             | 36            | 1 2.7        | 461             | 268            | 41.9       |
| 111250  | 22             | 22            | 0 0.0        | 1091            | 109            | 90.0       |
| 111251  | 27             | 27            | 0 0.0        | 282             | 109            | 61.3       |
| 111252  | 29             | 29            | 0 0.0        | 940             | 1              | 99.9       |
| 111253  | 20             | 20            | 0 0.0        | 517             | 88             | 83.0       |
| 111254  | 28             | 26            | 2 7.1        | 447             | 27             | 94.0       |
| 111255  | 20             | 20            | 0 0.0        | 825             | 1              | 99.9       |
| 111256  | 23             | 23            | 0 0.0        | 810             | 17             | 97.9       |
| 111257  | 19             | 19            | 0 0.0        | 969             | 65             | 93.3       |
| 111258  | 21             | 21            | 0 0.0        | 670             | 23             | 96.6       |
| 111259  | 40             | 40            | 0 0.0        | 210             | 122            | 41.9       |
| 111260  | 20             | 20            | 0 0.0        | 489             | 88             | 82.0       |
| 111261  | 20             | 20            | 0 0.0        | 430             | 62             | 85.6       |
| 111262  | 26             | 26            | 0 0.0        | 458             | 2              | 99.6       |
| 111263  | 23             | 23            | 0 0.0        | 183             | 102            | 44.3       |
| 111264  | 35             | 34            | 1 2.9        | 4972            | 1              | 100.0      |
| 111265  | 29             | 29            | 0 0.0        | 239             | 72             | 69.9       |
| 111266  | 40             | 40            | 0 0.0        | 150             | 85             | 43.3       |
| 111267  | 19             | 19            | 0 0.0        | 351             | 187            | 46.7       |
| 111268  | 22             | 22            | 0 0.0        | 596             | 99             | 83.4       |
| 111269  | 27             | 27            | 0 0.0        | 576             | 157            | 72.7       |

| Gene-ID | Orth.<br>#taxa | Red.<br>#taxa | Diff.<br># % | Align.<br>#Pos. | Mask.<br>#Pos. | Diff.<br>% |
|---------|----------------|---------------|--------------|-----------------|----------------|------------|
| 111270  | 27             | 27            | 0 0.0        | 443             | 8              | 98.2       |
| 111271  | 29             | 29            | 0 0.0        | 288             | 198            | 31.3       |
| 111272  | 27             | 26            | 1 3.7        | 472             | 95             | 79.9       |
| 111273  | 28             | 28            | 0 0.0        | 474             | 130            | 72.6       |
| 111274  | 46             | 46            | 0 0.0        | 162             | 110            | 32.1       |
| 111275  | 37             | 36            | 1 2.7        | 239             | 188            | 21.3       |
| 111276  | 28             | 28            | 0 0.0        | 183             | 149            | 18.6       |
| 111277  | 45             | 45            | 0 0.0        | 163             | 142            | 12.9       |
| 111278  | 32             | 31            | 1 3.1        | 443             | 146            | 67.0       |
| 111279  | 25             | 25            | 0 0.0        | 781             | 55             | 93.0       |
| 111280  | 38             | 38            | 0 0.0        | 554             | 1              | 99.8       |
| 111281  | 47             | 46            | 1 2.1        | 181             | 170            | 6.1        |
| 111282  | 26             | 26            | 0 0.0        | 557             | 183            | 67.1       |
| 111283  | 21             | 21            | 0 0.0        | 226             | 184            | 18.6       |
| 111284  | 22             | 22            | 0 0.0        | 1348            | 99             | 92.7       |
| 111285  | 24             | 24            | 0 0.0        | 439             | 39             | 91.1       |
| 111286  | 49             | 49            | 0 0.0        | 92              | 92             | 0.0        |
| 111287  | 36             | 36            | 0 0.0        | 178             | 126            | 29.2       |
| 111288  | 18             | 18            | 0 0.0        | 388             | 114            | 70.6       |
| 111289  | 12             | 12            | 0 0.0        | 215             | 177            | 17.7       |
| 111290  | 27             | 27            | 0 0.0        | 228             | 204            | 10.5       |
| 111291  | 26             | 26            | 0 0.0        | 138             | 101            | 26.8       |
| 111292  | 27             | 22            | 5 18.5       | 1014            | 12             | 98.8       |
| 111293  | 22             | 22            | 0 0.0        | 494             | 9              | 98.2       |
| 111294  | 21             | 21            | 0 0.0        | 615             | 3              | 99.5       |
| 111295  | 26             | 26            | 0 0.0        | 198             | 181            | 8.6        |
| 111296  | 24             | 24            | 0 0.0        | 380             | 216            | 43.2       |
| 111297  | 26             | 26            | 0 0.0        | 751             | 98             | 87.0       |
| 111298  | 18             | 18            | 0 0.0        | 251             | 147            | 41.4       |
| 111299  | 33             | 33            | 0 0.0        | 227             | 105            | 53.7       |
| 111300  | 31             | 31            | 0 0.0        | 302             | 158            | 47.7       |
| 111301  | 26             | 26            | 0 0.0        | 561             | 1              | 99.8       |
| 111302  | 24             | 24            | 0 0.0        | 716             | 48             | 93.3       |
| 111303  | 17             | 17            | 0 0.0        | 301             | 104            | 65.4       |
| 111304  | 18             | 17            | 1 5.6        | 766             | 34             | 95.6       |
| 111305  | 26             | 26            | 0 0.0        | 549             | 1              | 99.8       |
| 111306  | 24             | 24            | 0 0.0        | 421             | 103            | 75.5       |
| 111307  | 26             | 26            | 0 0.0        | 209             | 140            | 33.0       |
| 111308  | 16             | 16            | 0 0.0        | 516             | 38             | 92.6       |
| 111309  | 26             | 26            | 0 0.0        | 594             | 180            | 69.7       |
| 111310  | 22             | 22            | 0 0.0        | 195             | 136            | 30.3       |
| 111311  | 25             | 25            | 0 0.0        | 446             | 252            | 43.5       |
| 111312  | 30             | 30            | 0 0.0        | 943             | 1              | 99.9       |
| 111313  | 29             | 29            | 0 0.0        | 199             | 105            | 47.2       |
| 111314  | 19             | 19            | 0 0.0        | 997             | 1              | 99.9       |
| 111315  | 20             | 20            | 0 0.0        | 501             | 1              | 99.8       |
| 111316  | 34             | 34            | 0 0.0        | 214             | 214            | 0.0        |
| 111317  | 35             | 35            | 0 0.0        | 645             | 1              | 99.8       |
| 111318  | 41             | 41            | 0 0.0        | 153             | 109            | 28.8       |
| 111319  | 24             | 24            | 0 0.0        | 492             | 93             | 81.1       |
| 111320  | 26             | 26            | 0 0.0        | 92              | 92             | 0.0        |
| 111321  | 26             | 26            | 0 0.0        | 271             | 117            | 56.8       |
| 111322  | 20             | 20            | 0 0.0        | 1088            | 1              | 99.9       |
| 111323  | 32             | 32            | 0 0.0        | 654             | 1              | 99.8       |
| 111324  | 41             | 41            | 0 0.0        | 347             | 335            | 3.5        |
| 111325  | 34             | 34            | 0 0.0        | 748             | 11             | 98.5       |
| 111326  | 24             | 24            | 0 0.0        | 489             | 1              | 99.8       |
| 111327  | 18             | 18            | 0 0.0        | 912             | 1              | 99.9       |
| 111328  | 31             | 31            | 0 0.0        | 160             | 79             | 50.6       |
| 111329  | 32             | 32            | 0 0.0        | 405             | 54             | 86.7       |
| 111330  | 22             | 22            | 0 0.0        | 224             | 136            | 39.3       |
| 111331  | 20             | 20            | 0 0.0        | 295             | 142            | 51.9       |
| 111332  | 25             | 18            | 7 28.0       | 584             | 152            | 74.0       |
| 111333  | 18             | 18            | 0 0.0        | 507             | 126            | 75.1       |
| 111334  | 19             | 19            | 0 0.0        | 523             | 108            | 79.3       |
| 111335  | 35             | 34            | 1 2.9        | 294             | 205            | 30.3       |
| 111336  | 16             | 16            | 0 0.0        | 497             | 1              | 99.8       |
| 111337  | 21             | 20            | 1 4.8        | 430             | 37             | 91.4       |

| Gene-ID | Orth.<br>#taxa | Red.<br>#taxa | Diff.<br># % | Align.<br>#Pos. | Mask.<br>#Pos. | Diff.<br>% |
|---------|----------------|---------------|--------------|-----------------|----------------|------------|
| 111338  | 21             | 21            | 0 0.0        | 1815            | 1              | 99.9       |
| 111339  | 22             | 22            | 0 0.0        | 398             | 123            | 69.1       |
| 111340  | 20             | 20            | 0 0.0        | 426             | 103            | 75.8       |
| 111341  | 17             | 17            | 0 0.0        | 532             | 60             | 88.7       |
| 111342  | 18             | 18            | 0 0.0        | 1076            | 9              | 99.2       |
| 111343  | 30             | 30            | 0 0.0        | 382             | 45             | 88.2       |
| 111344  | 21             | 21            | 0 0.0        | 378             | 51             | 86.5       |
| 111345  | 23             | 23            | 0 0.0        | 65              | 64             | 1.5        |
| 111346  | 26             | 26            | 0 0.0        | 1594            | 1              | 99.9       |
| 111347  | 36             | 36            | 0 0.0        | 291             | 234            | 19.6       |
| 111348  | 31             | 31            | 0 0.0        | 317             | 93             | 70.7       |
| 111349  | 28             | 28            | 0 0.0        | 216             | 148            | 31.5       |
| 111350  | 29             | 29            | 0 0.0        | 1096            | 1              | 99.9       |
| 111351  | 17             | 17            | 0 0.0        | 651             | 95             | 85.4       |
| 111352  | 28             | 28            | 0 0.0        | 1004            | 77             | 92.3       |
| 111353  | 12             | 12            | 0 0.0        | 644             | 126            | 80.4       |
| 111354  | 14             | 14            | 0 0.0        | 957             | 1              | 99.9       |
| 111355  | 30             | 30            | 0 0.0        | 1051            | 1              | 99.9       |
| 111356  | 24             | 24            | 0 0.0        | 517             | 36             | 93.0       |
| 111357  | 27             | 27            | 0 0.0        | 367             | 78             | 78.7       |
| 111358  | 24             | 24            | 0 0.0        | 2460            | 1              | 100.0      |
| 111359  | 22             | 22            | 0 0.0        | 129             | 103            | 20.2       |
| 111360  | 20             | 20            | 0 0.0        | 603             | 18             | 97.0       |
| 111361  | 19             | 19            | 0 0.0        | 1333            | 61             | 95.4       |
| 111362  | 19             | 19            | 0 0.0        | 823             | 1              | 99.9       |
| 111363  | 22             | 22            | 0 0.0        | 435             | 105            | 75.9       |
| 111364  | 21             | 21            | 0 0.0        | 455             | 171            | 62.4       |
| 111365  | 35             | 35            | 0 0.0        | 376             | 289            | 23.1       |
| 111366  | 20             | 20            | 0 0.0        | 189             | 116            | 38.6       |
| 111367  | 31             | 30            | 1 3.2        | 992             | 28             | 97.2       |
| 111368  | 25             | 25            | 0 0.0        | 467             | 49             | 89.5       |
| 111369  | 28             | 28            | 0 0.0        | 1144            | 1              | 99.9       |
| 111370  | 23             | 23            | 0 0.0        | 432             | 54             | 87.5       |
| 111371  | 16             | 16            | 0 0.0        | 581             | 119            | 79.5       |
| 111372  | 26             | 26            | 0 0.0        | 584             | 57             | 90.2       |
| 111373  | 27             | 26            | 1 3.7        | 1169            | 5              | 99.6       |
| 111374  | 11             | 11            | 0 0.0        | 882             | 56             | 93.7       |
| 111375  | 25             | 25            | 0 0.0        | 229             | 148            | 35.4       |
| 111376  | 24             | 24            | 0 0.0        | 502             | 1              | 99.8       |
| 111377  | 26             | 26            | 0 0.0        | 562             | 52             | 90.7       |
| 111378  | 23             | 23            | 0 0.0        | 870             | 3              | 99.7       |
| 111379  | 32             | 32            | 0 0.0        | 148             | 134            | 9.5        |
| 111380  | 20             | 20            | 0 0.0        | 1243            | 1              | 99.9       |
| 111381  | 19             | 19            | 0 0.0        | 1163            | 1              | 99.9       |
| 111382  | 28             | 27            | 1 3.6        | 544             | 57             | 89.5       |
| 111383  | 24             | 24            | 0 0.0        | 541             | 12             | 97.8       |
| 111384  | 27             | 27            | 0 0.0        | 394             | 49             | 87.6       |
| 111385  | 19             | 19            | 0 0.0        | 1004            | 1              | 99.9       |
| 111386  | 22             | 22            | 0 0.0        | 606             | 61             | 89.9       |
| 111387  | 37             | 37            | 0 0.0        | 442             | 397            | 10.2       |
| 111388  | 23             | 23            | 0 0.0        | 267             | 87             | 67.4       |
| 111389  | 25             | 25            | 0 0.0        | 511             | 172            | 66.3       |
| 111390  | 22             | 22            | 0 0.0        | 264             | 119            | 54.9       |
| 111391  | 30             | 29            | 1 3.3        | 583             | 173            | 70.3       |
| 111392  | 24             | 24            | 0 0.0        | 775             | 57             | 92.6       |
| 111393  | 32             | 31            | 1 3.1        | 338             | 141            | 58.3       |
| 111394  | 45             | 45            | 0 0.0        | 195             | 168            | 13.8       |
| 111395  | 25             | 25            | 0 0.0        | 452             | 104            | 77.0       |
| 111396  | 22             | 22            | 0 0.0        | 695             | 1              | 99.9       |
| 111397  | 18             | 18            | 0 0.0        | 1447            | 1              | 99.9       |
| 111398  | 16             | 16            | 0 0.0        | 747             | 42             | 94.4       |
| 111399  | 25             | 25            | 0 0.0        | 568             | 56             | 90.1       |
| 111400  | 18             | 18            | 0 0.0        | 392             | 16             | 95.9       |
| 111401  | 31             | 31            | 0 0.0        | 602             | 119            | 80.2       |
| 111402  | 24             | 24            | 0 0.0        | 271             | 181            | 33.2       |
| 111403  | 24             | 24            | 0 0.0        | 961             | 55             | 94.3       |
| 111404  | 32             | 32            | 0 0.0        | 745             | 63             | 91.5       |
| 111405  | 32             | 32            | 0 0.0        | 387             | 232            | 40.1       |
| 111406  | 21             | 21            | 0 0.0        | 1884            | 1              | 99.9       |
| 111407  | 24             | 24            | 0 0.0        | 311             | 103            | 66.9       |
| 111408  | 23             | 23            | 0 0.0        | 267             | 133            | 50.2       |
| 111409  | 34             | 34            | 0 0.0        | 199             | 171            | 14.1       |
| 111410  | 29             | 29            | 0 0.0        | 263             | 66             | 74.9       |
| 111411  | 24             | 24            | 0 0.0        | 294             | 58             | 80.3       |
| 111412  | 26             | 26            | 0 0.0        | 311             | 31             | 90.0       |

| Gene-ID | Orth.<br>#taxa | Red.<br>#taxa | Diff.<br># % | Align.<br>#Pos. | Mask.<br>#Pos. | Diff.<br>% |
|---------|----------------|---------------|--------------|-----------------|----------------|------------|
| 111413  | 33             | 33            | 0 0.0        | 380             | 251            | 33.9       |
| 111414  | 37             | 37            | 0 0.0        | 166             | 142            | 14.5       |
| 111415  | 26             | 26            | 0 0.0        | 162             | 104            | 35.8       |
| 111416  | 31             | 31            | 0 0.0        | 461             | 1              | 99.8       |
| 111417  | 19             | 19            | 0 0.0        | 218             | 158            | 27.5       |
| 111418  | 26             | 25            | 1 3.8        | 621             | 118            | 81.0       |
| 111419  | 34             | 33            | 1 2.9        | 413             | 150            | 63.7       |
| 111420  | 22             | 21            | 1 4.5        | 1159            | 31             | 97.3       |
| 111421  | 31             | 31            | 0 0.0        | 430             | 168            | 60.9       |
| 111422  | 24             | 24            | 0 0.0        | 564             | 1              | 99.8       |
| 111423  | 35             | 35            | 0 0.0        | 350             | 152            | 56.6       |
| 111424  | 9              | 9             | 0 0.0        | 2201            | 1              | 100.0      |
| 111425  | 31             | 31            | 0 0.0        | 335             | 128            | 61.8       |
| 111426  | 26             | 26            | 0 0.0        | 314             | 124            | 60.5       |
| 111427  | 33             | 33            | 0 0.0        | 511             | 59             | 88.5       |
| 111428  | 20             | 20            | 0 0.0        | 156             | 93             | 40.4       |
| 111429  | 36             | 36            | 0 0.0        | 194             | 110            | 43.3       |
| 111430  | 33             | 33            | 0 0.0        | 159             | 106            | 33.3       |
| 111431  | 24             | 24            | 0 0.0        | 1035            | 77             | 92.6       |
| 111432  | 38             | 38            | 0 0.0        | 243             | 183            | 24.7       |
| 111433  | 34             | 34            | 0 0.0        | 474             | 52             | 89.0       |
| 111434  | 27             | 26            | 1 3.7        | 447             | 129            | 71.1       |
| 111435  | 42             | 42            | 0 0.0        | 108             | 82             | 24.1       |
| 111436  | 25             | 25            | 0 0.0        | 297             | 105            | 64.6       |
| 111437  | 25             | 25            | 0 0.0        | 476             | 1              | 99.8       |
| 111438  | 18             | 18            | 0 0.0        | 399             | 54             | 86.5       |
| 111439  | 28             | 28            | 0 0.0        | 389             | 235            | 39.6       |
| 111440  | 33             | 33            | 0 0.0        | 142             | 111            | 21.8       |
| 111441  | 31             | 31            | 0 0.0        | 223             | 204            | 8.5        |
| 111442  | 24             | 24            | 0 0.0        | 716             | 1              | 99.9       |
| 111443  | 18             | 18            | 0 0.0        | 563             | 82             | 85.4       |
| 111444  | 31             | 29            | 2 6.5        | 582             | 34             | 94.2       |
| 111445  | 24             | 24            | 0 0.0        | 163             | 66             | 59.5       |
| 111446  | 18             | 12            | 6 33.3       | 457             | 28             | 93.9       |
| 111447  | 23             | 23            | 0 0.0        | 623             | 109            | 82.5       |
| 111448  | 31             | 31            | 0 0.0        | 367             | 79             | 78.5       |
| 111449  | 22             | 22            | 0 0.0        | 1240            | 1              | 99.9       |
| 111450  | 24             | 23            | 1 4.2        | 199             | 112            | 43.7       |
| 111451  | 35             | 25            | 10 28.6      | 273             | 244            | 10.6       |
| 111452  | 21             | 21            | 0 0.0        | 310             | 114            | 63.2       |
| 111453  | 40             | 40            | 0 0.0        | 262             | 67             | 74.4       |
| 111454  | 29             | 29            | 0 0.0        | 251             | 138            | 45.0       |
| 111455  | 20             | 20            | 0 0.0        | 380             | 119            | 68.7       |
| 111456  | 18             | 13            | 5 27.8       | 525             | 1              | 99.8       |
| 111457  | 32             | 32            | 0 0.0        | 486             | 105            | 78.4       |
| 111458  | 21             | 21            | 0 0.0        | 306             | 233            | 23.9       |
| 111459  | 31             | 30            | 1 3.2        | 1266            | 71             | 94.4       |
| 111460  | 18             | 17            | 1 5.6        | 1649            | 1              | 99.9       |
| 111461  | 23             | 23            | 0 0.0        | 527             | 102            | 80.6       |
| 111462  | 30             | 30            | 0 0.0        | 865             | 1              | 99.9       |
| 111463  | 29             | 29            | 0 0.0        | 462             | 88             | 81.0       |
| 111464  | 17             | 17            | 0 0.0        | 360             | 77             | 78.6       |
| 111465  | 19             | 19            | 0 0.0        | 724             | 1              | 99.9       |
| 111466  | 53             | 53            | 0 0.0        | 155             | 155            | 0.0        |
| 111467  | 24             | 24            | 0 0.0        | 431             | 76             | 82.4       |
| 111468  | 21             | 21            | 0 0.0        | 181             | 115            | 36.5       |
| 111469  | 27             | 27            | 0 0.0        | 359             | 268            | 25.3       |
| 111470  | 25             | 25            | 0 0.0        | 1036            | 1              | 99.9       |
| 111471  | 16             | 16            | 0 0.0        | 748             | 1              | 99.9       |
| 111472  | 17             | 17            | 0 0.0        | 824             | 1              | 99.9       |
| 111473  | 27             | 27            | 0 0.0        | 666             | 19             | 97.1       |
| 111474  | 18             | 18            | 0 0.0        | 578             | 148            | 74.4       |
| 111475  | 40             | 40            | 0 0.0        | 336             | 279            | 17.0       |
| 111476  | 17             | 17            | 0 0.0        | 2145            | 1              | 100.0      |
| 111477  | 34             | 34            | 0 0.0        | 1000            | 1              | 99.9       |
| 111478  | 32             | 32            | 0 0.0        | 567             | 7              | 98.8       |
| 111479  | 24             | 24            | 0 0.0        | 1018            | 1              | 99.9       |
| 111480  | 23             | 23            | 0 0.0        | 667             | 1              | 99.9       |
| 111481  | 22             | 21            | 1 4.5        | 1341            | 51             | 96.2       |
| 111482  | 20             | 20            | 0 0.0        | 972             | 1              | 99.9       |
| 111483  | 26             | 26            | 0 0.0        | 141             | 100            | 29.1       |
| 111484  | 24             | 24            | 0 0.0        | 252             | 107            | 57.5       |
| 111485  | 33             | 33            | 0 0.0        | 291             | 127            | 56.4       |
| 111486  | 38             | 38            | 0 0.0        | 136             | 77             | 43.4       |
| 111487  | 23             | 23            | 0 0.0        | 735             | 67             | 90.9       |

| Gene-ID | Orth.<br>#taxa | Red.<br>#taxa | Diff.<br># % | Align.<br>#Pos. | Mask.<br>#Pos. | Diff.<br>% |
|---------|----------------|---------------|--------------|-----------------|----------------|------------|
| 111488  | 26             | 26            | 0 0.0        | 390             | 199            | 49.0       |
| 111489  | 27             | 27            | 0 0.0        | 276             | 125            | 54.7       |
| 111490  | 26             | 26            | 0 0.0        | 335             | 109            | 67.5       |
| 111491  | 44             | 44            | 0 0.0        | 225             | 191            | 15.1       |
| 111492  | 33             | 33            | 0 0.0        | 636             | 95             | 85.1       |
| 111493  | 25             | 25            | 0 0.0        | 443             | 64             | 85.6       |
| 111494  | 33             | 33            | 0 0.0        | 1062            | 1              | 99.9       |
| 111495  | 25             | 25            | 0 0.0        | 387             | 157            | 59.4       |
| 111496  | 37             | 37            | 0 0.0        | 233             | 162            | 30.5       |
| 111497  | 30             | 30            | 0 0.0        | 97              | 97             | 0.0        |
| 111498  | 26             | 26            | 0 0.0        | 1000            | 53             | 94.7       |
| 111499  | 40             | 40            | 0 0.0        | 456             | 42             | 90.8       |
| 111500  | 15             | 15            | 0 0.0        | 388             | 153            | 60.6       |
| 111501  | 23             | 23            | 0 0.0        | 397             | 111            | 72.0       |
| 111502  | 22             | 22            | 0 0.0        | 881             | 32             | 96.4       |
| 111503  | 28             | 28            | 0 0.0        | 469             | 84             | 82.1       |
| 111504  | 33             | 30            | 3 9.1        | 214             | 158            | 26.2       |
| 111505  | 29             | 28            | 1 3.4        | 563             | 61             | 89.2       |
| 111506  | 21             | 21            | 0 0.0        | 641             | 203            | 68.3       |
| 111507  | 23             | 23            | 0 0.0        | 321             | 117            | 63.6       |
| 111508  | 21             | 21            | 0 0.0        | 1895            | 1              | 99.9       |
| 111509  | 17             | 17            | 0 0.0        | 500             | 145            | 71.0       |
| 111510  | 39             | 39            | 0 0.0        | 114             | 101            | 11.4       |
| 111511  | 36             | 34            | 2 5.6        | 232             | 138            | 40.5       |
| 111512  | 23             | 23            | 0 0.0        | 583             | 19             | 96.7       |
| 111513  | 21             | 20            | 1 4.8        | 707             | 3              | 99.6       |
| 111514  | 26             | 26            | 0 0.0        | 480             | 32             | 93.3       |
| 111515  | 22             | 22            | 0 0.0        | 632             | 2              | 99.7       |
| 111516  | 36             | 36            | 0 0.0        | 193             | 178            | 7.8        |
| 111517  | 27             | 27            | 0 0.0        | 215             | 148            | 31.2       |
| 111518  | 25             | 25            | 0 0.0        | 220             | 127            | 42.3       |
| 111519  | 29             | 28            | 1 3.4        | 217             | 199            | 8.3        |
| 111520  | 23             | 21            | 2 8.7        | 4669            | 1              | 100.0      |
| 111521  | 32             | 32            | 0 0.0        | 199             | 159            | 20.1       |
| 111522  | 18             | 18            | 0 0.0        | 810             | 94             | 88.4       |
| 111523  | 23             | 23            | 0 0.0        | 550             | 145            | 73.6       |
| 111524  | 38             | 38            | 0 0.0        | 342             | 212            | 38.0       |
| 111525  | 26             | 26            | 0 0.0        | 321             | 56             | 82.6       |
| 111526  | 16             | 16            | 0 0.0        | 1202            | 1              | 99.9       |
| 111527  | 45             | 44            | 1 2.2        | 190             | 165            | 13.2       |
| 111528  | 23             | 23            | 0 0.0        | 1774            | 1              | 99.9       |
| 111529  | 17             | 17            | 0 0.0        | 760             | 5              | 99.3       |
| 111530  | 27             | 26            | 1 3.7        | 360             | 169            | 53.1       |
| 111531  | 18             | 18            | 0 0.0        | 881             | 30             | 96.6       |
| 111532  | 35             | 35            | 0 0.0        | 150             | 144            | 4.0        |
| 111533  | 21             | 21            | 0 0.0        | 555             | 1              | 99.8       |
| 111534  | 20             | 18            | 2 10.0       | 1152            | 133            | 88.5       |
| 111535  | 17             | 17            | 0 0.0        | 631             | 91             | 85.6       |
| 111536  | 19             | 19            | 0 0.0        | 1334            | 1              | 99.9       |
| 111537  | 23             | 23            | 0 0.0        | 1185            | 1              | 99.9       |
| 111538  | 47             | 44            | 3 6.4        | 136             | 136            | 0.0        |
| 111539  | 38             | 38            | 0 0.0        | 365             | 211            | 42.2       |
| 111540  | 24             | 24            | 0 0.0        | 431             | 72             | 83.3       |
| 111541  | 26             | 26            | 0 0.0        | 2671            | 1              | 100.0      |
| 111542  | 37             | 36            | 1 2.7        | 413             | 317            | 23.2       |
| 111543  | 22             | 22            | 0 0.0        | 486             | 85             | 82.5       |
| 111544  | 26             | 21            | 5 19.2       | 869             | 49             | 94.4       |
| 111545  | 17             | 17            | 0 0.0        | 1498            | 1              | 99.9       |
| 111546  | 49             | 49            | 0 0.0        | 176             | 167            | 5.1        |
| 111547  | 21             | 21            | 0 0.0        | 1353            | 1              | 99.9       |
| 111548  | 26             | 26            | 0 0.0        | 595             | 9              | 98.5       |
| 111549  | 34             | 34            | 0 0.0        | 505             | 201            | 60.2       |
| 111550  | 45             | 43            | 2 4.4        | 684             | 88             | 87.1       |
| 111551  | 14             | 14            | 0 0.0        | 1029            | 22             | 97.9       |
| 111552  | 32             | 32            | 0 0.0        | 756             | 174            | 77.0       |
| 111553  | 26             | 26            | 0 0.0        | 426             | 19             | 95.5       |
| 111554  | 22             | 22            | 0 0.0        | 211             | 82             | 61.1       |
| 111555  | 44             | 44            | 0 0.0        | 103             | 94             | 8.7        |
| 111556  | 15             | 13            | 2 13.3       | 729             | 98             | 86.6       |
| 111557  | 30             | 30            | 0 0.0        | 456             | 81             | 82.2       |
| 111558  | 16             | 16            | 0 0.0        | 203             | 182            | 10.3       |
| 111559  | 13             | 13            | 0 0.0        | 762             | 30             | 96.1       |
| 111560  | 24             | 22            | 2 8.3        | 767             | 144            | 81.2       |
| 111561  | 20             | 20            | 0 0.0        | 650             | 37             | 94.3       |
| 111562  | 19             | 19            | 0 0.0        | 1005            | 1              | 99.9       |

| Gene-ID | Orth.<br>#taxa | Red.<br>#taxa | Diff.<br># % | Align.<br>#Pos. | Mask.<br>#Pos. | Diff.<br>% |
|---------|----------------|---------------|--------------|-----------------|----------------|------------|
| 111563  | 39             | 39            | 0 0.0        | 447             | 34             | 92.4       |
| 111564  | 31             | 31            | 0 0.0        | 891             | 1              | 99.9       |
| 111565  | 22             | 17            | 5 22.7       | 1561            | 1              | 99.9       |
| 111566  | 36             | 36            | 0 0.0        | 128             | 115            | 10.2       |
| 111567  | 30             | 30            | 0 0.0        | 289             | 136            | 52.9       |
| 111568  | 33             | 33            | 0 0.0        | 265             | 168            | 36.6       |
| 111569  | 22             | 15            | 7 31.8       | 1304            | 24             | 98.2       |
| 111570  | 26             | 26            | 0 0.0        | 487             | 72             | 85.2       |
| 111571  | 23             | 23            | 0 0.0        | 412             | 157            | 61.9       |
| 111572  | 44             | 44            | 0 0.0        | 331             | 298            | 10.0       |
| 111573  | 18             | 18            | 0 0.0        | 1035            | 198            | 80.9       |
| 111574  | 22             | 21            | 1 4.5        | 969             | 1              | 99.9       |
| 111575  | 23             | 23            | 0 0.0        | 699             | 19             | 97.3       |
| 111576  | 28             | 28            | 0 0.0        | 248             | 140            | 43.5       |
| 111577  | 32             | 32            | 0 0.0        | 930             | 1              | 99.9       |
| 111578  | 16             | 16            | 0 0.0        | 1592            | 1              | 99.9       |
| 111579  | 37             | 36            | 1 2.7        | 271             | 165            | 39.1       |
| 111580  | 25             | 25            | 0 0.0        | 737             | 61             | 91.7       |
| 111581  | 20             | 15            | 5 25.0       | 575             | 1              | 99.8       |
| 111582  | 30             | 30            | 0 0.0        | 509             | 180            | 64.6       |
| 111583  | 25             | 25            | 0 0.0        | 545             | 180            | 67.0       |
| 111584  | 18             | 18            | 0 0.0        | 1227            | 1              | 99.9       |
| 111585  | 32             | 32            | 0 0.0        | 559             | 163            | 70.8       |
| 111586  | 20             | 20            | 0 0.0        | 1247            | 8              | 99.4       |
| 111587  | 39             | 39            | 0 0.0        | 204             | 192            | 5.9        |
| 111588  | 23             | 23            | 0 0.0        | 237             | 153            | 35.4       |
| 111589  | 28             | 26            | 2 7.1        | 592             | 100            | 83.1       |
| 111590  | 16             | 16            | 0 0.0        | 1160            | 41             | 96.5       |
| 111591  | 24             | 21            | 3 12.5       | 751             | 116            | 84.6       |
| 111592  | 18             | 18            | 0 0.0        | 214             | 91             | 57.5       |
| 111593  | 21             | 21            | 0 0.0        | 412             | 98             | 76.2       |
| 111594  | 23             | 23            | 0 0.0        | 546             | 1              | 99.8       |
| 111595  | 40             | 40            | 0 0.0        | 194             | 183            | 5.7        |
| 111596  | 41             | 39            | 2 4.9        | 258             | 176            | 31.8       |
| 111597  | 20             | 20            | 0 0.0        | 370             | 109            | 70.5       |
| 111598  | 32             | 32            | 0 0.0        | 375             | 262            | 30.1       |
| 111599  | 43             | 43            | 0 0.0        | 145             | 145            | 0.0        |
| 111600  | 26             | 26            | 0 0.0        | 213             | 110            | 48.4       |
| 111601  | 25             | 25            | 0 0.0        | 1146            | 1              | 99.9       |
| 111602  | 14             | 14            | 0 0.0        | 485             | 14             | 97.1       |
| 111603  | 33             | 33            | 0 0.0        | 120             | 109            | 9.2        |
| 111604  | 29             | 29            | 0 0.0        | 137             | 120            | 12.4       |
| 111605  | 22             | 22            | 0 0.0        | 410             | 109            | 73.4       |
| 111606  | 25             | 22            | 3 12.0       | 384             | 153            | 60.2       |
| 111607  | 18             | 18            | 0 0.0        | 796             | 106            | 86.7       |
| 111608  | 27             | 27            | 0 0.0        | 315             | 155            | 50.8       |
| 111609  | 22             | 22            | 0 0.0        | 2636            | 1              | 100.0      |
| 111610  | 22             | 22            | 0 0.0        | 1117            | 1              | 99.9       |
| 111611  | 22             | 22            | 0 0.0        | 1114            | 108            | 90.3       |
| 111612  | 30             | 30            | 0 0.0        | 332             | 142            | 57.2       |
| 111613  | 24             | 23            | 1 4.2        | 745             | 1              | 99.9       |
| 111614  | 25             | 25            | 0 0.0        | 446             | 19             | 95.7       |
| 111615  | 17             | 17            | 0 0.0        | 884             | 49             | 94.5       |
| 111616  | 30             | 28            | 2 6.7        | 554             | 144            | 74.0       |
| 111617  | 18             | 18            | 0 0.0        | 2130            | 36             | 98.3       |
| 111618  | 38             | 38            | 0 0.0        | 218             | 209            | 4.1        |
| 111619  | 30             | 30            | 0 0.0        | 269             | 205            | 23.8       |
| 111620  | 29             | 29            | 0 0.0        | 400             | 122            | 69.5       |
| 111621  | 24             | 24            | 0 0.0        | 1650            | 1              | 99.9       |
| 111622  | 49             | 49            | 0 0.0        | 141             | 117            | 17.0       |
| 111623  | 36             | 36            | 0 0.0        | 238             | 202            | 15.1       |
| 111624  | 22             | 22            | 0 0.0        | 621             | 48             | 92.3       |
| 111625  | 26             | 26            | 0 0.0        | 189             | 170            | 10.1       |
| 111626  | 37             | 37            | 0 0.0        | 335             | 293            | 12.5       |
| 111627  | 26             | 26            | 0 0.0        | 592             | 1              | 99.8       |
| 111628  | 30             | 30            | 0 0.0        | 140             | 114            | 18.6       |
| 111629  | 33             | 33            | 0 0.0        | 402             | 199            | 50.5       |
| 111630  | 21             | 21            | 0 0.0        | 660             | 174            | 73.6       |
| 111631  | 30             | 30            | 0 0.0        | 272             | 263            | 3.3        |
| 111632  | 21             | 21            | 0 0.0        | 446             | 13             | 97.1       |
| 111633  | 19             | 19            | 0 0.0        | 573             | 1              | 99.8       |
| 111634  | 34             | 34            | 0 0.0        | 412             | 178            | 56.8       |
| 111635  | 26             | 26            | 0 0.0        | 425             | 54             | 87.3       |
| 111636  | 26             | 26            | 0 0.0        | 349             | 248            | 28.9       |
| 111637  | 26             | 26            | 0 0.0        | 393             | 59             | 85.0       |

| Gene-ID | Orth.<br>#taxa | Red.<br>#taxa | Diff.<br># % | Align.<br>#Pos. | Mask.<br>#Pos. | Diff.<br>% |
|---------|----------------|---------------|--------------|-----------------|----------------|------------|
| 111638  | 35             | 34            | 1 2.9        | 248             | 129            | 48.0       |
| 111639  | 31             | 31            | 0 0.0        | 155             | 77             | 50.3       |
| 111640  | 22             | 14            | 8 36.4       | 783             | 1              | 99.9       |
| 111641  | 28             | 28            | 0 0.0        | 492             | 104            | 78.9       |
| 111642  | 23             | 23            | 0 0.0        | 813             | 1              | 99.9       |
| 111643  | 29             | 28            | 1 3.4        | 463             | 329            | 28.9       |
| 111644  | 30             | 30            | 0 0.0        | 565             | 83             | 85.3       |
| 111645  | 22             | 22            | 0 0.0        | 880             | 5              | 99.4       |
| 111646  | 25             | 25            | 0 0.0        | 1048            | 59             | 94.4       |
| 111647  | 17             | 17            | 0 0.0        | 378             | 111            | 70.6       |
| 111648  | 30             | 30            | 0 0.0        | 336             | 166            | 50.6       |
| 111649  | 15             | 15            | 0 0.0        | 722             | 36             | 95.0       |
| 111650  | 20             | 20            | 0 0.0        | 921             | 5              | 99.5       |
| 111651  | 22             | 22            | 0 0.0        | 330             | 92             | 72.1       |
| 111652  | 20             | 18            | 2 10.0       | 712             | 57             | 92.0       |
| 111653  | 27             | 27            | 0 0.0        | 199             | 124            | 37.7       |
| 111654  | 27             | 27            | 0 0.0        | 421             | 97             | 77.0       |
| 111655  | 26             | 26            | 0 0.0        | 912             | 26             | 97.1       |
| 111656  | 17             | 17            | 0 0.0        | 2333            | 1              | 100.0      |
| 111657  | 50             | 50            | 0 0.0        | 179             | 152            | 15.1       |
| 111658  | 17             | 17            | 0 0.0        | 231             | 69             | 70.1       |
| 111659  | 18             | 18            | 0 0.0        | 218             | 109            | 50.0       |
| 111660  | 23             | 23            | 0 0.0        | 240             | 110            | 54.2       |
| 111661  | 27             | 27            | 0 0.0        | 261             | 165            | 36.8       |
| 111662  | 21             | 21            | 0 0.0        | 276             | 149            | 46.0       |
| 111663  | 31             | 30            | 1 3.2        | 531             | 104            | 80.4       |
| 111664  | 28             | 24            | 4 14.3       | 632             | 1              | 99.8       |
| 111665  | 21             | 21            | 0 0.0        | 177             | 177            | 0.0        |
| 111666  | 24             | 24            | 0 0.0        | 398             | 1              | 99.7       |
| 111667  | 22             | 21            | 1 4.5        | 692             | 1              | 99.9       |
| 111668  | 28             | 28            | 0 0.0        | 201             | 189            | 6.0        |
| 111669  | 29             | 29            | 0 0.0        | 508             | 30             | 94.1       |
| 111670  | 27             | 27            | 0 0.0        | 492             | 80             | 83.7       |
| 111671  | 26             | 26            | 0 0.0        | 412             | 48             | 88.3       |
| 111672  | 16             | 16            | 0 0.0        | 560             | 83             | 85.2       |
| 111673  | 33             | 33            | 0 0.0        | 454             | 5              | 98.9       |
| 111674  | 20             | 20            | 0 0.0        | 1135            | 5              | 99.6       |
| 111675  | 17             | 17            | 0 0.0        | 474             | 1              | 99.8       |
| 111676  | 38             | 29            | 9 23.7       | 217             | 155            | 28.6       |
| 111677  | 28             | 28            | 0 0.0        | 396             | 150            | 62.1       |
| 111678  | 35             | 35            | 0 0.0        | 146             | 109            | 25.3       |
| 111679  | 28             | 28            | 0 0.0        | 900             | 24             | 97.3       |
| 111680  | 24             | 24            | 0 0.0        | 402             | 127            | 68.4       |
| 111681  | 38             | 38            | 0 0.0        | 630             | 1              | 99.8       |
| 111682  | 26             | 26            | 0 0.0        | 840             | 4              | 99.5       |
| 111683  | 15             | 14            | 1 6.7        | 724             | 53             | 92.7       |
| 111684  | 26             | 26            | 0 0.0        | 883             | 1              | 99.9       |
| 111685  | 24             | 24            | 0 0.0        | 586             | 1              | 99.8       |
| 111686  | 39             | 38            | 1 2.6        | 362             | 213            | 41.2       |
| 111687  | 45             | 45            | 0 0.0        | 458             | 398            | 13.1       |
| 111688  | 17             | 17            | 0 0.0        | 1114            | 1              | 99.9       |
| 111689  | 39             | 39            | 0 0.0        | 594             | 55             | 90.7       |
| 111690  | 24             | 24            | 0 0.0        | 371             | 72             | 80.6       |
| 111691  | 19             | 19            | 0 0.0        | 1064            | 1              | 99.9       |
| 111692  | 25             | 22            | 3 12.0       | 1417            | 1              | 99.9       |
| 111693  | 18             | 18            | 0 0.0        | 425             | 1              | 99.8       |
| 111694  | 23             | 23            | 0 0.0        | 669             | 1              | 99.9       |
| 111695  | 35             | 32            | 3 8.6        | 689             | 134            | 80.6       |
| 111696  | 27             | 27            | 0 0.0        | 872             | 9              | 99.0       |
| 111697  | 23             | 23            | 0 0.0        | 808             | 1              | 99.9       |
| 111698  | 22             | 22            | 0 0.0        | 437             | 183            | 58.1       |
| 111699  | 27             | 27            | 0 0.0        | 188             | 73             | 61.2       |
| 111700  | 22             | 22            | 0 0.0        | 619             | 130            | 79.0       |
| 111701  | 23             | 23            | 0 0.0        | 1335            | 1              | 99.9       |
| 111702  | 39             | 39            | 0 0.0        | 132             | 132            | 0.0        |
| 111703  | 30             | 30            | 0 0.0        | 223             | 119            | 46.6       |
| 111704  | 23             | 23            | 0 0.0        | 410             | 141            | 65.6       |
| 111705  | 27             | 27            | 0 0.0        | 336             | 186            | 44.6       |
| 111706  | 23             | 23            | 0 0.0        | 564             | 55             | 90.2       |
| 111707  | 21             | 21            | 0 0.0        | 148             | 91             | 38.5       |
| 111708  | 22             | 22            | 0 0.0        | 503             | 11             | 97.8       |
| 111709  | 27             | 27            | 0 0.0        | 242             | 98             | 59.5       |
| 111710  | 21             | 21            | 0 0.0        | 2873            | 1              | 100.0      |
| 111711  | 47             | 46            | 1 2.1        | 170             | 130            | 23.5       |
| 111712  | 23             | 23            | 0 0.0        | 678             | 3              | 99.6       |

| Gene-ID | Orth.<br>#taxa | Red.<br>#taxa | Diff.<br># % | Align.<br>#Pos. | Mask.<br>#Pos. | Diff.<br>% |
|---------|----------------|---------------|--------------|-----------------|----------------|------------|
| 111713  | 26             | 26            | 0 0.0        | 658             | 29             | 95.6       |
| 111714  | 38             | 37            | 1 2.6        | 318             | 195            | 38.7       |
| 111715  | 23             | 23            | 0 0.0        | 276             | 148            | 46.4       |
| 111716  | 13             | 13            | 0 0.0        | 1592            | 25             | 98.4       |
| 111717  | 21             | 21            | 0 0.0        | 622             | 123            | 80.2       |
| 111718  | 15             | 15            | 0 0.0        | 655             | 7              | 98.9       |
| 111719  | 22             | 22            | 0 0.0        | 877             | 1              | 99.9       |
| 111720  | 14             | 14            | 0 0.0        | 675             | 143            | 78.8       |
| 111721  | 28             | 28            | 0 0.0        | 573             | 62             | 89.2       |
| 111722  | 29             | 29            | 0 0.0        | 1251            | 1              | 99.9       |
| 111723  | 36             | 36            | 0 0.0        | 348             | 98             | 71.8       |
| 111724  | 43             | 43            | 0 0.0        | 191             | 163            | 14.7       |
| 111725  | 13             | 13            | 0 0.0        | 831             | 43             | 94.8       |
| 111726  | 25             | 25            | 0 0.0        | 1450            | 1              | 99.9       |
| 111727  | 23             | 23            | 0 0.0        | 621             | 37             | 94.0       |
| 111728  | 26             | 24            | 2 7.7        | 292             | 202            | 30.8       |
| 111729  | 20             | 20            | 0 0.0        | 696             | 115            | 83.5       |
| 111730  | 35             | 35            | 0 0.0        | 463             | 317            | 31.5       |
| 111731  | 36             | 36            | 0 0.0        | 313             | 193            | 38.3       |
| 111732  | 36             | 36            | 0 0.0        | 750             | 93             | 87.6       |
| 111733  | 37             | 37            | 0 0.0        | 127             | 115            | 9.4        |
| 111734  | 32             | 32            | 0 0.0        | 504             | 35             | 93.1       |
| 111735  | 26             | 26            | 0 0.0        | 426             | 67             | 84.3       |
| 111736  | 25             | 25            | 0 0.0        | 283             | 138            | 51.2       |
| 111737  | 22             | 22            | 0 0.0        | 419             | 9              | 97.9       |
| 111738  | 30             | 30            | 0 0.0        | 174             | 163            | 6.3        |
| 111739  | 25             | 25            | 0 0.0        | 495             | 82             | 83.4       |
| 111740  | 24             | 24            | 0 0.0        | 635             | 1              | 99.8       |
| 111741  | 35             | 35            | 0 0.0        | 239             | 147            | 38.5       |
| 111742  | 26             | 26            | 0 0.0        | 592             | 70             | 88.2       |
| 111743  | 14             | 14            | 0 0.0        | 561             | 35             | 93.8       |
| 111744  | 47             | 47            | 0 0.0        | 221             | 213            | 3.6        |
| 111745  | 23             | 23            | 0 0.0        | 910             | 1              | 99.9       |
| 111746  | 19             | 19            | 0 0.0        | 558             | 134            | 76.0       |
| 111747  | 27             | 27            | 0 0.0        | 308             | 136            | 55.8       |
| 111748  | 20             | 20            | 0 0.0        | 445             | 170            | 61.8       |
| 111749  | 25             | 25            | 0 0.0        | 723             | 72             | 90.0       |
| 111750  | 18             | 18            | 0 0.0        | 244             | 73             | 70.1       |
| 111751  | 19             | 19            | 0 0.0        | 442             | 80             | 81.9       |
| 111752  | 36             | 36            | 0 0.0        | 454             | 269            | 40.7       |
| 111753  | 24             | 22            | 2 8.3        | 998             | 28             | 97.2       |
| 111754  | 30             | 30            | 0 0.0        | 384             | 109            | 71.6       |
| 111755  | 23             | 23            | 0 0.0        | 598             | 1              | 99.8       |
| 111756  | 21             | 21            | 0 0.0        | 960             | 1              | 99.9       |
| 111757  | 26             | 26            | 0 0.0        | 2090            | 1              | 100.0      |
| 111758  | 22             | 22            | 0 0.0        | 300             | 5              | 98.3       |
| 111759  | 27             | 27            | 0 0.0        | 875             | 1              | 99.9       |
| 111760  | 35             | 35            | 0 0.0        | 571             | 20             | 96.5       |
| 111761  | 30             | 29            | 1 3.3        | 2416            | 1              | 100.0      |
| 111762  | 18             | 18            | 0 0.0        | 1212            | 1              | 99.9       |
| 111763  | 40             | 40            | 0 0.0        | 261             | 218            | 16.5       |
| 111764  | 32             | 32            | 0 0.0        | 247             | 183            | 25.9       |
| 111765  | 22             | 22            | 0 0.0        | 632             | 23             | 96.4       |
| 111766  | 27             | 27            | 0 0.0        | 411             | 34             | 91.7       |
| 111767  | 26             | 26            | 0 0.0        | 122             | 113            | 7.4        |
| 111768  | 34             | 34            | 0 0.0        | 222             | 174            | 21.6       |
| 111769  | 28             | 27            | 1 3.6        | 183             | 99             | 45.9       |
| 111770  | 24             | 24            | 0 0.0        | 373             | 84             | 77.5       |
| 111771  | 31             | 31            | 0 0.0        | 254             | 164            | 35.4       |
| 111772  | 20             | 20            | 0 0.0        | 134             | 109            | 18.7       |
| 111773  | 33             | 32            | 1 3.0        | 542             | 20             | 96.3       |
| 111774  | 32             | 32            | 0 0.0        | 613             | 30             | 95.1       |
| 111775  | 42             | 42            | 0 0.0        | 439             | 279            | 36.4       |
| 111776  | 40             | 40            | 0 0.0        | 200             | 177            | 11.5       |
| 111777  | 34             | 32            | 2 5.9        | 533             | 1              | 99.8       |
| 111778  | 29             | 29            | 0 0.0        | 461             | 123            | 73.3       |
| 111779  | 24             | 24            | 0 0.0        | 281             | 189            | 32.7       |
| 111780  | 22             | 17            | 5 22.7       | 1079            | 50             | 95.4       |
| 111781  | 26             | 26            | 0 0.0        | 139             | 95             | 31.7       |
| 111782  | 26             | 26            | 0 0.0        | 513             | 101            | 80.3       |
| 111783  | 27             | 27            | 0 0.0        | 1146            | 1              | 99.9       |
| 111784  | 22             | 22            | 0 0.0        | 385             | 95             | 75.3       |
| 111785  | 32             | 32            | 0 0.0        | 102             | 67             | 34.3       |
| 111786  | 28             | 25            | 3 10.7       | 340             | 111            | 67.4       |
| 111787  | 26             | 26            | 0 0.0        | 222             | 173            | 22.1       |

| Gene-ID | Orth.<br>#taxa | Red.<br>#taxa | Diff.<br># % | Align.<br>#Pos. | Mask.<br>#Pos. | Diff.<br>% |
|---------|----------------|---------------|--------------|-----------------|----------------|------------|
| 111788  | 29             | 29            | 0 0.0        | 465             | 47             | 89.9       |
| 111789  | 32             | 32            | 0 0.0        | 68              | 68             | 0.0        |
| 111790  | 13             | 13            | 0 0.0        | 852             | 96             | 88.7       |
| 111791  | 26             | 26            | 0 0.0        | 567             | 2              | 99.6       |
| 111792  | 19             | 19            | 0 0.0        | 919             | 1              | 99.9       |
| 111793  | 17             | 17            | 0 0.0        | 370             | 90             | 75.7       |
| 111794  | 32             | 31            | 1 3.1        | 1038            | 1              | 99.9       |
| 111795  | 23             | 23            | 0 0.0        | 920             | 1              | 99.9       |
| 111796  | 25             | 25            | 0 0.0        | 148             | 82             | 44.6       |
| 111797  | 35             | 35            | 0 0.0        | 83              | 83             | 0.0        |
| 111798  | 23             | 23            | 0 0.0        | 925             | 3              | 99.7       |
| 111799  | 35             | 35            | 0 0.0        | 406             | 1              | 99.8       |
| 111800  | 23             | 23            | 0 0.0        | 355             | 1              | 99.7       |
| 111801  | 14             | 14            | 0 0.0        | 1368            | 1              | 99.9       |
| 111802  | 22             | 22            | 0 0.0        | 2356            | 1              | 100.0      |
| 111803  | 29             | 29            | 0 0.0        | 249             | 211            | 15.3       |
| 111804  | 23             | 23            | 0 0.0        | 548             | 4              | 99.3       |
| 111805  | 14             | 14            | 0 0.0        | 1003            | 24             | 97.6       |
| 111806  | 32             | 30            | 2 6.3        | 694             | 13             | 98.1       |
| 111807  | 27             | 26            | 1 3.7        | 177             | 114            | 35.6       |
| 111808  | 18             | 18            | 0 0.0        | 373             | 77             | 79.4       |
| 111809  | 26             | 26            | 0 0.0        | 198             | 110            | 44.4       |
| 111810  | 25             | 21            | 4 16.0       | 992             | 1              | 99.9       |
| 111811  | 46             | 46            | 0 0.0        | 172             | 111            | 35.5       |
| 111812  | 26             | 26            | 0 0.0        | 502             | 203            | 59.6       |
| 111813  | 43             | 43            | 0 0.0        | 291             | 174            | 40.2       |
| 111814  | 45             | 45            | 0 0.0        | 196             | 184            | 6.1        |
| 111815  | 39             | 39            | 0 0.0        | 131             | 131            | 0.0        |
| 111816  | 44             | 44            | 0 0.0        | 111             | 105            | 5.4        |
| 111817  | 27             | 27            | 0 0.0        | 261             | 160            | 38.7       |
| 111818  | 34             | 28            | 6 17.6       | 822             | 127            | 84.5       |
| 111819  | 26             | 26            | 0 0.0        | 808             | 71             | 91.2       |
| 111820  | 33             | 33            | 0 0.0        | 272             | 235            | 13.6       |
| 111821  | 26             | 26            | 0 0.0        | 459             | 78             | 83.0       |
| 111822  | 21             | 21            | 0 0.0        | 965             | 1              | 99.9       |
| 111823  | 21             | 21            | 0 0.0        | 527             | 1              | 99.8       |
| 111824  | 19             | 19            | 0 0.0        | 681             | 21             | 96.9       |
| 111825  | 26             | 26            | 0 0.0        | 290             | 145            | 50.0       |
| 111826  | 12             | 12            | 0 0.0        | 1131            | 14             | 98.8       |
| 111827  | 29             | 29            | 0 0.0        | 745             | 101            | 86.4       |
| 111828  | 21             | 21            | 0 0.0        | 435             | 37             | 91.5       |
| 111829  | 41             | 41            | 0 0.0        | 135             | 104            | 23.0       |
| 111830  | 42             | 42            | 0 0.0        | 93              | 85             | 8.6        |
| 111831  | 24             | 24            | 0 0.0        | 1293            | 1              | 99.9       |
| 111832  | 24             | 24            | 0 0.0        | 976             | 1              | 99.9       |
| 111833  | 25             | 25            | 0 0.0        | 275             | 134            | 51.3       |
| 111834  | 20             | 20            | 0 0.0        | 1043            | 1              | 99.9       |
| 111835  | 25             | 25            | 0 0.0        | 1183            | 26             | 97.8       |
| 111836  | 21             | 21            | 0 0.0        | 403             | 117            | 71.0       |
| 111837  | 22             | 22            | 0 0.0        | 1298            | 41             | 96.8       |
| 111838  | 22             | 22            | 0 0.0        | 225             | 175            | 22.2       |
| 111839  | 26             | 26            | 0 0.0        | 415             | 9              | 97.8       |
| 111840  | 30             | 30            | 0 0.0        | 80              | 70             | 12.5       |
| 111841  | 24             | 24            | 0 0.0        | 322             | 103            | 68.0       |
| 111842  | 24             | 24            | 0 0.0        | 354             | 117            | 66.9       |
| 111843  | 22             | 22            | 0 0.0        | 971             | 32             | 96.7       |
| 111844  | 35             | 35            | 0 0.0        | 691             | 102            | 85.2       |
| 111845  | 20             | 20            | 0 0.0        | 152             | 137            | 9.9        |
| 111846  | 24             | 24            | 0 0.0        | 501             | 1              | 99.8       |
| 111847  | 28             | 28            | 0 0.0        | 180             | 102            | 43.3       |
| 111848  | 31             | 31            | 0 0.0        | 209             | 158            | 24.4       |
| 111849  | 35             | 35            | 0 0.0        | 320             | 220            | 31.3       |
| 111850  | 20             | 20            | 0 0.0        | 1217            | 4              | 99.7       |
| 111851  | 29             | 29            | 0 0.0        | 479             | 44             | 90.8       |
| 111852  | 30             | 30            | 0 0.0        | 1169            | 1              | 99.9       |
| 111853  | 25             | 14            | 11 44.0      | 475             | 5              | 98.9       |
| 111854  | 24             | 24            | 0 0.0        | 584             | 1              | 99.8       |
| 111855  | 23             | 23            | 0 0.0        | 1375            | 1              | 99.9       |
| 111856  | 29             | 29            | 0 0.0        | 951             | 39             | 95.9       |
| 111857  | 30             | 29            | 1 3.3        | 302             | 80             | 73.5       |
| 111858  | 17             | 17            | 0 0.0        | 404             | 105            | 74.0       |
| 111859  | 18             | 18            | 0 0.0        | 627             | 18             | 97.1       |
| 111860  | 15             | 15            | 0 0.0        | 1427            | 1              | 99.9       |
| 111861  | 42             | 42            | 0 0.0        | 164             | 135            | 17.7       |
| 111862  | 30             | 30            | 0 0.0        | 200             | 148            | 26.0       |

| Gene-ID | Orth.<br>#taxa | Red.<br>#taxa | Diff.<br># % | Align.<br>#Pos. | Mask.<br>#Pos. | Diff.<br>% |
|---------|----------------|---------------|--------------|-----------------|----------------|------------|
| 111863  | 31             | 31            | 0 0.0        | 509             | 142            | 72.1       |
| 111864  | 26             | 26            | 0 0.0        | 454             | 14             | 96.9       |
| 111865  | 25             | 24            | 1 4.0        | 197             | 132            | 33.0       |
| 111866  | 40             | 40            | 0 0.0        | 169             | 146            | 13.6       |
| 111867  | 18             | 18            | 0 0.0        | 577             | 38             | 93.4       |
| 111868  | 17             | 17            | 0 0.0        | 620             | 1              | 99.8       |
| 111869  | 26             | 26            | 0 0.0        | 721             | 14             | 98.1       |
| 111870  | 30             | 30            | 0 0.0        | 190             | 118            | 37.9       |
| 111871  | 27             | 27            | 0 0.0        | 346             | 154            | 55.5       |
| 111872  | 33             | 26            | 7 21.2       | 794             | 84             | 89.4       |
| 111873  | 45             | 45            | 0 0.0        | 266             | 218            | 18.0       |
| 111874  | 29             | 29            | 0 0.0        | 606             | 104            | 82.8       |
| 111875  | 18             | 16            | 2 11.1       | 654             | 22             | 96.6       |
| 111876  | 35             | 35            | 0 0.0        | 263             | 59             | 77.6       |
| 111877  | 21             | 21            | 0 0.0        | 358             | 25             | 93.0       |
| 111878  | 26             | 26            | 0 0.0        | 520             | 55             | 89.4       |
| 111879  | 22             | 22            | 0 0.0        | 416             | 161            | 61.3       |
| 111880  | 26             | 26            | 0 0.0        | 401             | 66             | 83.5       |
| 111881  | 18             | 18            | 0 0.0        | 2044            | 17             | 99.2       |
| 111882  | 25             | 25            | 0 0.0        | 852             | 21             | 97.5       |
| 111883  | 24             | 24            | 0 0.0        | 322             | 192            | 40.4       |
| 111884  | 26             | 23            | 3 11.5       | 837             | 72             | 91.4       |
| 111885  | 20             | 20            | 0 0.0        | 402             | 215            | 46.5       |
| 111886  | 19             | 19            | 0 0.0        | 1001            | 9              | 99.1       |
| 111887  | 24             | 24            | 0 0.0        | 1054            | 1              | 99.9       |
| 111888  | 25             | 21            | 4 16.0       | 847             | 1              | 99.9       |
| 111889  | 28             | 28            | 0 0.0        | 229             | 190            | 17.0       |
| 111890  | 21             | 21            | 0 0.0        | 538             | 78             | 85.5       |
| 111891  | 24             | 24            | 0 0.0        | 1064            | 1              | 99.9       |
| 111892  | 31             | 31            | 0 0.0        | 484             | 71             | 85.3       |
| 111893  | 42             | 42            | 0 0.0        | 67              | 67             | 0.0        |
| 111894  | 23             | 23            | 0 0.0        | 387             | 141            | 63.6       |
| 111895  | 25             | 25            | 0 0.0        | 640             | 8              | 98.8       |
| 111896  | 31             | 31            | 0 0.0        | 271             | 91             | 66.4       |
| 111897  | 16             | 15            | 1 6.3        | 731             | 6              | 99.2       |
| 111898  | 41             | 41            | 0 0.0        | 245             | 216            | 11.8       |
| 111899  | 21             | 21            | 0 0.0        | 586             | 42             | 92.8       |
| 111900  | 26             | 26            | 0 0.0        | 197             | 133            | 32.5       |
| 111901  | 24             | 24            | 0 0.0        | 405             | 11             | 97.3       |
| 111902  | 21             | 21            | 0 0.0        | 580             | 69             | 88.1       |
| 111903  | 25             | 25            | 0 0.0        | 750             | 75             | 90.0       |
| 111904  | 35             | 33            | 2 5.7        | 574             | 124            | 78.4       |
| 111905  | 24             | 24            | 0 0.0        | 353             | 152            | 56.9       |
| 111906  | 29             | 29            | 0 0.0        | 598             | 56             | 90.6       |
| 111907  | 39             | 39            | 0 0.0        | 313             | 178            | 43.1       |
| 111908  | 15             | 15            | 0 0.0        | 949             | 1              | 99.9       |
| 111909  | 21             | 16            | 5 23.8       | 1297            | 58             | 95.5       |
| 111910  | 17             | 17            | 0 0.0        | 1327            | 1              | 99.9       |
| 111911  | 27             | 26            | 1 3.7        | 4373            | 1              | 100.0      |
| 111912  | 23             | 23            | 0 0.0        | 316             | 207            | 34.5       |
| 111913  | 28             | 28            | 0 0.0        | 626             | 1              | 99.8       |
| 111914  | 30             | 23            | 7 23.3       | 394             | 1              | 99.7       |
| 111915  | 27             | 27            | 0 0.0        | 812             | 1              | 99.9       |
| 111916  | 32             | 32            | 0 0.0        | 537             | 148            | 72.4       |
| 111917  | 48             | 48            | 0 0.0        | 164             | 122            | 25.6       |
| 111918  | 17             | 17            | 0 0.0        | 590             | 18             | 96.9       |
| 111919  | 23             | 23            | 0 0.0        | 307             | 125            | 59.3       |
| 111920  | 21             | 19            | 2 9.5        | 2733            | 1              | 100.0      |
| 111921  | 28             | 28            | 0 0.0        | 578             | 1              | 99.8       |
| 111922  | 20             | 20            | 0 0.0        | 369             | 179            | 51.5       |
| 111923  | 28             | 28            | 0 0.0        | 866             | 56             | 93.5       |
| 111924  | 23             | 20            | 3 13.0       | 687             | 102            | 85.2       |
| 111925  | 35             | 35            | 0 0.0        | 351             | 121            | 65.5       |
| 111926  | 30             | 30            | 0 0.0        | 507             | 49             | 90.3       |
| 111927  | 27             | 27            | 0 0.0        | 698             | 1              | 99.9       |
| 111928  | 28             | 28            | 0 0.0        | 605             | 1              | 99.8       |
| 111929  | 35             | 35            | 0 0.0        | 627             | 3              | 99.5       |
| 111930  | 34             | 34            | 0 0.0        | 379             | 33             | 91.3       |
| 111931  | 34             | 33            | 1 2.9        | 390             | 107            | 72.6       |
| 111932  | 27             | 27            | 0 0.0        | 998             | 1              | 99.9       |
| 111933  | 24             | 24            | 0 0.0        | 380             | 72             | 81.1       |
| 111934  | 19             | 18            | 1 5.3        | 1862            | 1              | 99.9       |
| 111935  | 50             | 50            | 0 0.0        | 298             | 167            | 44.0       |
| 111936  | 34             | 34            | 0 0.0        | 236             | 159            | 32.6       |
| 111937  | 20             | 20            | 0 0.0        | 814             | 1              | 99.9       |



| Gene-ID | Orth.<br>#taxa | Red.<br>#taxa | Diff.<br># % | Align.<br>#Pos. | Mask.<br>#Pos. | Diff.<br>% |
|---------|----------------|---------------|--------------|-----------------|----------------|------------|
| 111938  | 30             | 30            | 0 0.0        | 201             | 112            | 44.3       |
| 111939  | 31             | 31            | 0 0.0        | 514             | 177            | 65.6       |
| 111940  | 26             | 24            | 2 7.7        | 524             | 99             | 81.1       |
| 111941  | 19             | 19            | 0 0.0        | 661             | 38             | 94.3       |
| 111942  | 24             | 23            | 1 4.2        | 644             | 48             | 92.5       |
| 111943  | 21             | 21            | 0 0.0        | 1211            | 1              | 99.9       |
| 111944  | 20             | 20            | 0 0.0        | 348             | 57             | 83.6       |
| 111945  | 43             | 43            | 0 0.0        | 182             | 182            | 0.0        |
| 111946  | 26             | 26            | 0 0.0        | 267             | 191            | 28.5       |
| 111947  | 26             | 26            | 0 0.0        | 1233            | 1              | 99.9       |
| 111948  | 24             | 24            | 0 0.0        | 364             | 220            | 39.6       |
| 111949  | 23             | 23            | 0 0.0        | 1258            | 1              | 99.9       |
| 111950  | 26             | 26            | 0 0.0        | 395             | 127            | 67.8       |
| 111951  | 22             | 22            | 0 0.0        | 192             | 133            | 30.7       |
| 111952  | 30             | 30            | 0 0.0        | 158             | 60             | 62.0       |
| 111953  | 31             | 31            | 0 0.0        | 434             | 162            | 62.7       |
| 111954  | 22             | 22            | 0 0.0        | 648             | 45             | 93.1       |
| 111955  | 18             | 18            | 0 0.0        | 582             | 127            | 78.2       |
| 111956  | 44             | 44            | 0 0.0        | 108             | 101            | 6.5        |
| 111957  | 25             | 25            | 0 0.0        | 422             | 103            | 75.6       |
| 111958  | 29             | 29            | 0 0.0        | 306             | 203            | 33.7       |
| 111959  | 32             | 32            | 0 0.0        | 207             | 156            | 24.6       |
| 111960  | 31             | 31            | 0 0.0        | 179             | 166            | 7.3        |
| 111961  | 26             | 26            | 0 0.0        | 738             | 28             | 96.2       |
| 111962  | 34             | 34            | 0 0.0        | 111             | 111            | 0.0        |
| 111963  | 21             | 20            | 1 4.8        | 698             | 141            | 79.8       |
| 111964  | 21             | 21            | 0 0.0        | 493             | 197            | 60.0       |
| 111965  | 21             | 21            | 0 0.0        | 2424            | 48             | 98.0       |
| 111966  | 24             | 24            | 0 0.0        | 299             | 68             | 77.3       |
| 111967  | 21             | 21            | 0 0.0        | 753             | 1              | 99.9       |
| 111968  | 34             | 32            | 2 5.9        | 656             | 100            | 84.8       |
| 111969  | 32             | 32            | 0 0.0        | 209             | 113            | 45.9       |
| 111970  | 23             | 23            | 0 0.0        | 483             | 68             | 85.9       |
| 111971  | 23             | 23            | 0 0.0        | 292             | 153            | 47.6       |
| 111972  | 18             | 18            | 0 0.0        | 251             | 169            | 32.7       |
| 111973  | 33             | 33            | 0 0.0        | 169             | 121            | 28.4       |
| 111974  | 17             | 17            | 0 0.0        | 690             | 1              | 99.9       |
| 111975  | 22             | 22            | 0 0.0        | 1002            | 49             | 95.1       |
| 111976  | 21             | 21            | 0 0.0        | 741             | 4              | 99.5       |
| 111977  | 16             | 16            | 0 0.0        | 1313            | 1              | 99.9       |
| 111978  | 23             | 23            | 0 0.0        | 405             | 15             | 96.3       |
| 111979  | 18             | 18            | 0 0.0        | 778             | 22             | 97.2       |
| 111980  | 20             | 20            | 0 0.0        | 913             | 1              | 99.9       |
| 111981  | 32             | 30            | 2 6.3        | 337             | 220            | 34.7       |
| 111982  | 17             | 17            | 0 0.0        | 215             | 146            | 32.1       |
| 111983  | 29             | 29            | 0 0.0        | 686             | 115            | 83.2       |
| 111984  | 31             | 31            | 0 0.0        | 374             | 178            | 52.4       |
| 111985  | 22             | 22            | 0 0.0        | 935             | 33             | 96.5       |
| 111986  | 27             | 27            | 0 0.0        | 308             | 38             | 87.7       |
| 111987  | 24             | 24            | 0 0.0        | 226             | 86             | 61.9       |
| 111988  | 40             | 40            | 0 0.0        | 339             | 248            | 26.8       |
| 111989  | 46             | 46            | 0 0.0        | 290             | 250            | 13.8       |
| 111990  | 19             | 19            | 0 0.0        | 217             | 101            | 53.5       |
| 111991  | 24             | 24            | 0 0.0        | 786             | 83             | 89.4       |
| 111992  | 21             | 20            | 1 4.8        | 196             | 139            | 29.1       |
| 111993  | 16             | 16            | 0 0.0        | 752             | 1              | 99.9       |
| 111994  | 18             | 18            | 0 0.0        | 269             | 137            | 49.1       |
| 111995  | 32             | 32            | 0 0.0        | 424             | 161            | 62.0       |
| 111996  | 33             | 30            | 3 9.1        | 981             | 7              | 99.3       |
| 111997  | 24             | 24            | 0 0.0        | 378             | 173            | 54.2       |
| 111998  | 38             | 35            | 3 7.9        | 170             | 142            | 16.5       |
| 111999  | 24             | 23            | 1 4.2        | 1053            | 1              | 99.9       |
| 112000  | 26             | 25            | 1 3.8        | 426             | 116            | 72.8       |
| 112001  | 30             | 30            | 0 0.0        | 538             | 1              | 99.8       |
| 112002  | 34             | 34            | 0 0.0        | 394             | 104            | 73.6       |
| 112003  | 42             | 42            | 0 0.0        | 445             | 321            | 27.9       |
| 112004  | 25             | 25            | 0 0.0        | 258             | 75             | 70.9       |
| 112005  | 22             | 22            | 0 0.0        | 629             | 44             | 93.0       |
| 112006  | 15             | 15            | 0 0.0        | 604             | 119            | 80.3       |
| 112007  | 28             | 28            | 0 0.0        | 210             | 140            | 33.3       |
| 112008  | 19             | 19            | 0 0.0        | 3537            | 21             | 99.4       |
| 112009  | 22             | 21            | 1 4.5        | 761             | 1              | 99.9       |
| 112010  | 14             | 14            | 0 0.0        | 565             | 1              | 99.8       |
| 112011  | 28             | 28            | 0 0.0        | 400             | 256            | 36.0       |
| 112012  | 30             | 30            | 0 0.0        | 458             | 144            | 68.6       |

| Gene-ID | Orth.<br>#taxa | Red.<br>#taxa | Diff.<br># % | Align.<br>#Pos. | Mask.<br>#Pos. | Diff.<br>% |
|---------|----------------|---------------|--------------|-----------------|----------------|------------|
| 112013  | 27             | 26            | 1 3.7        | 480             | 240            | 50.0       |
| 112014  | 21             | 21            | 0 0.0        | 594             | 70             | 88.2       |
| 112015  | 20             | 20            | 0 0.0        | 2738            | 58             | 97.9       |
| 112016  | 23             | 23            | 0 0.0        | 346             | 112            | 67.6       |
| 112017  | 25             | 25            | 0 0.0        | 632             | 98             | 84.5       |
| 112018  | 24             | 24            | 0 0.0        | 383             | 152            | 60.3       |
| 112019  | 26             | 26            | 0 0.0        | 991             | 1              | 99.9       |
| 112020  | 25             | 25            | 0 0.0        | 208             | 167            | 19.7       |
| 112021  | 20             | 20            | 0 0.0        | 408             | 93             | 77.2       |
| 112022  | 34             | 34            | 0 0.0        | 557             | 1              | 99.8       |
| 112023  | 29             | 29            | 0 0.0        | 660             | 1              | 99.8       |
| 112024  | 23             | 23            | 0 0.0        | 567             | 48             | 91.5       |
| 112025  | 26             | 26            | 0 0.0        | 1049            | 1              | 99.9       |
| 112026  | 23             | 23            | 0 0.0        | 366             | 138            | 62.3       |
| 112027  | 15             | 15            | 0 0.0        | 504             | 25             | 95.0       |
| 112028  | 24             | 24            | 0 0.0        | 378             | 123            | 67.5       |
| 112029  | 29             | 29            | 0 0.0        | 162             | 121            | 25.3       |
| 112030  | 19             | 19            | 0 0.0        | 363             | 74             | 79.6       |
| 112031  | 19             | 19            | 0 0.0        | 374             | 186            | 50.3       |
| 112032  | 36             | 36            | 0 0.0        | 330             | 39             | 88.2       |
| 112033  | 19             | 18            | 1 5.3        | 851             | 76             | 91.1       |
| 112034  | 45             | 45            | 0 0.0        | 177             | 154            | 13.0       |
| 112035  | 19             | 19            | 0 0.0        | 1297            | 1              | 99.9       |
| 112036  | 17             | 17            | 0 0.0        | 412             | 1              | 99.8       |
| 112037  | 41             | 41            | 0 0.0        | 286             | 169            | 40.9       |
| 112038  | 47             | 47            | 0 0.0        | 261             | 251            | 3.8        |
| 112039  | 13             | 13            | 0 0.0        | 1243            | 19             | 98.5       |
| 112040  | 35             | 35            | 0 0.0        | 193             | 83             | 57.0       |
| 112041  | 24             | 24            | 0 0.0        | 518             | 99             | 80.9       |
| 112042  | 21             | 21            | 0 0.0        | 258             | 147            | 43.0       |
| 112043  | 33             | 33            | 0 0.0        | 679             | 1              | 99.9       |
| 112044  | 29             | 29            | 0 0.0        | 327             | 195            | 40.4       |
| 112045  | 27             | 27            | 0 0.0        | 311             | 18             | 94.2       |
| 112046  | 15             | 14            | 1 6.7        | 394             | 47             | 88.1       |
| 112047  | 24             | 24            | 0 0.0        | 814             | 92             | 88.7       |
| 112048  | 24             | 24            | 0 0.0        | 274             | 86             | 68.6       |
| 112049  | 19             | 19            | 0 0.0        | 462             | 34             | 92.6       |
| 112050  | 23             | 21            | 2 8.7        | 1053            | 140            | 86.7       |
| 112051  | 25             | 25            | 0 0.0        | 426             | 82             | 80.8       |
| 112052  | 33             | 33            | 0 0.0        | 1692            | 81             | 95.2       |
| 112053  | 20             | 20            | 0 0.0        | 969             | 158            | 83.7       |
| 112054  | 22             | 22            | 0 0.0        | 268             | 108            | 59.7       |
| 112055  | 21             | 20            | 1 4.8        | 591             | 51             | 91.4       |
| 112056  | 31             | 31            | 0 0.0        | 314             | 135            | 57.0       |
| 112057  | 23             | 21            | 2 8.7        | 1176            | 10             | 99.1       |
| 112058  | 15             | 15            | 0 0.0        | 858             | 1              | 99.9       |
| 112059  | 22             | 22            | 0 0.0        | 530             | 169            | 68.1       |
| 112060  | 21             | 21            | 0 0.0        | 460             | 214            | 53.5       |
| 112061  | 22             | 22            | 0 0.0        | 614             | 1              | 99.8       |
| 112062  | 25             | 25            | 0 0.0        | 1429            | 47             | 96.7       |
| 112063  | 16             | 16            | 0 0.0        | 1142            | 17             | 98.5       |
| 112064  | 24             | 13            | 11 45.8      | 716             | 122            | 83.0       |
| 112065  | 16             | 16            | 0 0.0        | 857             | 33             | 96.1       |
| 112066  | 29             | 28            | 1 3.4        | 160             | 146            | 8.8        |
| 112067  | 45             | 45            | 0 0.0        | 279             | 249            | 10.8       |
| 112068  | 23             | 23            | 0 0.0        | 791             | 4              | 99.5       |
| 112069  | 25             | 23            | 2 8.0        | 1190            | 51             | 95.7       |
| 112070  | 20             | 20            | 0 0.0        | 476             | 29             | 93.9       |
| 112071  | 25             | 25            | 0 0.0        | 133             | 101            | 24.1       |
| 112072  | 26             | 26            | 0 0.0        | 436             | 196            | 55.0       |
| 112073  | 18             | 18            | 0 0.0        | 602             | 79             | 86.9       |
| 112074  | 22             | 22            | 0 0.0        | 767             | 110            | 85.7       |
| 112075  | 22             | 22            | 0 0.0        | 424             | 72             | 83.0       |
| 112076  | 33             | 33            | 0 0.0        | 241             | 147            | 39.0       |
| 112077  | 26             | 26            | 0 0.0        | 407             | 232            | 43.0       |
| 112078  | 17             | 17            | 0 0.0        | 820             | 19             | 97.7       |
| 112079  | 20             | 20            | 0 0.0        | 361             | 70             | 80.6       |
| 112080  | 19             | 19            | 0 0.0        | 616             | 18             | 97.1       |
| 112081  | 33             | 33            | 0 0.0        | 340             | 128            | 62.4       |
| 112082  | 22             | 22            | 0 0.0        | 373             | 95             | 74.5       |
| 112083  | 36             | 36            | 0 0.0        | 408             | 287            | 29.7       |
| 112084  | 32             | 32            | 0 0.0        | 692             | 12             | 98.3       |
| 112085  | 28             | 28            | 0 0.0        | 651             | 136            | 79.1       |
| 112086  | 23             | 23            | 0 0.0        | 534             | 1              | 99.8       |
| 112087  | 28             | 28            | 0 0.0        | 350             | 226            | 35.4       |

| Gene-ID | Orth.<br>#taxa | Red.<br>#taxa | Diff.<br># % |      | Align.<br>#Pos. | Mask.<br>#Pos. | Diff.<br>% |
|---------|----------------|---------------|--------------|------|-----------------|----------------|------------|
| 112088  | 36             | 36            | 0            | 0.0  | 276             | 238            | 13.8       |
| 112089  | 16             | 16            | 0            | 0.0  | 627             | 195            | 68.9       |
| 112090  | 20             | 20            | 0            | 0.0  | 1269            | 1              | 99.9       |
| 112091  | 15             | 15            | 0            | 0.0  | 937             | 7              | 99.3       |
| 112092  | 20             | 18            | 2            | 10.0 | 657             | 38             | 94.2       |
| 112093  | 21             | 21            | 0            | 0.0  | 400             | 113            | 71.8       |
| 112094  | 20             | 19            | 1            | 5.0  | 431             | 197            | 54.3       |
| 112095  | 19             | 19            | 0            | 0.0  | 948             | 1              | 99.9       |
| 112096  | 23             | 23            | 0            | 0.0  | 895             | 5              | 99.4       |
| 112097  | 27             | 27            | 0            | 0.0  | 458             | 52             | 88.6       |
| 112098  | 19             | 19            | 0            | 0.0  | 700             | 1              | 99.9       |
| 112099  | 22             | 22            | 0            | 0.0  | 1369            | 1              | 99.9       |
| 112100  | 25             | 25            | 0            | 0.0  | 444             | 118            | 73.4       |
| 112101  | 26             | 26            | 0            | 0.0  | 770             | 1              | 99.9       |
| 112102  | 42             | 42            | 0            | 0.0  | 261             | 145            | 44.4       |
| 112103  | 23             | 23            | 0            | 0.0  | 233             | 141            | 39.5       |
| 112104  | 23             | 23            | 0            | 0.0  | 662             | 50             | 92.4       |
| 112105  | 31             | 31            | 0            | 0.0  | 371             | 101            | 72.8       |
| 112106  | 35             | 34            | 1            | 2.9  | 172             | 150            | 12.8       |
| 112107  | 38             | 38            | 0            | 0.0  | 189             | 153            | 19.0       |
| 112108  | 38             | 38            | 0            | 0.0  | 381             | 259            | 32.0       |
| 112109  | 23             | 23            | 0            | 0.0  | 562             | 83             | 85.2       |
| 112110  | 29             | 29            | 0            | 0.0  | 401             | 168            | 58.1       |
| 112111  | 27             | 26            | 1            | 3.7  | 785             | 152            | 80.6       |
| 112112  | 24             | 23            | 1            | 4.2  | 572             | 17             | 97.0       |
| 112113  | 31             | 31            | 0            | 0.0  | 292             | 161            | 44.9       |
| 112114  | 19             | 19            | 0            | 0.0  | 905             | 161            | 82.2       |
| 112115  | 48             | 48            | 0            | 0.0  | 184             | 132            | 28.3       |
| 112116  | 21             | 20            | 1            | 4.8  | 319             | 43             | 86.5       |
| 112117  | 22             | 22            | 0            | 0.0  | 358             | 200            | 44.1       |
| 112118  | 26             | 26            | 0            | 0.0  | 381             | 149            | 60.9       |
| 112119  | 21             | 21            | 0            | 0.0  | 646             | 45             | 93.0       |
| 112120  | 23             | 23            | 0            | 0.0  | 953             | 1              | 99.9       |
| 112121  | 27             | 27            | 0            | 0.0  | 575             | 154            | 73.2       |
| 112122  | 29             | 29            | 0            | 0.0  | 450             | 17             | 96.2       |
| 112123  | 39             | 39            | 0            | 0.0  | 111             | 65             | 41.4       |
| 112124  | 32             | 32            | 0            | 0.0  | 649             | 251            | 61.3       |
| 112125  | 28             | 27            | 1            | 3.6  | 459             | 24             | 94.8       |
| 112126  | 31             | 31            | 0            | 0.0  | 171             | 140            | 18.1       |
| 112127  | 33             | 33            | 0            | 0.0  | 599             | 1              | 99.8       |
| 112128  | 15             | 12            | 3            | 20.0 | 426             | 47             | 89.0       |
| 112129  | 34             | 34            | 0            | 0.0  | 203             | 154            | 24.1       |
| 112130  | 36             | 36            | 0            | 0.0  | 201             | 196            | 2.5        |
| 112131  | 27             | 27            | 0            | 0.0  | 305             | 92             | 69.8       |
| 112132  | 14             | 14            | 0            | 0.0  | 2642            | 1              | 100.0      |
| 112133  | 16             | 16            | 0            | 0.0  | 2263            | 7              | 99.7       |
| 112134  | 24             | 24            | 0            | 0.0  | 999             | 1              | 99.9       |
| 112135  | 21             | 21            | 0            | 0.0  | 903             | 196            | 78.3       |
| 112136  | 18             | 18            | 0            | 0.0  | 1135            | 1              | 99.9       |
| 112137  | 28             | 28            | 0            | 0.0  | 96              | 74             | 22.9       |
| 112138  | 32             | 31            | 1            | 3.1  | 843             | 1              | 99.9       |
| 112139  | 43             | 43            | 0            | 0.0  | 765             | 3              | 99.6       |
| 112140  | 31             | 31            | 0            | 0.0  | 859             | 1              | 99.9       |
| 112141  | 35             | 35            | 0            | 0.0  | 156             | 133            | 14.7       |
| 112142  | 36             | 35            | 1            | 2.8  | 549             | 64             | 88.3       |
| 112143  | 21             | 21            | 0            | 0.0  | 793             | 83             | 89.5       |
| 112144  | 33             | 33            | 0            | 0.0  | 360             | 135            | 62.5       |
| 112145  | 34             | 34            | 0            | 0.0  | 354             | 91             | 74.3       |
| 112146  | 13             | 13            | 0            | 0.0  | 1268            | 1              | 99.9       |
| 112147  | 35             | 35            | 0            | 0.0  | 240             | 163            | 32.1       |
| 112148  | 31             | 31            | 0            | 0.0  | 1276            | 1              | 99.9       |
| 112149  | 26             | 26            | 0            | 0.0  | 181             | 109            | 39.8       |
| 112150  | 19             | 19            | 0            | 0.0  | 386             | 90             | 76.7       |
| 112151  | 25             | 25            | 0            | 0.0  | 287             | 119            | 58.5       |
| 112152  | 21             | 21            | 0            | 0.0  | 644             | 60             | 90.7       |
| 112153  | 24             | 19            | 5            | 20.8 | 2034            | 1              | 100.0      |
| 112154  | 19             | 19            | 0            | 0.0  | 274             | 141            | 48.5       |
| 112155  | 17             | 17            | 0            | 0.0  | 1937            | 26             | 98.7       |
| 112156  | 33             | 33            | 0            | 0.0  | 226             | 207            | 8.4        |
| 112157  | 26             | 26            | 0            | 0.0  | 376             | 53             | 85.9       |
| 112158  | 28             | 28            | 0            | 0.0  | 313             | 228            | 27.2       |
| 112159  | 30             | 29            | 1            | 3.3  | 126             | 118            | 6.3        |
| 112160  | 33             | 33            | 0            | 0.0  | 130             | 112            | 13.8       |
| 112161  | 25             | 25            | 0            | 0.0  | 432             | 180            | 58.3       |
| 112162  | 28             | 28            | 0            | 0.0  | 708             | 27             | 96.2       |

| Gene-ID | Orth.<br>#taxa | Red.<br>#taxa | Diff.<br># % |      | Align.<br>#Pos. | Mask.<br>#Pos. | Diff.<br>% |
|---------|----------------|---------------|--------------|------|-----------------|----------------|------------|
| 112163  | 29             | 29            | 0            | 0.0  | 237             | 160            | 32.5       |
| 112164  | 36             | 36            | 0            | 0.0  | 211             | 176            | 16.6       |
| 112165  | 14             | 14            | 0            | 0.0  | 266             | 98             | 63.2       |
| 112166  | 22             | 22            | 0            | 0.0  | 545             | 26             | 95.2       |
| 112167  | 21             | 21            | 0            | 0.0  | 337             | 225            | 33.2       |
| 112168  | 32             | 32            | 0            | 0.0  | 498             | 258            | 48.2       |
| 112169  | 35             | 35            | 0            | 0.0  | 321             | 171            | 46.7       |
| 112170  | 25             | 25            | 0            | 0.0  | 462             | 88             | 81.0       |
| 112171  | 20             | 20            | 0            | 0.0  | 951             | 1              | 99.9       |
| 112172  | 16             | 16            | 0            | 0.0  | 769             | 1              | 99.9       |
| 112173  | 31             | 30            | 1            | 3.2  | 534             | 82             | 84.6       |
| 112174  | 28             | 28            | 0            | 0.0  | 879             | 104            | 88.2       |
| 112175  | 33             | 33            | 0            | 0.0  | 518             | 1              | 99.8       |
| 112176  | 33             | 32            | 1            | 3.0  | 270             | 141            | 47.8       |
| 112177  | 15             | 15            | 0            | 0.0  | 817             | 1              | 99.9       |
| 112178  | 37             | 37            | 0            | 0.0  | 103             | 51             | 50.5       |
| 112179  | 20             | 20            | 0            | 0.0  | 877             | 33             | 96.2       |
| 112180  | 21             | 20            | 1            | 4.8  | 232             | 107            | 53.9       |
| 112181  | 42             | 42            | 0            | 0.0  | 215             | 194            | 9.8        |
| 112182  | 30             | 30            | 0            | 0.0  | 211             | 137            | 35.1       |
| 112183  | 33             | 33            | 0            | 0.0  | 808             | 71             | 91.2       |
| 112184  | 26             | 26            | 0            | 0.0  | 105             | 82             | 21.9       |
| 112185  | 19             | 19            | 0            | 0.0  | 580             | 12             | 97.9       |
| 112186  | 35             | 35            | 0            | 0.0  | 107             | 100            | 6.5        |
| 112187  | 38             | 38            | 0            | 0.0  | 373             | 66             | 82.3       |
| 112188  | 19             | 19            | 0            | 0.0  | 500             | 44             | 91.2       |
| 112189  | 22             | 22            | 0            | 0.0  | 586             | 6              | 99.0       |
| 112190  | 21             | 21            | 0            | 0.0  | 412             | 50             | 87.9       |
| 112191  | 27             | 27            | 0            | 0.0  | 308             | 58             | 81.2       |
| 112192  | 21             | 21            | 0            | 0.0  | 551             | 1              | 99.8       |
| 112193  | 14             | 14            | 0            | 0.0  | 1779            | 1              | 99.9       |
| 112194  | 15             | 15            | 0            | 0.0  | 675             | 8              | 98.8       |
| 112195  | 44             | 44            | 0            | 0.0  | 234             | 215            | 8.1        |
| 112196  | 15             | 15            | 0            | 0.0  | 905             | 102            | 88.7       |
| 112197  | 24             | 24            | 0            | 0.0  | 396             | 108            | 72.7       |
| 112198  | 26             | 26            | 0            | 0.0  | 292             | 191            | 34.6       |
| 112199  | 35             | 34            | 1            | 2.9  | 566             | 60             | 89.4       |
| 112200  | 26             | 26            | 0            | 0.0  | 1094            | 15             | 98.6       |
| 112201  | 22             | 22            | 0            | 0.0  | 162             | 142            | 12.3       |
| 112202  | 43             | 43            | 0            | 0.0  | 157             | 112            | 28.7       |
| 112203  | 33             | 33            | 0            | 0.0  | 451             | 154            | 65.9       |
| 112204  | 42             | 42            | 0            | 0.0  | 309             | 236            | 23.6       |
| 112205  | 19             | 19            | 0            | 0.0  | 865             | 21             | 97.6       |
| 112206  | 37             | 37            | 0            | 0.0  | 229             | 151            | 34.1       |
| 112207  | 28             | 28            | 0            | 0.0  | 481             | 242            | 49.7       |
| 112208  | 25             | 25            | 0            | 0.0  | 584             | 160            | 72.6       |
| 112209  | 18             | 18            | 0            | 0.0  | 506             | 62             | 87.7       |
| 112210  | 22             | 22            | 0            | 0.0  | 335             | 123            | 63.3       |
| 112211  | 25             | 25            | 0            | 0.0  | 673             | 93             | 86.2       |
| 112212  | 31             | 31            | 0            | 0.0  | 450             | 83             | 81.6       |
| 112213  | 29             | 29            | 0            | 0.0  | 1022            | 48             | 95.3       |
| 112214  | 32             | 22            | 10           | 31.3 | 307             | 236            | 23.1       |
| 112215  | 34             | 33            | 1            | 2.9  | 587             | 1              | 99.8       |
| 112216  | 22             | 21            | 1            | 4.5  | 599             | 45             | 92.5       |
| 112217  | 27             | 27            | 0            | 0.0  | 544             | 1              | 99.8       |
| 112218  | 25             | 25            | 0            | 0.0  | 1123            | 1              | 99.9       |
| 112219  | 25             | 24            | 1            | 4.0  | 1216            | 83             | 93.2       |
| 112220  | 24             | 24            | 0            | 0.0  | 781             | 1              | 99.9       |
| 112221  | 23             | 22            | 1            | 4.3  | 508             | 176            | 65.4       |
| 112222  | 23             | 23            | 0            | 0.0  | 680             | 157            | 76.9       |
| 112223  | 44             | 44            | 0            | 0.0  | 205             | 205            | 0.0        |
| 112224  | 26             | 26            | 0            | 0.0  | 291             | 121            | 58.4       |
| 112225  | 23             | 23            | 0            | 0.0  | 1738            | 1              | 99.9       |
| 112226  | 27             | 27            | 0            | 0.0  | 215             | 174            | 19.1       |
| 112227  | 23             | 23            | 0            | 0.0  | 640             | 172            | 73.1       |
| 112228  | 18             | 18            | 0            | 0.0  | 828             | 34             | 95.9       |
| 112229  | 40             | 31            | 9            | 22.5 | 863             | 1              | 99.9       |
| 112230  | 20             | 20            | 0            | 0.0  | 694             | 1              | 99.9       |
| 112231  | 25             | 25            | 0            | 0.0  | 445             | 32             | 92.8       |
| 112232  | 15             | 15            | 0            | 0.0  | 385             | 57             | 85.2       |
| 112233  | 26             | 26            | 0            | 0.0  | 247             | 115            | 53.4       |
| 112234  | 31             | 30            | 1            | 3.2  | 560             | 43             | 92.3       |
| 112235  | 29             | 28            | 1            | 3.4  | 347             | 192            | 44.7       |
| 112236  | 28             | 28            | 0            | 0.0  | 819             | 199            | 75.7       |
| 112237  | 27             | 27            | 0            | 0.0  | 931             | 14             | 98.5       |

| Gene-ID | Orth.<br>#taxa | Red.<br>#taxa | Diff.<br># % | Align.<br>#Pos. | Mask.<br>#Pos. | Diff.<br>% |
|---------|----------------|---------------|--------------|-----------------|----------------|------------|
| 112238  | 26             | 26            | 0 0.0        | 691             | 1              | 99.9       |
| 112239  | 24             | 24            | 0 0.0        | 180             | 127            | 29.4       |
| 112240  | 22             | 22            | 0 0.0        | 268             | 127            | 52.6       |
| 112241  | 16             | 15            | 1 6.3        | 854             | 70             | 91.8       |
| 112242  | 43             | 43            | 0 0.0        | 199             | 180            | 9.5        |
| 112243  | 20             | 20            | 0 0.0        | 719             | 130            | 81.9       |
| 112244  | 21             | 21            | 0 0.0        | 665             | 8              | 98.8       |
| 112245  | 29             | 29            | 0 0.0        | 471             | 182            | 61.4       |
| 112246  | 35             | 34            | 1 2.9        | 649             | 1              | 99.8       |
| 112247  | 35             | 35            | 0 0.0        | 364             | 231            | 36.5       |
| 112248  | 25             | 25            | 0 0.0        | 1082            | 5              | 99.5       |
| 112249  | 25             | 25            | 0 0.0        | 2289            | 1              | 100.0      |
| 112250  | 17             | 17            | 0 0.0        | 833             | 1              | 99.9       |
| 112251  | 23             | 23            | 0 0.0        | 267             | 157            | 41.2       |
| 112252  | 32             | 26            | 6 18.8       | 646             | 115            | 82.2       |
| 112253  | 28             | 28            | 0 0.0        | 671             | 6              | 99.1       |
| 112254  | 41             | 40            | 1 2.4        | 181             | 150            | 17.1       |
| 112255  | 35             | 34            | 1 2.9        | 551             | 98             | 82.2       |
| 112256  | 33             | 33            | 0 0.0        | 292             | 228            | 21.9       |
| 112257  | 29             | 29            | 0 0.0        | 1265            | 1              | 99.9       |
| 112258  | 30             | 30            | 0 0.0        | 1879            | 1              | 99.9       |
| 112259  | 27             | 24            | 3 11.1       | 184             | 165            | 10.3       |
| 112260  | 21             | 21            | 0 0.0        | 571             | 49             | 91.4       |
| 112261  | 28             | 22            | 6 21.4       | 650             | 25             | 96.2       |
| 112262  | 34             | 34            | 0 0.0        | 346             | 109            | 68.5       |
| 112263  | 26             | 26            | 0 0.0        | 394             | 78             | 80.2       |
| 112264  | 19             | 19            | 0 0.0        | 1985            | 1              | 99.9       |
| 112265  | 20             | 20            | 0 0.0        | 1613            | 1              | 99.9       |
| 112266  | 14             | 14            | 0 0.0        | 2291            | 1              | 100.0      |
| 112267  | 18             | 18            | 0 0.0        | 782             | 1              | 99.9       |
| 112268  | 27             | 27            | 0 0.0        | 468             | 116            | 75.2       |
| 112269  | 22             | 20            | 2 9.1        | 647             | 63             | 90.3       |
| 112270  | 21             | 21            | 0 0.0        | 195             | 125            | 35.9       |
| 112271  | 28             | 28            | 0 0.0        | 287             | 242            | 15.7       |
| 112272  | 25             | 25            | 0 0.0        | 657             | 43             | 93.5       |
| 112273  | 22             | 22            | 0 0.0        | 365             | 26             | 92.9       |
| 112274  | 21             | 21            | 0 0.0        | 385             | 74             | 80.8       |
| 112275  | 22             | 22            | 0 0.0        | 772             | 103            | 86.7       |
| 112276  | 30             | 30            | 0 0.0        | 455             | 101            | 77.8       |
| 112277  | 17             | 17            | 0 0.0        | 158             | 85             | 46.2       |
| 112278  | 26             | 26            | 0 0.0        | 425             | 64             | 84.9       |
| 112279  | 29             | 29            | 0 0.0        | 446             | 70             | 84.3       |
| 112280  | 38             | 38            | 0 0.0        | 235             | 162            | 31.1       |
| 112281  | 35             | 24            | 11 31.4      | 238             | 182            | 23.5       |
| 112282  | 21             | 21            | 0 0.0        | 689             | 61             | 91.1       |
| 112283  | 18             | 17            | 1 5.6        | 282             | 104            | 63.1       |
| 112284  | 41             | 39            | 2 4.9        | 525             | 81             | 84.6       |
| 112285  | 38             | 33            | 5 13.2       | 461             | 1              | 99.8       |
| 112286  | 41             | 41            | 0 0.0        | 364             | 166            | 54.4       |
| 112287  | 24             | 24            | 0 0.0        | 359             | 56             | 84.4       |
| 112288  | 25             | 25            | 0 0.0        | 2467            | 41             | 98.3       |
| 112289  | 22             | 22            | 0 0.0        | 887             | 1              | 99.9       |
| 112290  | 33             | 33            | 0 0.0        | 700             | 60             | 91.4       |
| 112291  | 33             | 33            | 0 0.0        | 234             | 178            | 23.9       |
| 112292  | 29             | 29            | 0 0.0        | 126             | 84             | 33.3       |
| 112293  | 25             | 25            | 0 0.0        | 387             | 147            | 62.0       |
| 112294  | 23             | 23            | 0 0.0        | 1317            | 1              | 99.9       |
| 112295  | 28             | 28            | 0 0.0        | 699             | 12             | 98.3       |
| 112296  | 23             | 23            | 0 0.0        | 613             | 152            | 75.2       |
| 112297  | 45             | 45            | 0 0.0        | 346             | 206            | 40.5       |
| 112298  | 38             | 38            | 0 0.0        | 214             | 151            | 29.4       |
| 112299  | 22             | 22            | 0 0.0        | 397             | 180            | 54.7       |
| 112300  | 34             | 34            | 0 0.0        | 423             | 132            | 68.8       |
| 112301  | 40             | 40            | 0 0.0        | 107             | 107            | 0.0        |
| 112302  | 24             | 24            | 0 0.0        | 365             | 91             | 75.1       |
| 112303  | 18             | 18            | 0 0.0        | 671             | 1              | 99.9       |
| 112304  | 23             | 23            | 0 0.0        | 1548            | 1              | 99.9       |
| 112305  | 17             | 17            | 0 0.0        | 316             | 56             | 82.3       |
| 112306  | 18             | 18            | 0 0.0        | 504             | 71             | 85.9       |
| 112307  | 24             | 24            | 0 0.0        | 117             | 103            | 12.0       |
| 112308  | 23             | 23            | 0 0.0        | 208             | 72             | 65.4       |
| 112309  | 24             | 24            | 0 0.0        | 499             | 30             | 94.0       |
| 112310  | 35             | 33            | 2 5.7        | 243             | 117            | 51.9       |
| 112311  | 31             | 31            | 0 0.0        | 153             | 109            | 28.8       |
| 112312  | 29             | 29            | 0 0.0        | 325             | 180            | 44.6       |

| Gene-ID | Orth.<br>#taxa | Red.<br>#taxa | Diff.<br># % | Align.<br>#Pos. | Mask.<br>#Pos. | Diff.<br>% |
|---------|----------------|---------------|--------------|-----------------|----------------|------------|
| 112313  | 29             | 29            | 0 0.0        | 408             | 28             | 93.1       |
| 112314  | 18             | 18            | 0 0.0        | 846             | 1              | 99.9       |
| 112315  | 35             | 35            | 0 0.0        | 496             | 217            | 56.3       |
| 112316  | 26             | 26            | 0 0.0        | 713             | 138            | 80.6       |
| 112317  | 21             | 21            | 0 0.0        | 733             | 1              | 99.9       |
| 112318  | 30             | 30            | 0 0.0        | 1744            | 8              | 99.5       |
| 112319  | 27             | 27            | 0 0.0        | 187             | 143            | 23.5       |
| 112320  | 28             | 28            | 0 0.0        | 580             | 10             | 98.3       |
| 112321  | 34             | 34            | 0 0.0        | 479             | 40             | 91.6       |
| 112322  | 53             | 53            | 0 0.0        | 126             | 104            | 17.5       |
| 112323  | 31             | 29            | 2 6.5        | 708             | 25             | 96.5       |
| 112324  | 31             | 31            | 0 0.0        | 246             | 175            | 28.9       |
| 112325  | 18             | 18            | 0 0.0        | 1444            | 5              | 99.7       |
| 112326  | 26             | 26            | 0 0.0        | 304             | 100            | 67.1       |
| 112327  | 31             | 31            | 0 0.0        | 221             | 117            | 47.1       |
| 112328  | 23             | 23            | 0 0.0        | 573             | 86             | 85.0       |
| 112329  | 33             | 33            | 0 0.0        | 512             | 124            | 75.8       |
| 112330  | 22             | 22            | 0 0.0        | 468             | 48             | 89.7       |
| 112331  | 33             | 33            | 0 0.0        | 569             | 95             | 83.3       |
| 112332  | 28             | 28            | 0 0.0        | 572             | 215            | 62.4       |
| 112333  | 26             | 22            | 4 15.4       | 539             | 66             | 87.8       |
| 112334  | 30             | 30            | 0 0.0        | 322             | 99             | 69.3       |
| 112335  | 27             | 27            | 0 0.0        | 385             | 139            | 63.9       |
| 112336  | 26             | 26            | 0 0.0        | 513             | 1              | 99.8       |
| 112337  | 29             | 28            | 1 3.4        | 653             | 1              | 99.8       |
| 112338  | 39             | 38            | 1 2.6        | 398             | 1              | 99.7       |
| 112339  | 39             | 39            | 0 0.0        | 343             | 275            | 19.8       |
| 112340  | 20             | 20            | 0 0.0        | 506             | 43             | 91.5       |
| 112341  | 26             | 24            | 2 7.7        | 635             | 62             | 90.2       |
| 112342  | 26             | 26            | 0 0.0        | 110             | 95             | 13.6       |
| 112343  | 17             | 17            | 0 0.0        | 922             | 1              | 99.9       |
| 112344  | 23             | 23            | 0 0.0        | 504             | 22             | 95.6       |
| 112345  | 41             | 41            | 0 0.0        | 450             | 163            | 63.8       |
| 112346  | 23             | 23            | 0 0.0        | 1151            | 26             | 97.7       |
| 112347  | 25             | 25            | 0 0.0        | 1238            | 1              | 99.9       |
| 112348  | 32             | 32            | 0 0.0        | 1252            | 1              | 99.9       |
| 112349  | 37             | 37            | 0 0.0        | 375             | 116            | 69.1       |
| 112350  | 39             | 39            | 0 0.0        | 90              | 74             | 17.8       |
| 112351  | 18             | 18            | 0 0.0        | 691             | 38             | 94.5       |
| 112352  | 33             | 25            | 8 24.2       | 1006            | 171            | 83.0       |
| 112353  | 29             | 22            | 7 24.1       | 683             | 70             | 89.8       |
| 112354  | 45             | 45            | 0 0.0        | 143             | 95             | 33.6       |
| 112355  | 40             | 40            | 0 0.0        | 218             | 191            | 12.4       |
| 112356  | 25             | 25            | 0 0.0        | 771             | 1              | 99.9       |
| 112357  | 16             | 16            | 0 0.0        | 578             | 1              | 99.8       |
| 112358  | 45             | 45            | 0 0.0        | 125             | 106            | 15.2       |
| 112359  | 45             | 45            | 0 0.0        | 235             | 213            | 9.4        |
| 112360  | 25             | 25            | 0 0.0        | 150             | 94             | 37.3       |
| 112361  | 24             | 23            | 1 4.2        | 375             | 150            | 60.0       |
| 112362  | 16             | 16            | 0 0.0        | 871             | 10             | 98.9       |
| 112363  | 34             | 34            | 0 0.0        | 641             | 10             | 98.4       |
| 112364  | 29             | 29            | 0 0.0        | 133             | 93             | 30.1       |
| 112365  | 22             | 22            | 0 0.0        | 329             | 285            | 13.4       |
| 112366  | 40             | 40            | 0 0.0        | 475             | 385            | 18.9       |
| 112367  | 34             | 34            | 0 0.0        | 249             | 158            | 36.5       |
| 112368  | 21             | 21            | 0 0.0        | 858             | 1              | 99.9       |
| 112369  | 31             | 31            | 0 0.0        | 287             | 100            | 65.2       |
| 112370  | 27             | 27            | 0 0.0        | 446             | 44             | 90.1       |
| 112371  | 35             | 33            | 2 5.7        | 674             | 1              | 99.9       |
| 112372  | 28             | 28            | 0 0.0        | 750             | 1              | 99.9       |
| 112373  | 17             | 17            | 0 0.0        | 995             | 14             | 98.6       |
| 112374  | 27             | 24            | 3 11.1       | 292             | 117            | 59.9       |
| 112375  | 24             | 24            | 0 0.0        | 307             | 190            | 38.1       |
| 112376  | 28             | 28            | 0 0.0        | 97              | 86             | 11.3       |
| 112377  | 22             | 22            | 0 0.0        | 2115            | 1              | 100.0      |
| 112378  | 22             | 22            | 0 0.0        | 642             | 33             | 94.9       |
| 112379  | 27             | 27            | 0 0.0        | 267             | 208            | 22.1       |
| 112380  | 39             | 39            | 0 0.0        | 170             | 93             | 45.3       |
| 112381  | 37             | 37            | 0 0.0        | 428             | 172            | 59.8       |
| 112382  | 31             | 31            | 0 0.0        | 434             | 224            | 48.4       |
| 112383  | 26             | 26            | 0 0.0        | 220             | 159            | 27.7       |
| 112384  | 17             | 17            | 0 0.0        | 4174            | 1              | 100.0      |
| 112385  | 23             | 23            | 0 0.0        | 541             | 1              | 99.8       |
| 112386  | 28             | 28            | 0 0.0        | 244             | 159            | 34.8       |
| 112387  | 19             | 19            | 0 0.0        | 576             | 1              | 99.8       |

| Gene-ID | Orth.<br>#taxa | Red.<br>#taxa | Diff.<br># % |      | Align.<br>#Pos. | Mask.<br>#Pos. | Diff.<br>% |
|---------|----------------|---------------|--------------|------|-----------------|----------------|------------|
| 112388  | 21             | 21            | 0            | 0.0  | 211             | 131            | 37.9       |
| 112389  | 32             | 30            | 2            | 6.3  | 540             | 112            | 79.3       |
| 112390  | 30             | 30            | 0            | 0.0  | 746             | 73             | 90.2       |
| 112391  | 35             | 35            | 0            | 0.0  | 392             | 278            | 29.1       |
| 112392  | 32             | 32            | 0            | 0.0  | 208             | 177            | 14.9       |
| 112393  | 23             | 23            | 0            | 0.0  | 456             | 1              | 99.8       |
| 112394  | 41             | 41            | 0            | 0.0  | 143             | 87             | 39.2       |
| 112395  | 34             | 33            | 1            | 2.9  | 742             | 53             | 92.9       |
| 112396  | 20             | 20            | 0            | 0.0  | 1132            | 84             | 92.6       |
| 112397  | 20             | 20            | 0            | 0.0  | 1403            | 1              | 99.9       |
| 112398  | 36             | 36            | 0            | 0.0  | 542             | 100            | 81.5       |
| 112399  | 31             | 31            | 0            | 0.0  | 374             | 331            | 11.5       |
| 112400  | 16             | 16            | 0            | 0.0  | 1149            | 1              | 99.9       |
| 112401  | 30             | 30            | 0            | 0.0  | 796             | 1              | 99.9       |
| 112402  | 26             | 26            | 0            | 0.0  | 207             | 104            | 49.8       |
| 112403  | 25             | 25            | 0            | 0.0  | 233             | 90             | 61.4       |
| 112404  | 25             | 25            | 0            | 0.0  | 931             | 7              | 99.2       |
| 112405  | 24             | 24            | 0            | 0.0  | 305             | 181            | 40.7       |
| 112406  | 27             | 27            | 0            | 0.0  | 173             | 114            | 34.1       |
| 112407  | 46             | 46            | 0            | 0.0  | 236             | 129            | 45.3       |
| 112408  | 21             | 21            | 0            | 0.0  | 295             | 96             | 67.5       |
| 112409  | 26             | 26            | 0            | 0.0  | 573             | 1              | 99.8       |
| 112410  | 21             | 20            | 1            | 4.8  | 952             | 40             | 95.8       |
| 112411  | 17             | 17            | 0            | 0.0  | 464             | 18             | 96.1       |
| 112412  | 16             | 16            | 0            | 0.0  | 266             | 105            | 60.5       |
| 112413  | 30             | 30            | 0            | 0.0  | 744             | 68             | 90.9       |
| 112414  | 41             | 41            | 0            | 0.0  | 151             | 112            | 25.8       |
| 112415  | 30             | 30            | 0            | 0.0  | 486             | 153            | 68.5       |
| 112416  | 35             | 35            | 0            | 0.0  | 481             | 206            | 57.2       |
| 112417  | 36             | 36            | 0            | 0.0  | 149             | 135            | 9.4        |
| 112418  | 32             | 32            | 0            | 0.0  | 562             | 1              | 99.8       |
| 112419  | 23             | 23            | 0            | 0.0  | 2318            | 1              | 100.0      |
| 112420  | 28             | 27            | 1            | 3.6  | 680             | 147            | 78.4       |
| 112421  | 25             | 25            | 0            | 0.0  | 159             | 90             | 43.4       |
| 112422  | 29             | 29            | 0            | 0.0  | 269             | 143            | 46.8       |
| 112423  | 30             | 26            | 4            | 13.3 | 1115            | 1              | 99.9       |
| 112424  | 23             | 23            | 0            | 0.0  | 463             | 33             | 92.9       |
| 112425  | 46             | 46            | 0            | 0.0  | 147             | 139            | 5.4        |
| 112426  | 26             | 26            | 0            | 0.0  | 919             | 2              | 99.8       |
| 112427  | 30             | 29            | 1            | 3.3  | 190             | 116            | 38.9       |
| 112428  | 23             | 23            | 0            | 0.0  | 555             | 1              | 99.8       |
| 112429  | 29             | 29            | 0            | 0.0  | 616             | 28             | 95.5       |
| 112430  | 20             | 20            | 0            | 0.0  | 659             | 17             | 97.4       |
| 112431  | 23             | 23            | 0            | 0.0  | 324             | 1              | 99.7       |
| 112432  | 31             | 31            | 0            | 0.0  | 191             | 135            | 29.3       |
| 112433  | 36             | 35            | 1            | 2.8  | 171             | 155            | 9.4        |
| 112434  | 30             | 30            | 0            | 0.0  | 1240            | 94             | 92.4       |
| 112435  | 20             | 20            | 0            | 0.0  | 967             | 1              | 99.9       |
| 112436  | 47             | 47            | 0            | 0.0  | 209             | 179            | 14.4       |
| 112437  | 35             | 35            | 0            | 0.0  | 576             | 116            | 79.9       |
| 112438  | 35             | 34            | 1            | 2.9  | 422             | 181            | 57.1       |
| 112439  | 32             | 32            | 0            | 0.0  | 1114            | 37             | 96.7       |
| 112440  | 22             | 22            | 0            | 0.0  | 719             | 1              | 99.9       |
| 112441  | 27             | 27            | 0            | 0.0  | 439             | 12             | 97.3       |
| 112442  | 20             | 19            | 1            | 5.0  | 1205            | 1              | 99.9       |
| 112443  | 32             | 32            | 0            | 0.0  | 422             | 367            | 13.0       |
| 112444  | 14             | 14            | 0            | 0.0  | 620             | 37             | 94.0       |
| 112445  | 36             | 35            | 1            | 2.8  | 162             | 113            | 30.2       |
| 112446  | 43             | 43            | 0            | 0.0  | 175             | 139            | 20.6       |
| 112447  | 20             | 20            | 0            | 0.0  | 250             | 126            | 49.6       |
| 112448  | 42             | 42            | 0            | 0.0  | 123             | 108            | 12.2       |
| 112449  | 30             | 30            | 0            | 0.0  | 263             | 173            | 34.2       |
| 112450  | 29             | 29            | 0            | 0.0  | 380             | 115            | 69.7       |
| 112451  | 41             | 41            | 0            | 0.0  | 90              | 83             | 7.8        |
| 112452  | 23             | 23            | 0            | 0.0  | 363             | 120            | 66.9       |
| 112453  | 26             | 26            | 0            | 0.0  | 317             | 121            | 61.8       |
| 112454  | 23             | 23            | 0            | 0.0  | 537             | 19             | 96.5       |

|                             | Orth. | Red. |
|-----------------------------|-------|------|
| mean #taxa/gene             | 26.7  | 26.4 |
| gene coverage               | 41.1  | 40.6 |
| excluded #taxa/gene         |       | 0.3  |
| % of excluded sequences     |       | 1.3  |
| Mask.                       |       |      |
| mean %masked positions/gene | 69.9  |      |
| % of all masked positions   | 85.1  |      |

**Table S4.** Summary of the results of the paralogy screening with respect to clades detected at the different steps and genes affected.

|                                   | Clades with<br>BS $\geq$ 95 | # genes |
|-----------------------------------|-----------------------------|---------|
| Before filtering                  | 2220                        | 551     |
| After filtering:                  |                             |         |
| Genus level                       | 1632                        | 518     |
| Conflict                          | 70                          | 51      |
| Subgroup level                    | 373                         | 271     |
| Conflict                          | 166                         | 125     |
| Group level                       | 121                         | 99      |
| Conflict                          | 120                         | 98      |
| Combination of<br>conflict cases: | 144                         | 144     |

**Table S5 continued.**

|                                | NP  | P   | Diff. | NP  | P   | Diff. |
|--------------------------------|-----|-----|-------|-----|-----|-------|
| <i>Seison sp</i>               | 246 | 238 | 8     | 248 | 240 | 8     |
| <i>Spirometra erinacei</i>     | 105 | 104 | 1     | 108 | 107 | 1     |
| <i>Stylochoplana maculata</i>  | 386 | 379 | 7     | 400 | 392 | 8     |
| <i>Symbion pandora</i>         | 143 | 137 | 6     | 143 | 137 | 6     |
| <i>Taenia solium</i>           | 319 | 312 | 7     | 325 | 318 | 7     |
| <i>Terebratalia transversa</i> | 187 | 178 | 9     | 188 | 179 | 9     |
| <i>Tubifex tubifex</i>         | 301 | 292 | 9     | 307 | 298 | 9     |
| <i>Tubulanus polymorphus</i>   | 279 | 275 | 4     | 288 | 284 | 4     |
| <i>Tubulipora sp</i>           | 112 | 108 | 4     | 112 | 108 | 4     |
| <i>Turbanella ambronensis</i>  | 68  | 66  | 2     | na  | na  | na    |

**Table S5.** Pruned (P) sequences for the taxa of datasets d01. NP = not pruned, Diff. = difference.

|                                         | NP  | P   | Diff. |
|-----------------------------------------|-----|-----|-------|
| <i>Adineta vaga</i>                     | 308 | 297 | 11    |
| <i>Alcyonidium diaphanum</i>            | 120 | 116 | 4     |
| <i>Alvinella pompejana</i>              | 446 | 440 | 6     |
| <i>Apis mellifera</i>                   | 555 | 553 | 2     |
| <i>Aplysia californica</i>              | 440 | 428 | 12    |
| <i>Biomphalaria glabrata</i>            | 274 | 256 | 18    |
| <i>Brachionus manjavacas</i>            | 318 | 310 | 8     |
| <i>Brachionus plicatilis</i>            | 485 | 477 | 8     |
| <i>Bugula neritina</i>                  | 280 | 268 | 12    |
| <i>Capitella teleta</i>                 | 476 | 476 | 0     |
| <i>Cephalothrix linearis</i>            | 257 | 253 | 4     |
| <i>Chaetopleura apiculata</i>           | 225 | 216 | 9     |
| <i>Clonorchis sinensis</i>              | 151 | 143 | 8     |
| <i>Crassostrea gigas</i>                | 402 | 387 | 15    |
| <i>Cristatella mucedo</i>               | 140 | 139 | 1     |
| <i>Dactylopodola baltica</i>            | 346 | 338 | 8     |
| <i>Daphnia pulex</i>                    | 485 | 480 | 5     |
| <i>Dugesia japonica</i>                 | 226 | 219 | 7     |
| <i>Dugesia ryukyuensis</i>              | 262 | 252 | 10    |
| <i>Echinococcus granulosus</i>          | 237 | 233 | 4     |
| <i>Echinococcus multilocularis</i>      | 104 | 102 | 2     |
| <i>Echinoderes horni</i>                | 142 | 139 | 3     |
| <i>Echinorhynchus truttae</i>           | 88  | 84  | 4     |
| <i>Euprymna scolopes</i>                | 373 | 360 | 13    |
| <i>Fasciola gigantica</i>               | 108 | 106 | 2     |
| <i>Flustra foliacea</i>                 | 119 | 119 | 0     |
| <i>Gnathostomula paradoxa</i>           | 308 | 296 | 12    |
| <i>Gnathostomula peregrina</i>          | 136 | 131 | 5     |
| <i>Helobdella robusta</i>               | 505 | 504 | 1     |
| <i>Idiosepius paradoxus</i>             | 154 | 145 | 9     |
| <i>Lecane inermis</i>                   | 209 | 206 | 3     |
| <i>Lepidodermella squamata</i>          | 294 | 285 | 9     |
| <i>Lingula anatina</i>                  | 186 | 172 | 14    |
| <i>Lottia gigantea</i>                  | 508 | 505 | 3     |
| <i>Lumbricus rubellus</i>               | 209 | 203 | 6     |
| <i>Macracanthorhynchus hirudinaceus</i> | 336 | 334 | 2     |
| <i>Macrodasys sp</i>                    | 263 | 262 | 1     |
| <i>Macrostomum lignano</i>              | 194 | 185 | 9     |
| <i>Megadasys sp</i>                     | 349 | 341 | 8     |
| <i>Moniezia expansa</i>                 | 421 | 413 | 8     |
| <i>Mytilus californianus</i>            | 250 | 238 | 12    |
| <i>Nematoplanea coelogyneporoides</i>   | 58  | 58  | 0     |
| <i>Neomenia megatrapezata</i>           | 423 | 412 | 11    |
| <i>Opisthorchis viverrini</i>           | 138 | 131 | 7     |
| <i>Paraplanocera sp</i>                 | 148 | 140 | 8     |
| <i>Paratenuisentis ambiguus</i>         | 318 | 313 | 5     |
| <i>Pedicellina cernua</i>               | 112 | 109 | 3     |
| <i>Pedicellina sp</i>                   | 103 | 99  | 4     |
| <i>Philodina roseola</i>                | 173 | 165 | 8     |
| <i>Pomphorhynchus laevis</i>            | 337 | 328 | 9     |
| <i>Priapulus caudatus</i>               | 99  | 96  | 3     |
| <i>Rotaria rotatoria</i>                | 232 | 226 | 6     |
| <i>Schistosoma japonicum</i>            | 459 | 457 | 2     |
| <i>Schistosoma mansoni</i>              | 433 | 423 | 10    |
| <i>Schmidtea mediterranea</i>           | 461 | 456 | 5     |

**Table S6.** Results of the contamination screening using 18S rRNA sequences and taxa, which have been used (see footnotes), to generate the negative and positive sequence reference database for the blast searches of the 559 gene datasets in our study.

| Affected species                     | e-value of 18S-BLAST | Species found in back blast                     | e-value of back blast | Negative                                      | Positive                |
|--------------------------------------|----------------------|-------------------------------------------------|-----------------------|-----------------------------------------------|-------------------------|
| <i>Alvinella pompejana</i>           | 2*e <sup>-54</sup>   | <i>Tripyrella</i> sp. (Nematoda)                | 2*e <sup>-51</sup>    | 1, 2, 3, 4                                    | 5, 6, 7, 8              |
|                                      | 7*e <sup>-40</sup>   | <i>Ptinus fur</i> (Arthropoda)                  | 3*e <sup>-37</sup>    |                                               |                         |
|                                      | 4*e <sup>-27</sup>   | Uncultured Acaulospora (Fungi)                  | 1*e <sup>-25</sup>    |                                               |                         |
| <i>Aplysia californica</i>           | 6*e <sup>-47</sup>   | <i>Litus cynipseus</i> (Arthropoda)             | 9*e <sup>-48</sup>    | 1, 2                                          | 5, 6, 7                 |
| <i>Biomphalaria glabrata</i>         | 7*e <sup>-81</sup>   | <i>Anurofeca richardsi</i> (Ichthyospora)       | 0.0                   | 9, 10                                         | 5, 6, 7                 |
|                                      | 9*e <sup>-55</sup>   | <i>Adineta vaga</i> (Syndermata)                | 0.0                   |                                               |                         |
| <i>Capitella teleta</i>              | 1*e <sup>-58</sup>   | <i>Schlegelia violacea</i> (Magnoliophyta)      | 2*e <sup>-92</sup>    | 11                                            | 1, 2, 6, 7, 8           |
| <i>Crassostrea gigas</i>             | 2*e <sup>-21</sup>   | Thraustochytriidae sp. (Stramenopiles)          | 2*e <sup>-21</sup>    | 12                                            | 5, 6, 7                 |
| <i>Dactylopodola baltica</i>         | 3*e <sup>-90</sup>   | <i>Archaphanostoma macrospiriferum</i> (Acoela) | 0.0                   | 4, 12, 13, 14, 15                             | 1, 2, 5, 6, 7, 8, 9, 16 |
|                                      | 7*e <sup>-66</sup>   | Uncultured Ascomycota (Fungi)                   | 0.0                   |                                               |                         |
|                                      | 3*e <sup>-49</sup>   | Uncultured Distigma (Euglenozoa)                | 4*e <sup>-65</sup>    |                                               |                         |
|                                      | 3*e <sup>-44</sup>   | <i>Paralia sulcata</i> (Stramenopiles)          | 2*e <sup>-104</sup>   |                                               |                         |
|                                      | 1*e <sup>-34</sup>   | <i>Protostelium arachisporum</i> (Amoebozoa)    | 1*e <sup>-39</sup>    |                                               |                         |
| <i>Daphnia pulex</i>                 | 2*e <sup>-109</sup>  | <i>Vorticella</i> sp. (Alveolata)               | 0.0                   | 17                                            | 1, 5, 6, 7              |
| <i>Gnathostomula paradoxa</i>        | 2*e <sup>-133</sup>  | <i>Turbanella</i> sp. (Gastrotricha)            | 0.0                   | 4, 12, 13, 14, 17, 18, 19, 20, 21, 22, 23, 24 | 5, 6, 7, 8, 9, 16       |
|                                      | 4*e <sup>-86</sup>   | <i>Mesodinium pulex</i> (Alveolata)             | 0.0                   |                                               |                         |
|                                      | 1*e <sup>-62</sup>   | <i>Amastigomonas trahens</i> (Apusozoa)         | 4*e <sup>-131</sup>   |                                               |                         |
|                                      | 1*e <sup>-51</sup>   | <i>Parvamoeba rugata</i> (Amoebozoa)            | 2*e <sup>-133</sup>   |                                               |                         |
|                                      | 3*e <sup>-58</sup>   | <i>Caecitellus parvulus</i> (Stramenopiles)     | 4*e <sup>-136</sup>   |                                               |                         |
|                                      | 1*e <sup>-51</sup>   | <i>Parvamoeba rugata</i> (Amoebozoa)            | 2*e <sup>-133</sup>   |                                               |                         |
|                                      | 3*e <sup>-48</sup>   | <i>Oxnerella micra</i> (Centroheliozoa)         | 2*e <sup>-107</sup>   |                                               |                         |
|                                      | 1*e <sup>-47</sup>   | <i>Petalomonas cantuscygni</i> (Euglenozoa)     | 2*e <sup>-153</sup>   |                                               |                         |
|                                      | 4*e <sup>-22</sup>   | <i>Chaetospermum camelliae</i> (Fungi)          | 8*e <sup>-30</sup>    |                                               |                         |
| <i>Helobdella robusta</i>            | 5*e <sup>-37</sup>   | <i>Phycomyces blakesleeana</i> (Fungi)          | 4*e <sup>-81</sup>    | 4                                             | 1, 2, 5, 7              |
| <i>Lecane inermis</i>                | 2*e <sup>-56</sup>   | <i>Thormora jukesii</i> (Annelida)              | 2*e <sup>-51</sup>    | 1, 2, 5, 6, 17                                | 8, 9, 16                |
|                                      | 4*e <sup>-43</sup>   | <i>Tribolium castaneum</i> (Arthropoda)         | 5*e <sup>-40</sup>    |                                               |                         |
|                                      | 4*e <sup>-38</sup>   | <i>Cryptosporidium</i> sp. (Alveolata)          | 3*e <sup>-41</sup>    |                                               |                         |
| <i>Lepidodermella squamata</i>       | 3*e <sup>-113</sup>  | <i>Cryptomonas paramaecium</i> (Cryptophyta)    | 0.0                   | 4, 12, 13, 14, 25, 26                         | 1, 2, 5, 6, 7, 8, 9, 16 |
|                                      | 7*e <sup>-100</sup>  | <i>Spumella</i> sp. (Stramenopiles)             | 0.0                   |                                               |                         |
|                                      | 9*e <sup>-49</sup>   | <i>Cryptodiffugia operculata</i> (Amoebozoa)    | 0.0                   |                                               |                         |
|                                      | 6*e <sup>-41</sup>   | <i>Lindgomyces</i> sp. (Fungi)                  | 2*e <sup>-72</sup>    |                                               |                         |
|                                      | 2*e <sup>-31</sup>   | <i>Entosiphon</i> sp. (Euglenozoa)              | 0.0                   |                                               |                         |
|                                      | 4*e <sup>-27</sup>   | <i>Diphylleia rotans</i> (Collodictyonidae)     | 4*e <sup>-134</sup>   |                                               |                         |
| <i>Lumbricus rubellus</i>            | 2*e <sup>-24</sup>   | <i>Monocystis agilis</i> (Alveolata)            | 2*e <sup>-140</sup>   | 17                                            | 5, 6, 7                 |
| <i>Macrodasydys</i> sp.              | 5*e <sup>-79</sup>   | <i>Ceriantheopsis americana</i> (Cnidaria)      | 0.0                   | 27                                            | 1, 2, 5, 6, 7, 8, 9, 16 |
| <i>Megadasydys</i> sp.               | 5*e <sup>-65</sup>   | <i>Chromadoridae</i> sp. (Nematoda)             | 2*e <sup>-139</sup>   | 3, 17                                         | 5, 6, 7, 8, 9, 16       |
|                                      | 2*e <sup>-58</sup>   | <i>Gymnodinium eucyaneum</i> (Alveolata)        | 4*e <sup>-101</sup>   |                                               |                         |
| <i>Nematoplanea coelognoporoides</i> | 2*e <sup>-36</sup>   | <i>Gyptis pacifica</i> (Annelida)               | 1*e <sup>-39</sup>    | 5, 6                                          | 8, 9, 16                |
| <i>Rotaria rotatoria</i>             | 3*e <sup>-86</sup>   | <i>Notoplanea australis</i> (Platyhelminthes)   | 5*e <sup>-179</sup>   | 8, 13, 16, 27, 28                             | 1, 2, 5, 6, 7, 9        |
|                                      | 8*e <sup>-67</sup>   | <i>Vannella</i> sp. (Amoebozoa)                 | 0.0                   |                                               |                         |
|                                      | 8*e <sup>-57</sup>   | <i>Trinema lineare</i> (Cercaria)               | 7*e <sup>-131</sup>   |                                               |                         |
|                                      | 6*e <sup>-33</sup>   | Heterolobosea sp. (Heterolobosea)               | 6*e <sup>-138</sup>   |                                               |                         |
| <i>Schistosoma japonica</i>          | 0.0                  | <i>Sus scrofa</i> (Mammalia)                    | 0.0                   | 7, 29                                         | 5, 6, 8, 9, 16          |
|                                      | 3*e <sup>-53</sup>   | <i>Truncatella scalaris</i> (Mollusca)          | 7*e <sup>-84</sup>    |                                               |                         |
| <i>Schistosoma mansoni</i>           | 2*e <sup>-117</sup>  | <i>Adineta vaga</i> (Syndermata)                | 0.0                   | 1, 2, 9                                       | 5, 6, 7, 8              |
|                                      | 4*e <sup>-31</sup>   | <i>Bradysia tilicola</i> (Hexapoda)             | 3*e <sup>-83</sup>    |                                               |                         |
| <i>Stylochoplana maculata</i>        | 7*e <sup>-47</sup>   | <i>Platydasys</i> sp. (Gastrotricha)            | 3*e <sup>-46</sup>    | 18, 19, 20, 21, 22                            | 1, 2, 5, 6, 7, 8, 9, 16 |

- <sup>1</sup> *Apis mellifera* (Arthropoda)
- <sup>2</sup> *Daphnia pulex* (Arthropoda)
- <sup>3</sup> *Caenorhabditis elegans* (Nematoda)
- <sup>4</sup> *Schizosaccharomyces cerevisiae* (Fungi)
- <sup>5</sup> *Capitella teleta* (Annelida)
- <sup>6</sup> *Helobdella robusta* (Annelida)
- <sup>7</sup> *Lottia gigantea* (Mollusca)
- <sup>8</sup> *Schmidtea mediterranea* (Platyhelminthes)
- <sup>9</sup> *Brachionus plicatilis* (Syndermata)
- <sup>10</sup> Ichthyosporea
- <sup>11</sup> *Cabomba aquatica*, *Persea americana*, *Liriodendron tulipifera*, *Nuphar advena* (all Chlorophyta)
- <sup>12</sup> *Phytophthora capsici*, *Albugo candida*, *Blastocystis hominis*, *Pseudochattonella farcimen*, *Phytophthora cactorum*, *Phytophthora infestans*, *Saccharina japonica*, *Ochromonas danica*, *Fragilariopsis cylindrus*, *Ectocarpus siliculosus*, *Pythium ultimum*, *Phaeodactylum tricornutum* (all Stramenopiles)
- <sup>13</sup> *Entamoeba histolytica*, *Dictyostelium purpureum*, *Dictyostelium discoideum*, *Physarum polycephalum*, *Mastigamoeba balamuthi*, *Vermamoeba vermiformis*, *Acanthamoeba castellanii* (all Amoebozoa)
- <sup>14</sup> *Trypanosoma cruzi*, *Trypanosoma congolense*, *Trypanosoma brucei*, *Trypanosoma rangeli*, *Euglena longa*, *Euglena gracilis*, *Diplonema papillatum*, *Leishmania chagasi*, *Leishmania major* (all Euglenozoa)
- <sup>15</sup> Acoelomorpha
- <sup>16</sup> *Schistosoma mansoni* (Platyhelminthes)
- <sup>17</sup> *Eimeria tenella*, *Eimeria maxima*, *Eimeria acervulina*, *Oxyrrhis marina*, *Plasmodium berghei*, *Plasmodium falciparum*, *Plasmodium yoelii*, *Plasmodium vivax*, *Babesia equi*, *Alexandrium minutum*, *Alexandrium tamarense*, *Anophryoides haemophila*, *Cryptosporidium parvum*, *Cryptosporidium muris*, *Theileria orientalis*, *Theileria annulata*, *Sterkiella histriomuscorum*, *Symbiodinium sp.*, *Tetrahymena thermophila*, *Perkinsus marinus*, *Karenia brevis*, *Polyplastron multivesiculatum*, *Paramecium tetraurelia*, *Ichthyophthirius multifiliis*, *Karlodinium micrum*, *Toxoplasma gondii*, *Lingulodinium polyedrum*, *Neospora caninum* (all Alveolata)
- <sup>18</sup> *Megadasys sp.* (Gastrotricha)
- <sup>19</sup> *Dactylopodola baltica* (Gastrotricha)
- <sup>20</sup> *Lepidodermella squamata* (Gastrotricha)
- <sup>21</sup> *Megadasys sp.* (Gastrotricha)
- <sup>22</sup> *Turbanella ambronensis* (Gastrotricha)
- <sup>23</sup> Apusozoa
- <sup>24</sup> Centroheliozoa
- <sup>25</sup> Cryptophyta
- <sup>26</sup> Collodictyonidae
- <sup>27</sup> *Nematostella vectensis* (Cnidaria)
- <sup>27</sup> Cercozoa
- <sup>28</sup> Heterolobosea
- <sup>29</sup> *Macaca fascicularis* (Mammalia)

**Table S7.** Results of the contamination screening against the 559 gene datasets in our study using three different pruning strategies. Sequences were pruned either (1) when the best hit was a hit against a negative reference sequence, (2) when the best hit was a hit against a negative reference sequence and the e-value was at least one magnitude lower than the best positive hit or (3) when the best hit was a hit against a negative reference sequence and the e-value was at least four magnitudes lower than the best positive hit.

| Affected taxon                        | Paralogy screening<br># | Best hit |       | Pruning strategy |       |              |       |
|---------------------------------------|-------------------------|----------|-------|------------------|-------|--------------|-------|
|                                       |                         | #        | %     | 1 magnitude      |       | 4 magnitudes |       |
|                                       |                         | #        | %     | #                | %     | #            | %     |
| <i>Alvinella pompejana</i>            | 453                     | 42       | 9.27  | 32               | 7.06  | 11           | 2.43  |
| <i>Aplysia californica</i>            | 439                     | 39       | 8.88  | 30               | 6.83  | 11           | 2.51  |
| <i>Biomphalaria glabrata</i>          | 263                     | 15       | 5.70  | 12               | 4.56  | 6            | 2.28  |
| <i>Capitella teleta</i>               | 492                     | 2        | 0.41  | 1                | 0.20  | 1            | 0.20  |
| <i>Crassostrea gigas</i>              | 399                     | 3        | 0.75  | 3                | 0.75  | 0            | 0.00  |
| <i>Dactylopodola baltica</i>          | 347                     | 57       | 16.43 | 51               | 14.70 | 42           | 12.10 |
| <i>Daphnia pulex</i>                  | 498                     | 13       | 2.61  | 13               | 2.61  | 4            | 0.80  |
| <i>Gnathostomula paradoxa</i>         | 306                     | 87       | 28.43 | 77               | 25.16 | 28           | 9.15  |
| <i>Helobdella robusta</i>             | 520                     | 0        | 0.00  | 0                | 0.00  | 0            | 0.00  |
| <i>Lecane inermis</i>                 | 210                     | 30       | 14.29 | 29               | 13.81 | 17           | 8.10  |
| <i>Lepidodermella squamata</i>        | 296                     | 74       | 25.00 | 71               | 23.99 | 52           | 17.57 |
| <i>Lumbricus rubellus</i>             | 206                     | 3        | 1.46  | 3                | 1.46  | 0            | 0.00  |
| <i>Macrodasys sp.</i>                 | 272                     | 39       | 14.34 | 26               | 9.56  | 15           | 5.51  |
| <i>Megadasys sp.</i>                  | 355                     | 70       | 19.72 | 60               | 16.90 | 30           | 8.45  |
| <i>Nematoplana coelogygnoporoides</i> | 58                      | 26       | 44.83 | 17               | 29.31 | 7            | 12.07 |
| <i>Rotaria rotatoria</i>              | 232                     | 16       | 6.90  | 12               | 5.17  | 3            | 1.29  |
| <i>Schistosoma japonicum</i>          | 470                     | 34       | 7.23  | 27               | 5.74  | 9            | 1.91  |
| <i>Schistosoma mansoni</i>            | 437                     | 79       | 18.08 | 60               | 13.73 | 10           | 2.29  |
| <i>Stylochoplanea maculata</i>        | 392                     | 29       | 7.40  | 20               | 5.10  | 1            | 0.26  |



**Table S8.** Summary of the effect of pruning after the paralogy and additionally contamination screening on gene and sequence coverage for the dataset d01. NP = not pruned, PS = pruning after paralogy screening, CS = pruning after additionally contamination screening.

| GeneID | #taxa |    |    |
|--------|-------|----|----|
|        | NP    | PS | CS |
| 111203 | 31    | 31 | 29 |
| 111204 | 39    | 39 | 38 |
| 111206 | 19    | 19 | 17 |
| 111213 | 20    | 20 | 19 |
| 111214 | 41    | 41 | 36 |
| 111215 | 38    | 38 | 32 |
| 111216 | 46    | 46 | 44 |
| 111217 | 46    | 46 | 43 |
| 111222 | 33    | 33 | 30 |
| 111229 | 43    | 33 | 31 |
| 111232 | 30    | 30 | 28 |
| 111234 | 25    | 25 | 24 |
| 111237 | 27    | 27 | 27 |
| 111238 | 28    | 28 | 27 |
| 111239 | 23    | 23 | 22 |
| 111243 | 34    | 34 | 34 |
| 111247 | 29    | 29 | 27 |
| 111249 | 36    | 36 | 36 |
| 111251 | 27    | 27 | 25 |
| 111259 | 40    | 40 | 40 |
| 111260 | 20    | 20 | 16 |
| 111265 | 29    | 29 | 29 |
| 111266 | 40    | 40 | 38 |
| 111267 | 19    | 19 | 19 |
| 111268 | 22    | 22 | 16 |
| 111269 | 27    | 27 | 24 |
| 111271 | 29    | 27 | 27 |
| 111272 | 26    | 26 | 20 |
| 111273 | 28    | 25 | 24 |
| 111274 | 46    | 46 | 43 |
| 111275 | 36    | 36 | 36 |
| 111276 | 28    | 28 | 27 |
| 111277 | 45    | 45 | 41 |
| 111278 | 31    | 31 | 29 |
| 111281 | 46    | 46 | 43 |
| 111282 | 26    | 14 | 8  |
| 111283 | 21    | 21 | 21 |
| 111284 | 22    | 22 | 17 |
| 111286 | 49    | 49 | 48 |
| 111287 | 36    | 36 | 30 |
| 111290 | 27    | 27 | 27 |
| 111291 | 26    | 26 | 25 |
| 111295 | 26    | 26 | 26 |
| 111296 | 24    | 24 | 20 |
| 111298 | 18    | 18 | 18 |
| 111299 | 33    | 31 | 32 |
| 111300 | 31    | 31 | 28 |
| 111309 | 26    | 26 | 22 |
| 111313 | 29    | 29 | 29 |
| 111316 | 34    | 34 | 32 |
| 111318 | 41    | 41 | 36 |
| 111319 | 24    | 24 | 22 |
| 111320 | 26    | 26 | 21 |
| 111321 | 26    | 26 | 25 |
| 111324 | 41    | 41 | 40 |
| 111328 | 31    | 31 | 30 |
| 111329 | 32    | 32 | 25 |
| 111335 | 34    | 34 | 32 |
| 111345 | 23    | 23 | 21 |
| 111347 | 36    | 36 | 34 |
| 111348 | 31    | 31 | 31 |
| 111349 | 28    | 28 | 27 |
| 111352 | 28    | 17 | 15 |
| 111357 | 27    | 25 | 21 |
| 111359 | 22    | 22 | 19 |
| 111365 | 35    | 35 | 34 |
| 111375 | 25    | 25 | 25 |
| 111379 | 32    | 28 | 27 |

| GeneID | #taxa |    |    |
|--------|-------|----|----|
|        | NP    | PS | CS |
| 111387 | 37    | 34 | 34 |
| 111388 | 23    | 23 | 23 |
| 111391 | 29    | 29 | 28 |
| 111393 | 31    | 31 | 30 |
| 111394 | 45    | 45 | 44 |
| 111399 | 25    | 25 | 18 |
| 111401 | 31    | 31 | 24 |
| 111402 | 24    | 24 | 24 |
| 111404 | 32    | 30 | 24 |
| 111405 | 32    | 32 | 30 |
| 111409 | 34    | 34 | 34 |
| 111413 | 33    | 33 | 32 |
| 111414 | 37    | 30 | 24 |
| 111415 | 26    | 26 | 25 |
| 111418 | 25    | 23 | 18 |
| 111419 | 33    | 33 | 32 |
| 111421 | 31    | 31 | 30 |
| 111423 | 35    | 35 | 35 |
| 111425 | 31    | 26 | 24 |
| 111426 | 26    | 26 | 25 |
| 111427 | 33    | 31 | 26 |
| 111428 | 20    | 20 | 16 |
| 111429 | 36    | 36 | 34 |
| 111430 | 33    | 33 | 32 |
| 111431 | 24    | 19 | 15 |
| 111432 | 38    | 38 | 37 |
| 111433 | 34    | 23 | 19 |
| 111435 | 42    | 39 | 35 |
| 111436 | 25    | 25 | 24 |
| 111439 | 28    | 28 | 27 |
| 111440 | 33    | 33 | 28 |
| 111441 | 31    | 31 | 28 |
| 111447 | 23    | 23 | 22 |
| 111448 | 31    | 31 | 22 |
| 111450 | 23    | 23 | 23 |
| 111451 | 25    | 25 | 24 |
| 111453 | 40    | 40 | 40 |
| 111454 | 29    | 29 | 29 |
| 111457 | 32    | 32 | 28 |
| 111458 | 21    | 21 | 21 |
| 111459 | 30    | 25 | 20 |
| 111463 | 29    | 29 | 28 |
| 111464 | 17    | 17 | 14 |
| 111466 | 53    | 53 | 47 |
| 111468 | 21    | 21 | 20 |
| 111469 | 27    | 27 | 26 |
| 111475 | 40    | 40 | 38 |
| 111483 | 26    | 26 | 25 |
| 111484 | 24    | 17 | 17 |
| 111485 | 33    | 33 | 28 |
| 111486 | 38    | 38 | 37 |
| 111487 | 23    | 23 | 20 |
| 111488 | 26    | 26 | 26 |
| 111489 | 27    | 27 | 26 |
| 111490 | 26    | 26 | 24 |
| 111491 | 44    | 44 | 40 |
| 111492 | 33    | 33 | 26 |
| 111495 | 25    | 25 | 25 |
| 111496 | 37    | 34 | 35 |
| 111497 | 30    | 30 | 28 |
| 111504 | 30    | 28 | 26 |
| 111506 | 21    | 21 | 19 |
| 111507 | 23    | 17 | 21 |
| 111510 | 39    | 39 | 37 |
| 111511 | 34    | 34 | 34 |
| 111516 | 36    | 36 | 36 |
| 111517 | 27    | 27 | 23 |
| 111518 | 25    | 25 | 25 |

| GeneID | #taxa |    |    |
|--------|-------|----|----|
|        | NP    | PS | CS |
| 111519 | 28    | 28 | 27 |
| 111521 | 32    | 32 | 31 |
| 111524 | 38    | 38 | 38 |
| 111527 | 44    | 42 | 43 |
| 111530 | 26    | 26 | 24 |
| 111532 | 35    | 35 | 32 |
| 111538 | 44    | 44 | 41 |
| 111539 | 38    | 38 | 38 |
| 111542 | 36    | 36 | 36 |
| 111546 | 49    | 49 | 43 |
| 111549 | 34    | 32 | 33 |
| 111550 | 43    | 43 | 40 |
| 111552 | 32    | 32 | 22 |
| 111554 | 22    | 22 | 22 |
| 111555 | 44    | 44 | 40 |
| 111558 | 16    | 16 | 16 |
| 111560 | 22    | 22 | 19 |
| 111566 | 36    | 36 | 32 |
| 111567 | 30    | 30 | 30 |
| 111568 | 33    | 33 | 30 |
| 111570 | 26    | 26 | 22 |
| 111571 | 23    | 23 | 21 |
| 111572 | 44    | 40 | 38 |
| 111573 | 18    | 18 | 17 |
| 111576 | 28    | 28 | 24 |
| 111579 | 36    | 36 | 34 |
| 111580 | 25    | 25 | 20 |
| 111582 | 30    | 30 | 25 |
| 111583 | 25    | 25 | 24 |
| 111585 | 32    | 32 | 29 |
| 111587 | 39    | 37 | 34 |
| 111588 | 23    | 23 | 23 |
| 111589 | 26    | 22 | 21 |
| 111591 | 21    | 21 | 19 |
| 111595 | 40    | 40 | 39 |
| 111596 | 39    | 27 | 24 |
| 111598 | 32    | 30 | 31 |
| 111599 | 43    | 43 | 38 |
| 111600 | 26    | 26 | 26 |
| 111603 | 33    | 33 | 32 |
| 111604 | 29    | 29 | 28 |
| 111606 | 22    | 22 | 21 |
| 111608 | 27    | 27 | 25 |
| 111611 | 22    | 22 | 17 |
| 111616 | 28    | 28 | 19 |
| 111618 | 38    | 38 | 37 |
| 111619 | 30    | 28 | 26 |
| 111620 | 29    | 29 | 28 |
| 111622 | 49    | 49 | 45 |
| 111623 | 36    | 36 | 36 |
| 111625 | 26    | 26 | 25 |
| 111626 | 37    | 37 | 35 |
| 111628 | 30    | 30 | 27 |
| 111629 | 33    | 33 | 33 |
| 111631 | 30    | 30 | 28 |
| 111634 | 34    | 34 | 31 |
| 111636 | 26    | 26 | 25 |
| 111638 | 34    | 34 | 34 |
| 111639 | 31    | 31 | 31 |
| 111641 | 28    | 28 | 23 |
| 111643 | 28    | 28 | 27 |
| 111644 | 30    | 23 | 18 |
| 111648 | 30    | 30 | 29 |
| 111653 | 27    | 27 | 27 |
| 111654 | 27    | 27 | 25 |
| 111657 | 50    | 46 | 38 |
| 111660 | 23    | 13 | 13 |
| 111661 | 27    | 27 | 27 |

| GeneID | #taxa |    |    |
|--------|-------|----|----|
|        | NP    | PS | CS |
| 111662 | 21    | 21 | 17 |
| 111663 | 30    | 22 | 16 |
| 111665 | 21    | 21 | 21 |
| 111668 | 28    | 28 | 24 |
| 111670 | 27    | 27 | 23 |
| 111676 | 29    | 29 | 25 |
| 111677 | 28    | 28 | 28 |
| 111678 | 35    | 35 | 33 |
| 111680 | 24    | 24 | 22 |
| 111686 | 38    | 38 | 33 |
| 111687 | 45    | 45 | 44 |
| 111689 | 39    | 39 | 30 |
| 111695 | 32    | 27 | 28 |
| 111698 | 22    | 22 | 22 |
| 111699 | 27    | 27 | 27 |
| 111700 | 22    | 22 | 20 |
| 111702 | 39    | 39 | 37 |
| 111703 | 30    | 30 | 30 |
| 111704 | 23    | 23 | 21 |
| 111711 | 46    | 46 | 41 |
| 111714 | 37    | 37 | 37 |
| 111715 | 23    | 23 | 22 |
| 111721 | 28    | 25 | 22 |
| 111723 | 36    | 27 | 23 |
| 111724 | 43    | 37 | 36 |
| 111728 | 24    | 24 | 24 |
| 111730 | 35    | 35 | 33 |
| 111731 | 36    | 36 | 34 |
| 111732 | 36    | 36 | 33 |
| 111733 | 37    | 37 | 34 |
| 111736 | 25    | 25 | 24 |
| 111738 | 30    | 30 | 24 |
| 111739 | 25    | 25 | 23 |
| 111741 | 35    | 35 | 27 |
| 111742 | 26    | 18 | 15 |
| 111744 | 47    | 47 | 45 |
| 111747 | 27    | 27 | 24 |
| 111748 | 20    | 20 | 20 |
| 111749 | 25    | 25 | 19 |
| 111751 | 19    | 19 | 16 |
| 111752 | 36    | 36 | 35 |
| 111754 | 30    | 30 | 28 |
| 111763 | 40    | 40 | 39 |
| 111764 | 32    | 32 | 32 |
| 111767 | 26    | 26 | 25 |
| 111768 | 34    | 34 | 33 |
| 111769 | 27    | 27 | 24 |
| 111770 | 24    | 24 | 20 |
| 111772 | 20    | 20 | 20 |
| 111775 | 42    | 42 | 41 |
| 111776 | 40    | 38 | 32 |
| 111778 | 29    | 27 | 25 |
| 111779 | 24    | 24 | 23 |
| 111781 | 26    | 26 | 26 |
| 111784 | 22    | 22 | 21 |
| 111785 | 32    | 32 | 30 |
| 111787 | 26    | 26 | 25 |
| 111789 | 32    | 32 | 29 |
| 111796 | 25    | 25 | 24 |
| 111797 | 35    | 35 | 34 |
| 111803 | 29    | 29 | 28 |
| 111807 | 26    | 18 | 18 |
| 111811 | 46    | 46 | 45 |
| 111812 | 26    | 26 | 23 |
| 111813 | 43    | 43 | 43 |
| 111814 | 45    | 43 | 41 |
| 111815 | 39    | 39 | 36 |
| 111816 | 44    | 44 | 41 |

| GeneID | #taxa |    |    |
|--------|-------|----|----|
|        | NP    | PS | CS |
| 111818 | 28    | 28 | 23 |
| 111820 | 33    | 30 | 22 |
| 111821 | 26    | 26 | 23 |
| 111825 | 26    | 26 | 26 |
| 111827 | 29    | 27 | 26 |
| 111829 | 41    | 41 | 39 |
| 111830 | 42    | 42 | 40 |
| 111838 | 22    | 22 | 22 |
| 111840 | 30    | 30 | 30 |
| 111845 | 20    | 20 | 18 |
| 111847 | 28    | 23 | 21 |
| 111848 | 31    | 31 | 27 |
| 111849 | 35    | 35 | 31 |
| 111861 | 42    | 36 | 27 |
| 111862 | 30    | 30 | 29 |
| 111863 | 31    | 26 | 24 |
| 111865 | 24    | 24 | 24 |
| 111866 | 40    | 40 | 32 |
| 111870 | 30    | 30 | 28 |
| 111871 | 27    | 21 | 20 |
| 111873 | 45    | 45 | 43 |
| 111874 | 29    | 29 | 24 |
| 111876 | 35    | 31 | 23 |
| 111879 | 22    | 22 | 21 |
| 111884 | 23    | 23 | 20 |
| 111889 | 28    | 28 | 27 |
| 111890 | 21    | 19 | 14 |
| 111892 | 31    | 25 | 21 |
| 111893 | 42    | 42 | 42 |
| 111894 | 23    | 23 | 18 |
| 111898 | 41    | 41 | 41 |
| 111900 | 26    | 26 | 25 |
| 111902 | 21    | 21 | 19 |
| 111903 | 25    | 25 | 20 |
| 111904 | 33    | 33 | 27 |
| 111905 | 24    | 24 | 23 |
| 111907 | 39    | 39 | 39 |
| 111912 | 23    | 23 | 22 |
| 111916 | 32    | 32 | 32 |
| 111917 | 48    | 48 | 46 |
| 111919 | 23    | 23 | 23 |
| 111923 | 28    | 28 | 20 |
| 111924 | 20    | 20 | 15 |
| 111925 | 35    | 35 | 32 |
| 111931 | 33    | 33 | 29 |
| 111935 | 50    | 50 | 45 |
| 111936 | 34    | 34 | 33 |
| 111938 | 30    | 30 | 26 |
| 111939 | 31    | 31 | 31 |
| 111945 | 43    | 43 | 39 |
| 111946 | 26    | 26 | 26 |
| 111948 | 24    | 24 | 22 |
| 111950 | 26    | 26 | 24 |
| 111951 | 22    | 22 | 22 |
| 111952 | 30    | 30 | 28 |
| 111953 | 31    | 29 | 20 |
| 111956 | 44    | 44 | 39 |
| 111957 | 25    | 25 | 24 |
| 111958 | 29    | 27 | 27 |
| 111959 | 32    | 32 | 29 |
| 111960 | 31    | 31 | 31 |
| 111962 | 34    | 34 | 30 |
| 111964 | 21    | 21 | 20 |
| 111968 | 32    | 27 | 22 |
| 111969 | 32    | 32 | 29 |
| 111970 | 23    | 23 | 17 |
| 111971 | 23    | 19 | 23 |
| 111973 | 33    | 33 | 32 |
| 111981 | 30    | 30 | 27 |
| 111984 | 31    | 31 | 30 |
| 111987 | 24    | 24 | 20 |
| 111988 | 40    | 40 | 37 |
| 111989 | 46    | 46 | 37 |
| 111992 | 20    | 20 | 19 |
| 111995 | 32    | 32 | 31 |

| GeneID | #taxa |    |    |
|--------|-------|----|----|
|        | NP    | PS | CS |
| 111997 | 24    | 24 | 23 |
| 111998 | 35    | 33 | 33 |
| 112002 | 34    | 23 | 21 |
| 112003 | 42    | 42 | 41 |
| 112007 | 28    | 28 | 28 |
| 112011 | 28    | 28 | 27 |
| 112012 | 30    | 28 | 29 |
| 112013 | 26    | 26 | 26 |
| 112018 | 24    | 24 | 24 |
| 112020 | 25    | 25 | 24 |
| 112021 | 20    | 20 | 19 |
| 112028 | 24    | 24 | 23 |
| 112029 | 29    | 29 | 29 |
| 112030 | 19    | 19 | 18 |
| 112034 | 45    | 45 | 42 |
| 112037 | 41    | 41 | 38 |
| 112038 | 47    | 47 | 43 |
| 112040 | 35    | 35 | 33 |
| 112041 | 24    | 24 | 22 |
| 112044 | 29    | 29 | 27 |
| 112047 | 24    | 24 | 19 |
| 112050 | 21    | 21 | 17 |
| 112052 | 33    | 31 | 31 |
| 112053 | 20    | 18 | 17 |
| 112056 | 31    | 31 | 29 |
| 112059 | 22    | 22 | 20 |
| 112060 | 21    | 21 | 21 |
| 112066 | 28    | 26 | 26 |
| 112067 | 45    | 45 | 43 |
| 112071 | 25    | 25 | 25 |
| 112072 | 26    | 26 | 26 |
| 112076 | 33    | 33 | 33 |
| 112077 | 26    | 26 | 26 |
| 112081 | 33    | 33 | 29 |
| 112083 | 36    | 36 | 35 |
| 112085 | 28    | 28 | 28 |
| 112087 | 28    | 24 | 23 |
| 112088 | 36    | 36 | 32 |
| 112093 | 21    | 21 | 19 |
| 112094 | 19    | 19 | 19 |
| 112102 | 42    | 42 | 38 |
| 112105 | 31    | 31 | 29 |
| 112106 | 34    | 23 | 23 |
| 112107 | 38    | 38 | 33 |
| 112108 | 38    | 38 | 35 |
| 112110 | 29    | 29 | 26 |
| 112111 | 26    | 26 | 22 |
| 112113 | 31    | 27 | 27 |
| 112115 | 48    | 48 | 42 |
| 112117 | 22    | 22 | 22 |
| 112118 | 26    | 26 | 22 |
| 112121 | 27    | 23 | 21 |
| 112123 | 39    | 39 | 39 |
| 112124 | 32    | 28 | 27 |
| 112126 | 31    | 31 | 30 |
| 112129 | 34    | 34 | 34 |
| 112130 | 36    | 36 | 34 |
| 112135 | 21    | 21 | 19 |
| 112137 | 28    | 28 | 24 |
| 112141 | 35    | 35 | 32 |
| 112142 | 35    | 35 | 28 |
| 112144 | 33    | 33 | 31 |
| 112145 | 34    | 34 | 30 |
| 112147 | 35    | 35 | 32 |
| 112149 | 26    | 26 | 26 |
| 112151 | 25    | 25 | 25 |
| 112152 | 21    | 21 | 20 |
| 112156 | 33    | 33 | 31 |
| 112157 | 26    | 26 | 21 |
| 112158 | 28    | 28 | 27 |
| 112159 | 29    | 29 | 26 |
| 112160 | 33    | 33 | 33 |
| 112163 | 29    | 29 | 26 |
| 112164 | 36    | 36 | 35 |
| 112167 | 21    | 21 | 21 |

| GeneID | #taxa |    |    |
|--------|-------|----|----|
|        | NP    | PS | CS |
| 112168 | 32    | 32 | 28 |
| 112169 | 35    | 33 | 31 |
| 112173 | 30    | 30 | 26 |
| 112174 | 28    | 28 | 24 |
| 112176 | 32    | 32 | 29 |
| 112178 | 37    | 35 | 35 |
| 112180 | 20    | 20 | 20 |
| 112181 | 42    | 42 | 35 |
| 112182 | 30    | 30 | 30 |
| 112183 | 33    | 31 | 27 |
| 112184 | 26    | 26 | 26 |
| 112186 | 35    | 35 | 32 |
| 112187 | 38    | 38 | 30 |
| 112195 | 44    | 44 | 41 |
| 112197 | 24    | 24 | 23 |
| 112199 | 34    | 34 | 28 |
| 112201 | 22    | 22 | 21 |
| 112202 | 43    | 43 | 41 |
| 112203 | 33    | 30 | 29 |
| 112204 | 42    | 40 | 40 |
| 112206 | 37    | 35 | 36 |
| 112207 | 28    | 28 | 28 |
| 112211 | 25    | 25 | 24 |
| 112214 | 22    | 22 | 22 |
| 112219 | 24    | 24 | 20 |
| 112221 | 22    | 22 | 19 |
| 112222 | 23    | 17 | 16 |
| 112223 | 44    | 44 | 40 |
| 112224 | 26    | 26 | 26 |
| 112226 | 27    | 27 | 27 |
| 112227 | 23    | 23 | 22 |
| 112235 | 28    | 28 | 28 |
| 112240 | 22    | 22 | 22 |
| 112242 | 43    | 43 | 42 |
| 112243 | 20    | 11 | 10 |
| 112247 | 35    | 35 | 33 |
| 112251 | 23    | 23 | 22 |
| 112252 | 26    | 26 | 23 |
| 112254 | 40    | 40 | 38 |
| 112255 | 34    | 34 | 24 |
| 112256 | 33    | 33 | 32 |
| 112259 | 24    | 24 | 24 |
| 112263 | 26    | 21 | 17 |
| 112268 | 27    | 27 | 27 |
| 112270 | 21    | 21 | 21 |
| 112271 | 28    | 28 | 28 |
| 112275 | 22    | 22 | 19 |
| 112279 | 29    | 29 | 26 |
| 112280 | 38    | 38 | 38 |
| 112281 | 24    | 19 | 14 |
| 112284 | 39    | 39 | 32 |
| 112286 | 41    | 41 | 41 |
| 112291 | 33    | 33 | 33 |
| 112292 | 29    | 29 | 29 |
| 112293 | 25    | 22 | 22 |
| 112297 | 45    | 43 | 43 |
| 112298 | 38    | 38 | 38 |
| 112299 | 22    | 22 | 22 |
| 112300 | 34    | 34 | 29 |
| 112301 | 40    | 40 | 37 |
| 112307 | 24    | 24 | 24 |
| 112308 | 23    | 23 | 22 |
| 112310 | 33    | 31 | 30 |
| 112311 | 31    | 31 | 29 |
| 112312 | 29    | 29 | 29 |
| 112315 | 35    | 35 | 30 |
| 112316 | 26    | 22 | 21 |
| 112319 | 27    | 27 | 26 |
| 112322 | 53    | 53 | 51 |
| 112324 | 31    | 31 | 29 |
| 112327 | 31    | 31 | 31 |
| 112329 | 33    | 33 | 29 |
| 112332 | 28    | 28 | 28 |
| 112334 | 30    | 30 | 28 |
| 112335 | 27    | 27 | 27 |

| GeneID | #taxa |    |    |
|--------|-------|----|----|
|        | NP    | PS | CS |
| 112339 | 39    | 39 | 39 |
| 112341 | 24    | 24 | 22 |
| 112342 | 26    | 26 | 24 |
| 112345 | 41    | 41 | 40 |
| 112349 | 37    | 37 | 37 |
| 112350 | 39    | 30 | 28 |
| 112352 | 25    | 23 | 21 |
| 112354 | 45    | 45 | 40 |
| 112355 | 40    | 40 | 37 |
| 112358 | 45    | 45 | 42 |
| 112359 | 45    | 45 | 43 |
| 112360 | 25    | 25 | 23 |
| 112364 | 29    | 29 | 28 |
| 112365 | 22    | 22 | 21 |
| 112366 | 40    | 40 | 39 |
| 112367 | 34    | 34 | 29 |
| 112369 | 31    | 28 | 28 |
| 112375 | 24    | 24 | 24 |
| 112376 | 28    | 28 | 27 |
| 112379 | 27    | 27 | 27 |
| 112380 | 39    | 31 | 31 |
| 112381 | 37    | 35 | 35 |
| 112382 | 31    | 31 | 29 |
| 112383 | 26    | 26 | 25 |
| 112386 | 28    | 28 | 25 |
| 112388 | 21    | 21 | 20 |
| 112389 | 30    | 30 | 26 |
| 112390 | 30    | 28 | 24 |
| 112391 | 35    | 35 | 35 |
| 112392 | 32    | 32 | 31 |
| 112394 | 41    | 41 | 37 |
| 112395 | 33    | 33 | 25 |
| 112399 | 31    | 24 | 23 |
| 112402 | 26    | 26 | 25 |
| 112403 | 25    | 25 | 23 |
| 112405 | 24    | 18 | 17 |
| 112406 | 27    | 22 | 19 |
| 112407 | 46    | 46 | 46 |
| 112414 | 41    | 41 | 38 |
| 112415 | 30    | 30 | 28 |
| 112416 | 35    | 35 | 33 |
| 112417 | 36    | 34 | 32 |
| 112420 | 27    | 27 | 23 |
| 112421 | 25    | 23 | 23 |
| 112422 | 29    | 29 | 28 |
| 112425 | 46    | 44 | 36 |
| 112427 | 29    | 27 | 24 |
| 112432 | 31    | 31 | 31 |
| 112433 | 35    | 35 | 35 |
| 112434 | 30    | 30 | 26 |
| 112436 | 47    | 47 | 41 |
| 112437 | 35    | 35 | 27 |
| 112438 | 34    | 34 | 33 |
| 112443 | 32    | 32 | 32 |
| 112445 | 35    | 35 | 35 |
| 112446 | 43    | 43 | 41 |
| 112447 | 20    | 20 | 19 |
| 112448 | 42    | 42 | 41 |
| 112449 | 30    | 30 | 29 |
| 112450 | 29    | 27 | 27 |
| 112451 | 41    | 41 | 36 |
| 112452 | 23    | 23 | 21 |

| #taxa              | NP     | PS     | CS     |
|--------------------|--------|--------|--------|
| mean #taxa/gene    | 31     | 30.3   | 28.2   |
| gene coverage      | 47.7   | 46.5   | 43.3   |
| sum of sequences   | 17,329 | 16,913 | 15,737 |
| # pruned sequences |        | 416    | 1,176  |
| % pruned sequences |        | 2.4    | 7.0    |

| #positions            | NP        | PS        | CS        |
|-----------------------|-----------|-----------|-----------|
| # characters          | 2,187,530 | 2,143,203 | 2,045,827 |
| # possible characters | 5,340,530 | 5,340,530 | 5,340,530 |
| sequence coverage     | 41.0      | 40.1      | 38.3      |
| #pruned characters    |           | 44,327    | 97,376    |
| % pruned characters   |           | 2.0       | 4.5       |

**Table S9.** Information regarding the datasets after data partitioning.

| <b>Dataset</b> | <b>Partition</b>                                  | <b>#genes</b> | <b>gene coverage</b> | <b>#positions</b> | <b>sequence coverage</b> |
|----------------|---------------------------------------------------|---------------|----------------------|-------------------|--------------------------|
| <i>d01</i>     | <i>MARE setting: d value = 0.5</i>                | 559           | 43.3                 | 82,162            | 38.3                     |
| <i>d02</i>     | <i>low degrees of missing data</i>                | 232           | 51.9                 | 36,513            | 46.1                     |
| <i>d03</i>     | <i>low to medium-high degrees of missing data</i> | 413           | 46.3                 | 61,059            | 41.2                     |
| <i>d04</i>     | <i>MARE setting: d value = 1.0</i>                | 340           | 47.3                 | 53,080            | 42.0                     |
| <i>d05</i>     | <i>MARE setting: d value = 1.5</i>                | 235           | 50.1                 | 37,779            | 44.5                     |
| <i>d06</i>     | <i>MARE setting: d value = 2.0</i>                | 174           | 52.4                 | 27,596            | 46.9                     |
| <i>d07</i>     | <i>low base composition heterogeneity</i>         | 217           | 48.8                 | 37,907            | 43.2                     |
| <i>d08</i>     | <i>low branch length heterogeneity</i>            | 187           | 44.1                 | 29,133            | 39.7                     |
| <i>d09</i>     | <i>70% confidence interval</i>                    | 446           | 42.4                 | 67,275            | 37.4                     |
| <i>d10</i>     | <i>95% confidence interval</i>                    | 537           | 43.3                 | 79,786            | 38.3                     |

**Table S10.** Leaf stability indices for platyzoan taxa in the analyses of dataset d01.

| Leaf stability indices                  |        |
|-----------------------------------------|--------|
| <i>Paraplanocera sp</i>                 | 0.9845 |
| <i>Stylochoplana maculata</i>           | 0.9845 |
| <i>Macrostomum lignano</i>              | 0.9843 |
| <i>Spirometra erinacei</i>              | 0.9838 |
| <i>Moniezia expansa</i>                 | 0.9838 |
| <i>Taenia solium</i>                    | 0.9838 |
| <i>Echinococcus granulosus</i>          | 0.9838 |
| <i>Echinococcus multilocularis</i>      | 0.9838 |
| <i>Opisthorchis viverrini</i>           | 0.9838 |
| <i>Clonorchis sinensis</i>              | 0.9838 |
| <i>Fasciola gigantica</i>               | 0.9838 |
| <i>Schistosoma japonicum</i>            | 0.9838 |
| <i>Schistosoma mansoni</i>              | 0.9838 |
| <i>Schmidtea mediterranea</i>           | 0.9817 |
| <i>Dugesia ryukyuensis</i>              | 0.9817 |
| <i>Dugesia japonica</i>                 | 0.9817 |
| <i>Macracanthorhynchus hirudinaceus</i> | 0.9767 |
| <i>Paratenuisentis ambiguus</i>         | 0.9767 |
| <i>Echinorhynchus truttae</i>           | 0.9767 |
| <i>Pomphorhynchus laevis</i>            | 0.9767 |
| <i>Rotaria rotatoria</i>                | 0.9767 |
| <i>Philodina roseola</i>                | 0.9767 |
| <i>Adineta vaga</i>                     | 0.9767 |
| <i>Brachionus manjavacas</i>            | 0.9758 |
| <i>Brachionus plicatilis</i>            | 0.9758 |
| <i>Lecane inermis</i>                   | 0.9758 |
| <i>Nematoplanea coelognoporoides</i>    | 0.9757 |
| <i>Megadasys sp</i>                     | 0.9722 |
| <i>Macrodasys sp</i>                    | 0.9722 |
| <i>Turbanella ambronensis</i>           | 0.9722 |
| <i>Seison sp</i>                        | 0.9706 |
| <i>Dactylopodola baltica</i>            | 0.9693 |
| <i>Gnathostomula peregrina</i>          | 0.9409 |
| <i>Gnathostomula paradoxa</i>           | 0.9409 |
| <i>Lepidodermella squamata</i>          | 0.8760 |

**Table S11.** LB scores in the analyses of dataset d01.

| LB scores                               |       |
|-----------------------------------------|-------|
| <i>Tubulanus polymorphus</i>            | -20,3 |
| <i>Cephalothrix linearis</i>            | -18,6 |
| <i>Capitella teleta</i>                 | -18,5 |
| <i>Alvinella pompejana</i>              | -18,2 |
| <i>Terebratalia transversa</i>          | -17,4 |
| <i>Crassostrea gigas</i>                | -17,1 |
| <i>Lottia gigantea</i>                  | -16,9 |
| <i>Chaetopleura apiculata</i>           | -16,9 |
| <i>Tubifex tubifex</i>                  | -15,3 |
| <i>Lingula anatina</i>                  | -15,2 |
| <i>Aplysia californica</i>              | -14,8 |
| <i>Cristatella mucedo</i>               | -14,0 |
| <i>Lumbricus rubellus</i>               | -13,6 |
| <i>Neomenia megatrapezata</i>           | -13,4 |
| <i>Idiosepius paradoxus</i>             | -13,3 |
| <i>Euprymna scolopes</i>                | -12,9 |
| <i>Biomphalaria glabrata</i>            | -12,4 |
| <i>Priapulus caudatus</i>               | -11,2 |
| <i>Mytilus californianus</i>            | -11,2 |
| <i>Helobdella robusta</i>               | -11,0 |
| <i>Daphnia pulex</i>                    | -10,0 |
| <i>Apis mellifera</i>                   | -9,3  |
| <i>Pedicellina cernua</i>               | -9,0  |
| <i>Pedicellina sp</i>                   | -8,3  |
| <i>Bugula neritina</i>                  | -7,2  |
| <i>Stylochoplana maculata</i>           | -7,0  |
| <i>Brachionus plicatilis</i>            | -6,6  |
| <i>Paraplanocera sp</i>                 | -5,3  |
| <i>Flustra foliacea</i>                 | -5,0  |
| <i>Brachionus manjavacas</i>            | -4,6  |
| <i>Lecane inermis</i>                   | -4,2  |
| <i>Megadasys sp</i>                     | -3,9  |
| <i>Echinoderes horni</i>                | -3,2  |
| <i>Macrodasys sp</i>                    | -1,7  |
| <i>Nematoplanea coelognoporoides</i>    | 0,6   |
| <i>Turbanella ambronensis</i>           | 1,0   |
| <i>Tubulipora sp</i>                    | 1,1   |
| <i>Schistosoma mansoni</i>              | 2,1   |
| <i>Schistosoma japonicum</i>            | 2,8   |
| <i>Schmidtea mediterranea</i>           | 3,7   |
| <i>Rotaria rotatoria</i>                | 4,0   |
| <i>Spirometra erinacei</i>              | 5,4   |
| <i>Philodina roseola</i>                | 5,5   |
| <i>Dugesia ryukyuensis</i>              | 5,6   |
| <i>Echinococcus granulosus</i>          | 6,9   |
| <i>Echinococcus multilocularis</i>      | 7,2   |
| <i>Alcyonidium diaphanum</i>            | 7,3   |
| <i>Clonorchis sinensis</i>              | 7,5   |
| <i>Opisthorchis viverrini</i>           | 7,6   |
| <i>Dugesia japonica</i>                 | 7,7   |
| <i>Taenia solium</i>                    | 8,2   |
| <i>Fasciola gigantica</i>               | 9,6   |
| <i>Dactylopodola baltica</i>            | 9,6   |
| <i>Symbion pandora</i>                  | 9,6   |
| <i>Adineta vaga</i>                     | 10,8  |
| <i>Macrostomum lignano</i>              | 11,8  |
| <i>Lepidodermella squamata</i>          | 13,2  |
| <i>Moniezia expansa</i>                 | 13,7  |
| <i>Macracanthorhynchus hirudinaceus</i> | 14,4  |
| <i>Gnathostomula paradoxa</i>           | 16,9  |
| <i>Gnathostomula peregrina</i>          | 23,3  |
| <i>Seison sp</i>                        | 37,9  |
| <i>Pomphorhynchus laevis</i>            | 40,8  |
| <i>Echinorhynchus truttae</i>           | 42,6  |
| <i>Paratenuisentis ambiguus</i>         | 49,3  |

**Table S12.** Results for the principal component analyses of the gene properties of the 559 of the dataset d01. PC = principal component.

| <b>Loading matrix</b>                        | <b>PC1</b> | <b>PC2</b> | <b>PC3</b> | <b>PC4</b> | <b>PC5</b> |
|----------------------------------------------|------------|------------|------------|------------|------------|
| <b>Proportion of hydrophobic amino acids</b> | -0.3872    | 0.2117     | -0.7060    | -0.5388    | 0.1288     |
| <b>Base composition heterogeneity</b>        | 0.6328     | 0.2469     | -0.3703    | -0.0238    | -0.6331    |
| <b>Proportion of missing data</b>            | -0.6544    | 0.2188     | -0.0140    | 0.4367     | -0.5770    |
| <b>Branch length heterogeneity</b>           | -0.0544    | 0.5574     | 0.5920     | -0.5564    | -0.1624    |
| <b>Evolutionary rate</b>                     | 0.1356     | 0.7319     | -0.1175    | 0.4570     | 0.4725     |
| <b>Summary</b>                               |            |            |            |            |            |
| <b>Variance</b>                              | 1.5501     | 1.3390     | 0.9868     | 0.7204     | 0.4038     |
| <b>Relative variance</b>                     | 0.3100     | 0.2678     | 0.1974     | 0.1441     | 0.0808     |
| <b>Cumulative relative variance</b>          | 0.3100     | 0.5778     | 0.7752     | 0.9192     | 1.0000     |

**Table S13.** Presence of the 559 genes of dataset d01 found across the different partitioned datasets d02 through d10 numbered 2 to 10.

| Gene-ID | 2 | 3 | 4 | 5 | 6 | 7 | 8 | 9 | 10 |
|---------|---|---|---|---|---|---|---|---|----|
| 111203  | 0 | 0 | 1 | 0 | 0 | 0 | 0 | 1 | 1  |
| 111204  | 1 | 1 | 1 | 1 | 1 | 1 | 0 | 1 | 1  |
| 111206  | 0 | 0 | 0 | 0 | 0 | 0 | 0 | 1 | 1  |
| 111213  | 0 | 0 | 0 | 0 | 0 | 0 | 0 | 1 | 1  |
| 111214  | 0 | 1 | 1 | 1 | 1 | 1 | 0 | 1 | 1  |
| 111215  | 1 | 1 | 1 | 1 | 1 | 1 | 0 | 1 | 1  |
| 111216  | 1 | 1 | 1 | 1 | 1 | 1 | 0 | 0 | 1  |
| 111217  | 1 | 1 | 1 | 1 | 1 | 1 | 0 | 0 | 1  |
| 111222  | 0 | 0 | 1 | 1 | 1 | 1 | 0 | 1 | 1  |
| 111229  | 1 | 1 | 1 | 1 | 1 | 1 | 0 | 1 | 1  |
| 111232  | 0 | 0 | 0 | 0 | 0 | 0 | 0 | 1 | 1  |
| 111234  | 0 | 0 | 0 | 0 | 0 | 1 | 0 | 1 | 1  |
| 111237  | 1 | 1 | 0 | 0 | 0 | 0 | 1 | 1 | 1  |
| 111238  | 1 | 1 | 1 | 0 | 0 | 0 | 0 | 1 | 1  |
| 111239  | 0 | 1 | 0 | 0 | 0 | 0 | 1 | 1 | 1  |
| 111243  | 1 | 1 | 1 | 1 | 1 | 1 | 0 | 1 | 1  |
| 111247  | 0 | 1 | 0 | 0 | 0 | 0 | 0 | 1 | 1  |
| 111249  | 1 | 1 | 1 | 0 | 0 | 1 | 0 | 1 | 1  |
| 111251  | 0 | 1 | 0 | 0 | 0 | 0 | 1 | 1 | 1  |
| 111259  | 1 | 1 | 1 | 1 | 1 | 1 | 0 | 0 | 1  |
| 111260  | 0 | 0 | 0 | 0 | 0 | 1 | 1 | 0 | 1  |
| 111265  | 0 | 1 | 0 | 0 | 0 | 0 | 1 | 1 | 1  |
| 111266  | 1 | 1 | 1 | 1 | 1 | 1 | 0 | 1 | 1  |
| 111267  | 0 | 0 | 0 | 0 | 0 | 0 | 1 | 1 | 1  |
| 111268  | 0 | 0 | 0 | 0 | 0 | 0 | 0 | 1 | 1  |
| 111269  | 0 | 0 | 0 | 0 | 0 | 0 | 0 | 1 | 1  |
| 111271  | 1 | 1 | 0 | 0 | 0 | 1 | 0 | 1 | 1  |
| 111272  | 1 | 1 | 1 | 0 | 0 | 0 | 0 | 1 | 1  |
| 111273  | 0 | 0 | 1 | 0 | 0 | 1 | 0 | 1 | 1  |
| 111274  | 1 | 1 | 1 | 1 | 1 | 1 | 0 | 0 | 1  |
| 111275  | 1 | 1 | 1 | 1 | 1 | 1 | 0 | 1 | 1  |
| 111276  | 1 | 1 | 0 | 0 | 0 | 0 | 1 | 1 | 1  |
| 111277  | 1 | 1 | 1 | 1 | 1 | 1 | 1 | 0 | 1  |
| 111278  | 1 | 1 | 0 | 0 | 0 | 0 | 0 | 0 | 1  |
| 111281  | 1 | 1 | 1 | 1 | 1 | 1 | 0 | 0 | 1  |
| 111282  | 0 | 0 | 1 | 0 | 0 | 0 | 0 | 0 | 0  |
| 111283  | 0 | 0 | 0 | 0 | 0 | 1 | 1 | 1 | 1  |
| 111284  | 0 | 0 | 0 | 0 | 0 | 0 | 0 | 0 | 0  |
| 111286  | 1 | 1 | 1 | 1 | 1 | 1 | 0 | 0 | 1  |
| 111287  | 1 | 1 | 1 | 1 | 1 | 1 | 0 | 1 | 1  |
| 111290  | 0 | 1 | 1 | 0 | 0 | 1 | 0 | 1 | 1  |
| 111291  | 0 | 1 | 0 | 0 | 0 | 0 | 0 | 1 | 1  |
| 111295  | 1 | 1 | 1 | 1 | 1 | 1 | 0 | 1 | 1  |
| 111296  | 0 | 0 | 1 | 1 | 0 | 1 | 0 | 0 | 1  |
| 111298  | 0 | 1 | 1 | 0 | 0 | 0 | 0 | 1 | 1  |
| 111299  | 0 | 1 | 1 | 1 | 0 | 0 | 0 | 1 | 1  |
| 111300  | 1 | 1 | 1 | 1 | 0 | 0 | 0 | 1 | 1  |
| 111309  | 1 | 1 | 0 | 0 | 0 | 1 | 1 | 1 | 1  |
| 111313  | 0 | 1 | 1 | 1 | 0 | 0 | 1 | 1 | 1  |
| 111316  | 1 | 1 | 1 | 1 | 1 | 1 | 0 | 1 | 1  |

| Gene-ID | 2 | 3 | 4 | 5 | 6 | 7 | 8 | 9 | 10 |
|---------|---|---|---|---|---|---|---|---|----|
| 111318  | 1 | 1 | 1 | 1 | 0 | 0 | 1 | 0 | 1  |
| 111319  | 0 | 0 | 0 | 0 | 0 | 0 | 1 | 1 | 1  |
| 111320  | 0 | 0 | 0 | 0 | 0 | 0 | 1 | 1 | 1  |
| 111321  | 0 | 1 | 1 | 0 | 0 | 0 | 1 | 1 | 1  |
| 111324  | 1 | 1 | 1 | 1 | 0 | 1 | 1 | 1 | 1  |
| 111328  | 1 | 1 | 1 | 1 | 1 | 0 | 1 | 1 | 1  |
| 111329  | 0 | 1 | 0 | 0 | 0 | 0 | 0 | 1 | 1  |
| 111335  | 1 | 1 | 1 | 1 | 1 | 1 | 0 | 1 | 1  |
| 111345  | 0 | 1 | 1 | 0 | 0 | 0 | 1 | 1 | 1  |
| 111347  | 1 | 1 | 1 | 1 | 1 | 1 | 1 | 1 | 1  |
| 111348  | 0 | 1 | 0 | 0 | 0 | 0 | 0 | 1 | 1  |
| 111349  | 0 | 0 | 1 | 1 | 1 | 1 | 0 | 1 | 1  |
| 111352  | 0 | 1 | 0 | 0 | 0 | 0 | 1 | 0 | 1  |
| 111357  | 0 | 0 | 1 | 0 | 0 | 0 | 0 | 1 | 1  |
| 111359  | 1 | 1 | 0 | 0 | 0 | 0 | 0 | 1 | 1  |
| 111365  | 1 | 1 | 1 | 1 | 1 | 1 | 0 | 1 | 1  |
| 111375  | 0 | 0 | 0 | 0 | 0 | 1 | 0 | 1 | 1  |
| 111379  | 0 | 1 | 1 | 1 | 1 | 1 | 0 | 1 | 1  |
| 111387  | 1 | 1 | 1 | 1 | 0 | 0 | 1 | 1 | 1  |
| 111388  | 0 | 1 | 0 | 0 | 0 | 0 | 0 | 0 | 1  |
| 111391  | 0 | 0 | 0 | 0 | 0 | 0 | 0 | 1 | 1  |
| 111393  | 0 | 0 | 1 | 0 | 0 | 0 | 0 | 1 | 1  |
| 111394  | 1 | 1 | 1 | 1 | 1 | 1 | 1 | 0 | 1  |
| 111399  | 0 | 1 | 1 | 0 | 0 | 1 | 1 | 1 | 1  |
| 111401  | 0 | 1 | 1 | 1 | 0 | 0 | 0 | 1 | 1  |
| 111402  | 0 | 1 | 0 | 0 | 0 | 0 | 1 | 1 | 1  |
| 111404  | 1 | 1 | 0 | 0 | 0 | 0 | 0 | 1 | 1  |
| 111405  | 0 | 1 | 1 | 0 | 0 | 1 | 0 | 1 | 1  |
| 111409  | 0 | 1 | 0 | 0 | 0 | 1 | 1 | 1 | 1  |
| 111413  | 0 | 0 | 1 | 1 | 0 | 1 | 0 | 1 | 1  |
| 111414  | 0 | 1 | 1 | 1 | 1 | 1 | 0 | 0 | 1  |
| 111415  | 0 | 1 | 1 | 0 | 0 | 0 | 1 | 1 | 1  |
| 111418  | 0 | 1 | 0 | 0 | 0 | 0 | 0 | 1 | 1  |
| 111419  | 1 | 1 | 0 | 0 | 0 | 0 | 0 | 1 | 1  |
| 111421  | 0 | 1 | 1 | 1 | 0 | 0 | 0 | 1 | 1  |
| 111423  | 1 | 1 | 0 | 0 | 0 | 0 | 0 | 1 | 1  |
| 111425  | 0 | 1 | 0 | 0 | 0 | 0 | 0 | 1 | 1  |
| 111426  | 0 | 0 | 0 | 0 | 0 | 0 | 0 | 1 | 1  |
| 111427  | 1 | 1 | 1 | 0 | 0 | 0 | 0 | 1 | 1  |
| 111428  | 0 | 1 | 0 | 0 | 0 | 0 | 0 | 1 | 1  |
| 111429  | 1 | 1 | 1 | 1 | 0 | 0 | 1 | 1 | 1  |
| 111430  | 1 | 1 | 1 | 0 | 0 | 0 | 0 | 1 | 1  |
| 111431  | 0 | 0 | 1 | 1 | 0 | 0 | 0 | 0 | 1  |
| 111432  | 0 | 1 | 1 | 1 | 1 | 1 | 0 | 1 | 1  |
| 111433  | 0 | 0 | 1 | 1 | 1 | 0 | 0 | 1 | 1  |
| 111435  | 1 | 1 | 1 | 1 | 1 | 1 | 1 | 0 | 1  |
| 111436  | 0 | 0 | 0 | 0 | 0 | 0 | 1 | 1 | 1  |
| 111439  | 0 | 1 | 1 | 1 | 0 | 0 | 0 | 1 | 1  |
| 111440  | 1 | 1 | 1 | 1 | 1 | 1 | 0 | 1 | 1  |
| 111441  | 0 | 0 | 1 | 1 | 1 | 1 | 0 | 1 | 1  |







| Gene-ID | 2 | 3 | 4 | 5 | 6 | 7 | 8 | 9 | 10 |
|---------|---|---|---|---|---|---|---|---|----|
| 111919  | 0 | 1 | 0 | 0 | 0 | 0 | 0 | 1 | 1  |
| 111923  | 0 | 0 | 0 | 0 | 0 | 0 | 0 | 1 | 1  |
| 111924  | 0 | 0 | 0 | 0 | 0 | 1 | 0 | 0 | 1  |
| 111925  | 1 | 1 | 1 | 0 | 0 | 0 | 0 | 0 | 0  |
| 111931  | 0 | 1 | 1 | 0 | 0 | 0 | 0 | 1 | 1  |
| 111935  | 1 | 1 | 1 | 1 | 1 | 1 | 0 | 0 | 1  |
| 111936  | 1 | 1 | 1 | 1 | 0 | 0 | 0 | 1 | 1  |
| 111938  | 0 | 1 | 1 | 1 | 0 | 0 | 0 | 1 | 1  |
| 111939  | 1 | 1 | 0 | 0 | 0 | 0 | 1 | 1 | 1  |
| 111945  | 1 | 1 | 1 | 1 | 1 | 1 | 1 | 1 | 1  |
| 111946  | 0 | 1 | 1 | 0 | 0 | 0 | 0 | 1 | 1  |
| 111948  | 0 | 1 | 1 | 1 | 1 | 1 | 1 | 0 | 1  |
| 111950  | 0 | 1 | 0 | 0 | 0 | 0 | 0 | 1 | 1  |
| 111951  | 0 | 0 | 0 | 0 | 0 | 0 | 0 | 1 | 1  |
| 111952  | 0 | 1 | 1 | 0 | 0 | 0 | 1 | 0 | 1  |
| 111953  | 0 | 0 | 1 | 1 | 1 | 1 | 0 | 0 | 1  |
| 111956  | 1 | 1 | 1 | 1 | 1 | 1 | 0 | 1 | 1  |
| 111957  | 0 | 1 | 0 | 0 | 0 | 0 | 0 | 1 | 1  |
| 111958  | 0 | 0 | 1 | 1 | 0 | 0 | 0 | 1 | 1  |
| 111959  | 0 | 1 | 1 | 1 | 1 | 0 | 0 | 1 | 1  |
| 111960  | 1 | 1 | 1 | 1 | 1 | 1 | 0 | 1 | 1  |
| 111962  | 0 | 1 | 1 | 1 | 1 | 1 | 0 | 0 | 1  |
| 111964  | 0 | 0 | 1 | 0 | 0 | 0 | 0 | 1 | 1  |
| 111968  | 1 | 1 | 0 | 0 | 0 | 0 | 0 | 1 | 1  |
| 111969  | 0 | 1 | 0 | 0 | 0 | 0 | 1 | 1 | 1  |
| 111970  | 0 | 0 | 1 | 0 | 0 | 0 | 0 | 0 | 1  |
| 111971  | 0 | 0 | 0 | 0 | 0 | 0 | 0 | 1 | 1  |
| 111973  | 1 | 1 | 1 | 0 | 0 | 0 | 1 | 1 | 1  |
| 111981  | 0 | 1 | 1 | 0 | 0 | 1 | 1 | 1 | 1  |
| 111984  | 0 | 0 | 1 | 0 | 0 | 0 | 1 | 1 | 1  |
| 111987  | 0 | 1 | 0 | 0 | 0 | 0 | 1 | 1 | 1  |
| 111988  | 1 | 1 | 1 | 1 | 1 | 1 | 1 | 1 | 1  |
| 111989  | 1 | 1 | 1 | 1 | 1 | 1 | 0 | 1 | 1  |
| 111992  | 0 | 1 | 0 | 0 | 0 | 1 | 1 | 1 | 1  |
| 111995  | 1 | 1 | 0 | 0 | 0 | 0 | 1 | 1 | 1  |
| 111997  | 0 | 0 | 0 | 0 | 0 | 1 | 1 | 1 | 1  |
| 111998  | 0 | 1 | 1 | 1 | 1 | 1 | 0 | 1 | 1  |
| 112002  | 0 | 1 | 1 | 1 | 1 | 1 | 0 | 1 | 1  |
| 112003  | 1 | 1 | 1 | 1 | 1 | 1 | 1 | 0 | 1  |
| 112007  | 0 | 0 | 0 | 0 | 0 | 0 | 1 | 1 | 1  |
| 112011  | 0 | 1 | 1 | 0 | 0 | 1 | 0 | 1 | 1  |
| 112012  | 1 | 1 | 0 | 0 | 0 | 0 | 0 | 0 | 1  |
| 112013  | 0 | 0 | 0 | 0 | 0 | 0 | 1 | 1 | 1  |
| 112018  | 0 | 1 | 0 | 0 | 0 | 0 | 1 | 1 | 1  |
| 112020  | 0 | 0 | 0 | 0 | 0 | 1 | 0 | 1 | 1  |
| 112021  | 0 | 0 | 0 | 0 | 0 | 0 | 0 | 1 | 1  |
| 112028  | 0 | 0 | 0 | 0 | 0 | 0 | 1 | 1 | 1  |
| 112029  | 0 | 1 | 1 | 1 | 0 | 0 | 1 | 1 | 1  |
| 112030  | 0 | 1 | 0 | 0 | 0 | 0 | 0 | 0 | 1  |
| 112034  | 1 | 1 | 1 | 0 | 0 | 0 | 0 | 0 | 1  |
| 112037  | 1 | 1 | 1 | 1 | 0 | 1 | 1 | 1 | 1  |
| 112038  | 1 | 1 | 1 | 1 | 1 | 1 | 1 | 0 | 1  |
| 112040  | 1 | 1 | 1 | 1 | 1 | 0 | 1 | 1 | 1  |

| Gene-ID | 2 | 3 | 4 | 5 | 6 | 7 | 8 | 9 | 10 |
|---------|---|---|---|---|---|---|---|---|----|
| 112041  | 0 | 0 | 0 | 0 | 0 | 0 | 0 | 1 | 1  |
| 112044  | 1 | 1 | 1 | 0 | 0 | 0 | 1 | 1 | 1  |
| 112047  | 0 | 0 | 1 | 1 | 0 | 0 | 0 | 1 | 1  |
| 112050  | 0 | 0 | 0 | 0 | 0 | 1 | 0 | 0 | 1  |
| 112052  | 1 | 1 | 0 | 0 | 0 | 0 | 0 | 0 | 0  |
| 112053  | 0 | 0 | 1 | 0 | 0 | 1 | 0 | 0 | 0  |
| 112056  | 0 | 1 | 1 | 1 | 0 | 1 | 0 | 1 | 1  |
| 112059  | 0 | 0 | 0 | 0 | 0 | 0 | 0 | 1 | 1  |
| 112060  | 1 | 1 | 1 | 1 | 0 | 1 | 0 | 0 | 1  |
| 112066  | 0 | 1 | 1 | 1 | 1 | 1 | 0 | 1 | 1  |
| 112067  | 1 | 1 | 1 | 1 | 1 | 1 | 1 | 0 | 1  |
| 112071  | 1 | 1 | 0 | 0 | 0 | 0 | 1 | 1 | 1  |
| 112072  | 1 | 1 | 0 | 0 | 0 | 0 | 1 | 1 | 1  |
| 112076  | 0 | 0 | 0 | 0 | 0 | 0 | 0 | 1 | 1  |
| 112077  | 0 | 1 | 1 | 1 | 1 | 1 | 0 | 1 | 1  |
| 112081  | 0 | 0 | 0 | 0 | 0 | 0 | 0 | 1 | 1  |
| 112083  | 0 | 1 | 1 | 0 | 0 | 1 | 1 | 1 | 1  |
| 112085  | 1 | 1 | 0 | 0 | 0 | 0 | 0 | 0 | 1  |
| 112087  | 0 | 0 | 1 | 1 | 1 | 1 | 0 | 1 | 1  |
| 112088  | 1 | 1 | 1 | 1 | 0 | 0 | 0 | 1 | 1  |
| 112093  | 0 | 0 | 0 | 0 | 0 | 1 | 0 | 0 | 1  |
| 112094  | 0 | 1 | 0 | 0 | 0 | 1 | 0 | 1 | 1  |
| 112102  | 1 | 1 | 1 | 1 | 1 | 1 | 0 | 1 | 1  |
| 112105  | 0 | 1 | 1 | 0 | 0 | 0 | 1 | 1 | 1  |
| 112106  | 0 | 1 | 1 | 1 | 1 | 1 | 0 | 1 | 1  |
| 112107  | 1 | 1 | 1 | 0 | 0 | 1 | 1 | 1 | 1  |
| 112108  | 1 | 1 | 1 | 1 | 1 | 1 | 0 | 1 | 1  |
| 112110  | 0 | 1 | 0 | 0 | 0 | 0 | 0 | 1 | 1  |
| 112111  | 0 | 1 | 1 | 0 | 0 | 0 | 0 | 1 | 1  |
| 112113  | 1 | 1 | 1 | 0 | 0 | 0 | 1 | 1 | 1  |
| 112115  | 1 | 1 | 1 | 1 | 1 | 0 | 0 | 0 | 1  |
| 112117  | 0 | 1 | 0 | 0 | 0 | 1 | 1 | 1 | 1  |
| 112118  | 1 | 1 | 0 | 0 | 0 | 0 | 0 | 0 | 0  |
| 112121  | 0 | 1 | 0 | 0 | 0 | 0 | 0 | 1 | 1  |
| 112123  | 1 | 1 | 1 | 1 | 1 | 0 | 0 | 1 | 1  |
| 112124  | 0 | 1 | 1 | 1 | 1 | 0 | 0 | 1 | 1  |
| 112126  | 0 | 1 | 1 | 1 | 1 | 1 | 0 | 1 | 1  |
| 112129  | 1 | 1 | 1 | 1 | 1 | 1 | 0 | 1 | 1  |
| 112130  | 1 | 1 | 1 | 1 | 1 | 1 | 1 | 1 | 1  |
| 112135  | 0 | 0 | 0 | 0 | 0 | 0 | 0 | 0 | 1  |
| 112137  | 0 | 1 | 1 | 1 | 0 | 0 | 0 | 1 | 1  |
| 112141  | 1 | 1 | 0 | 0 | 0 | 1 | 1 | 1 | 1  |
| 112142  | 1 | 1 | 1 | 1 | 0 | 0 | 0 | 1 | 1  |
| 112144  | 1 | 1 | 1 | 1 | 1 | 0 | 1 | 1 | 1  |
| 112145  | 1 | 1 | 0 | 0 | 0 | 0 | 0 | 1 | 1  |
| 112147  | 1 | 1 | 1 | 1 | 1 | 1 | 0 | 1 | 1  |
| 112149  | 0 | 0 | 0 | 0 | 0 | 0 | 1 | 1 | 1  |
| 112151  | 0 | 1 | 1 | 0 | 0 | 0 | 1 | 1 | 1  |
| 112152  | 0 | 0 | 0 | 0 | 0 | 0 | 0 | 1 | 1  |
| 112156  | 0 | 1 | 1 | 1 | 1 | 0 | 0 | 1 | 1  |
| 112157  | 0 | 1 | 0 | 0 | 0 | 0 | 0 | 0 | 0  |
| 112158  | 0 | 0 | 1 | 1 | 0 | 1 | 0 | 1 | 1  |
| 112159  | 0 | 1 | 0 | 0 | 0 | 1 | 1 | 1 | 1  |

| Gene-ID | 2 | 3 | 4 | 5 | 6 | 7 | 8 | 9 | 10 |
|---------|---|---|---|---|---|---|---|---|----|
| 112160  | 0 | 1 | 1 | 1 | 1 | 0 | 0 | 1 | 1  |
| 112163  | 0 | 0 | 1 | 1 | 0 | 0 | 0 | 1 | 1  |
| 112164  | 1 | 1 | 1 | 0 | 0 | 1 | 1 | 1 | 1  |
| 112167  | 0 | 0 | 0 | 0 | 0 | 0 | 0 | 1 | 1  |
| 112168  | 1 | 1 | 0 | 0 | 0 | 0 | 1 | 1 | 1  |
| 112169  | 0 | 1 | 1 | 1 | 0 | 1 | 1 | 1 | 1  |
| 112173  | 0 | 0 | 0 | 0 | 0 | 0 | 0 | 0 | 0  |
| 112174  | 0 | 0 | 0 | 0 | 0 | 0 | 0 | 0 | 0  |
| 112176  | 1 | 1 | 0 | 0 | 0 | 0 | 0 | 1 | 1  |
| 112178  | 1 | 1 | 1 | 1 | 1 | 0 | 0 | 0 | 1  |
| 112180  | 0 | 0 | 0 | 0 | 0 | 0 | 1 | 1 | 1  |
| 112181  | 1 | 1 | 1 | 1 | 1 | 1 | 0 | 1 | 1  |
| 112182  | 0 | 1 | 1 | 0 | 0 | 0 | 0 | 1 | 1  |
| 112183  | 0 | 0 | 1 | 0 | 0 | 0 | 0 | 1 | 1  |
| 112184  | 0 | 0 | 1 | 0 | 0 | 0 | 1 | 1 | 1  |
| 112186  | 1 | 1 | 1 | 1 | 1 | 1 | 0 | 1 | 1  |
| 112187  | 0 | 1 | 1 | 0 | 0 | 0 | 0 | 1 | 1  |
| 112195  | 1 | 1 | 1 | 1 | 1 | 1 | 1 | 1 | 1  |
| 112197  | 0 | 0 | 0 | 0 | 0 | 0 | 0 | 1 | 1  |
| 112199  | 1 | 1 | 1 | 0 | 0 | 0 | 0 | 1 | 1  |
| 112201  | 0 | 0 | 1 | 0 | 0 | 0 | 1 | 1 | 1  |
| 112202  | 1 | 1 | 1 | 1 | 1 | 1 | 0 | 0 | 1  |
| 112203  | 0 | 0 | 1 | 0 | 0 | 0 | 0 | 1 | 1  |
| 112204  | 1 | 1 | 1 | 1 | 1 | 1 | 0 | 1 | 1  |
| 112206  | 1 | 1 | 1 | 1 | 0 | 1 | 0 | 1 | 1  |
| 112207  | 0 | 1 | 0 | 0 | 0 | 0 | 1 | 1 | 1  |
| 112211  | 0 | 0 | 0 | 0 | 0 | 0 | 0 | 0 | 1  |
| 112214  | 0 | 0 | 0 | 0 | 0 | 1 | 1 | 0 | 1  |
| 112219  | 0 | 0 | 0 | 0 | 0 | 0 | 0 | 0 | 0  |
| 112221  | 0 | 0 | 1 | 1 | 0 | 0 | 1 | 0 | 1  |
| 112222  | 0 | 1 | 0 | 0 | 0 | 0 | 1 | 0 | 1  |
| 112223  | 1 | 1 | 1 | 1 | 0 | 1 | 1 | 1 | 1  |
| 112224  | 0 | 0 | 0 | 0 | 0 | 0 | 0 | 1 | 1  |
| 112226  | 0 | 1 | 1 | 0 | 0 | 0 | 0 | 1 | 1  |
| 112227  | 0 | 0 | 0 | 0 | 0 | 0 | 0 | 1 | 1  |
| 112235  | 0 | 1 | 0 | 0 | 0 | 0 | 0 | 1 | 1  |
| 112240  | 0 | 1 | 0 | 0 | 0 | 0 | 0 | 0 | 1  |
| 112242  | 1 | 1 | 1 | 1 | 1 | 1 | 1 | 0 | 1  |
| 112243  | 0 | 0 | 1 | 0 | 0 | 1 | 1 | 0 | 0  |
| 112247  | 0 | 1 | 1 | 1 | 0 | 0 | 0 | 1 | 1  |
| 112251  | 0 | 0 | 0 | 0 | 0 | 0 | 0 | 1 | 1  |
| 112252  | 0 | 1 | 0 | 0 | 0 | 0 | 0 | 1 | 1  |
| 112254  | 1 | 1 | 1 | 1 | 1 | 1 | 0 | 1 | 1  |
| 112255  | 1 | 1 | 1 | 1 | 1 | 1 | 1 | 1 | 1  |
| 112256  | 1 | 1 | 1 | 1 | 0 | 0 | 0 | 1 | 1  |
| 112259  | 0 | 0 | 1 | 0 | 0 | 1 | 0 | 1 | 1  |
| 112263  | 0 | 0 | 1 | 0 | 0 | 1 | 0 | 1 | 1  |
| 112268  | 0 | 0 | 0 | 0 | 0 | 0 | 0 | 1 | 1  |
| 112270  | 0 | 1 | 0 | 0 | 0 | 0 | 0 | 0 | 1  |
| 112271  | 1 | 1 | 1 | 1 | 1 | 0 | 1 | 1 | 1  |
| 112275  | 0 | 0 | 0 | 0 | 0 | 0 | 0 | 1 | 1  |
| 112279  | 1 | 1 | 0 | 0 | 0 | 0 | 0 | 0 | 1  |
| 112280  | 1 | 1 | 0 | 0 | 0 | 0 | 0 | 0 | 1  |

| Gene-ID | 2 | 3 | 4 | 5 | 6 | 7 | 8 | 9 | 10 |
|---------|---|---|---|---|---|---|---|---|----|
| 112281  | 0 | 0 | 1 | 1 | 1 | 1 | 0 | 0 | 1  |
| 112284  | 1 | 1 | 1 | 1 | 1 | 0 | 0 | 1 | 1  |
| 112286  | 1 | 1 | 1 | 0 | 0 | 0 | 0 | 0 | 1  |
| 112291  | 1 | 1 | 0 | 0 | 0 | 1 | 1 | 1 | 1  |
| 112292  | 1 | 1 | 1 | 1 | 0 | 0 | 0 | 1 | 1  |
| 112293  | 0 | 0 | 0 | 0 | 0 | 0 | 0 | 0 | 1  |
| 112297  | 1 | 1 | 1 | 1 | 1 | 1 | 0 | 1 | 1  |
| 112298  | 1 | 1 | 1 | 1 | 1 | 1 | 0 | 0 | 0  |
| 112299  | 0 | 1 | 0 | 0 | 0 | 0 | 0 | 1 | 1  |
| 112300  | 1 | 1 | 1 | 0 | 0 | 0 | 0 | 1 | 1  |
| 112301  | 1 | 1 | 1 | 1 | 1 | 1 | 0 | 0 | 1  |
| 112307  | 0 | 1 | 1 | 1 | 0 | 0 | 0 | 1 | 1  |
| 112308  | 0 | 1 | 0 | 0 | 0 | 0 | 0 | 1 | 1  |
| 112310  | 0 | 1 | 1 | 0 | 0 | 0 | 0 | 1 | 1  |
| 112311  | 1 | 1 | 1 | 1 | 1 | 1 | 0 | 1 | 1  |
| 112312  | 0 | 0 | 1 | 0 | 0 | 0 | 0 | 1 | 1  |
| 112315  | 0 | 1 | 1 | 1 | 0 | 0 | 1 | 1 | 1  |
| 112316  | 0 | 0 | 0 | 0 | 0 | 0 | 0 | 1 | 1  |
| 112319  | 0 | 0 | 0 | 0 | 0 | 0 | 1 | 1 | 1  |
| 112322  | 1 | 1 | 1 | 1 | 1 | 1 | 0 | 0 | 0  |
| 112324  | 0 | 1 | 0 | 0 | 0 | 1 | 0 | 1 | 1  |
| 112327  | 0 | 0 | 0 | 0 | 0 | 0 | 1 | 1 | 1  |
| 112329  | 1 | 1 | 0 | 0 | 0 | 0 | 0 | 1 | 1  |
| 112332  | 0 | 1 | 0 | 0 | 0 | 0 | 0 | 1 | 1  |
| 112334  | 0 | 0 | 0 | 0 | 0 | 0 | 1 | 1 | 1  |
| 112335  | 0 | 1 | 0 | 0 | 0 | 0 | 1 | 1 | 1  |
| 112339  | 1 | 1 | 1 | 0 | 0 | 1 | 0 | 1 | 1  |
| 112341  | 0 | 0 | 0 | 0 | 0 | 0 | 0 | 0 | 1  |
| 112342  | 0 | 1 | 1 | 1 | 1 | 1 | 0 | 1 | 1  |
| 112345  | 1 | 1 | 1 | 0 | 0 | 0 | 1 | 1 | 1  |
| 112349  | 0 | 0 | 1 | 1 | 0 | 0 | 0 | 0 | 1  |
| 112350  | 0 | 1 | 1 | 1 | 1 | 1 | 0 | 1 | 1  |
| 112352  | 0 | 0 | 1 | 0 | 0 | 0 | 0 | 0 | 1  |
| 112354  | 1 | 1 | 1 | 1 | 1 | 1 | 0 | 1 | 1  |
| 112355  | 1 | 1 | 1 | 1 | 1 | 1 | 0 | 1 | 1  |
| 112358  | 1 | 1 | 1 | 1 | 1 | 0 | 0 | 0 | 1  |
| 112359  | 1 | 1 | 1 | 1 | 1 | 1 | 1 | 0 | 1  |
| 112360  | 0 | 1 | 1 | 0 | 0 | 0 | 0 | 1 | 1  |
| 112364  | 1 | 1 | 1 | 0 | 0 | 0 | 0 | 1 | 1  |
| 112365  | 0 | 0 | 0 | 0 | 0 | 1 | 0 | 1 | 1  |
| 112366  | 1 | 1 | 1 | 1 | 0 | 1 | 1 | 1 | 1  |
| 112367  | 1 | 1 | 1 | 1 | 1 | 1 | 0 | 1 | 1  |
| 112369  | 0 | 1 | 0 | 0 | 0 | 0 | 1 | 1 | 1  |
| 112375  | 1 | 1 | 0 | 0 | 0 | 1 | 0 | 1 | 1  |
| 112376  | 0 | 1 | 1 | 1 | 1 | 1 | 0 | 1 | 1  |
| 112379  | 1 | 1 | 1 | 1 | 0 | 1 | 0 | 1 | 1  |
| 112380  | 1 | 1 | 1 | 1 | 1 | 0 | 1 | 1 | 1  |
| 112381  | 1 | 1 | 0 | 0 | 0 | 1 | 1 | 1 | 1  |
| 112382  | 1 | 1 | 1 | 0 | 0 | 0 | 1 | 1 | 1  |
| 112383  | 1 | 1 | 0 | 0 | 0 | 0 | 0 | 1 | 1  |
| 112386  | 0 | 1 | 1 | 1 | 0 | 1 | 0 | 1 | 1  |
| 112388  | 0 | 1 | 0 | 0 | 0 | 0 | 0 | 1 | 1  |
| 112389  | 0 | 0 | 1 | 0 | 0 | 0 | 0 | 1 | 1  |

| Gene-ID | 2 | 3 | 4 | 5 | 6 | 7 | 8 | 9 | 10 |
|---------|---|---|---|---|---|---|---|---|----|
| 112390  | 0 | 1 | 1 | 0 | 0 | 0 | 0 | 1 | 1  |
| 112391  | 1 | 1 | 1 | 0 | 0 | 1 | 0 | 1 | 1  |
| 112392  | 1 | 1 | 1 | 1 | 1 | 1 | 0 | 1 | 1  |
| 112394  | 1 | 1 | 1 | 1 | 1 | 0 | 1 | 0 | 1  |
| 112395  | 0 | 1 | 1 | 0 | 0 | 0 | 0 | 1 | 1  |
| 112399  | 0 | 1 | 1 | 1 | 1 | 1 | 1 | 0 | 1  |
| 112402  | 0 | 0 | 1 | 0 | 0 | 0 | 1 | 1 | 1  |
| 112403  | 0 | 1 | 0 | 0 | 0 | 0 | 1 | 1 | 1  |
| 112405  | 0 | 0 | 1 | 1 | 0 | 1 | 1 | 0 | 1  |
| 112406  | 0 | 1 | 1 | 1 | 1 | 0 | 0 | 0 | 1  |
| 112407  | 1 | 1 | 1 | 1 | 1 | 1 | 1 | 0 | 1  |
| 112414  | 1 | 1 | 1 | 1 | 1 | 1 | 0 | 0 | 1  |
| 112415  | 1 | 1 | 1 | 1 | 0 | 0 | 0 | 1 | 1  |
| 112416  | 0 | 0 | 0 | 0 | 0 | 0 | 0 | 1 | 1  |
| 112417  | 1 | 1 | 1 | 1 | 1 | 1 | 0 | 0 | 1  |
| 112420  | 0 | 0 | 0 | 0 | 0 | 0 | 0 | 1 | 1  |
| 112421  | 0 | 1 | 1 | 1 | 1 | 0 | 0 | 1 | 1  |

| Gene-ID | 2 | 3 | 4 | 5 | 6 | 7 | 8 | 9 | 10 |
|---------|---|---|---|---|---|---|---|---|----|
| 112422  | 0 | 0 | 1 | 1 | 1 | 1 | 0 | 1 | 1  |
| 112425  | 1 | 1 | 1 | 1 | 1 | 1 | 0 | 1 | 1  |
| 112427  | 0 | 1 | 1 | 0 | 0 | 0 | 0 | 1 | 1  |
| 112432  | 0 | 1 | 0 | 0 | 0 | 1 | 1 | 1 | 1  |
| 112433  | 0 | 1 | 1 | 1 | 1 | 0 | 0 | 1 | 1  |
| 112434  | 0 | 0 | 1 | 1 | 0 | 0 | 0 | 1 | 1  |
| 112436  | 1 | 1 | 1 | 1 | 1 | 1 | 1 | 0 | 1  |
| 112437  | 0 | 1 | 1 | 1 | 0 | 0 | 0 | 1 | 1  |
| 112438  | 0 | 1 | 1 | 0 | 0 | 0 | 1 | 1 | 1  |
| 112443  | 0 | 0 | 1 | 1 | 1 | 1 | 0 | 1 | 1  |
| 112445  | 1 | 1 | 0 | 0 | 0 | 0 | 1 | 1 | 1  |
| 112446  | 1 | 1 | 1 | 0 | 0 | 1 | 0 | 0 | 1  |
| 112447  | 0 | 1 | 0 | 0 | 0 | 0 | 0 | 1 | 1  |
| 112448  | 1 | 1 | 1 | 1 | 1 | 1 | 0 | 0 | 1  |
| 112449  | 1 | 1 | 1 | 1 | 0 | 1 | 0 | 1 | 1  |
| 112450  | 0 | 1 | 0 | 0 | 0 | 0 | 0 | 1 | 1  |
| 112451  | 1 | 1 | 1 | 1 | 1 | 0 | 0 | 1 | 1  |
| 112452  | 0 | 1 | 0 | 0 | 0 | 0 | 0 | 1 | 1  |
